# Supplementary material for: Design, Synthesis, and Bioactivity Evaluation of New Thiochromanone Derivatives Containing a Carboxamide Moiety
Source: MDPI journal article supplement (doi:10.3390/molecules26154391), 2021-07-21
Supplement: s1 [file s1]

## Supplementary

# Design, Synthesis, and Bioactivity Evaluation of New Thiochromanone Derivatives Containing a Carboxamide Moiety

Lingling Xiao <sup>1,†</sup>, Lu Yu <sup>1,†</sup>, Pei Li <sup>1,2,\*</sup>, Jiyan Chi <sup>1</sup>, Zhangfei Tang <sup>1</sup>, Jie Li <sup>1</sup>, Shuming Tan <sup>1,\*</sup> and Xiaodan Wang <sup>1,3</sup>

<sup>1</sup> School of Liquor and Food Engineering, Guizhou University, Guiyang 550025, China; an1378386891@163.com (L.X.), lyu1@gzu.edu.cn (L.Y.), qq1401064120@126.com (J.C.), tzf18885247153@163.com (Z.T.), sushilee0120@163.com (J.L.), wangxiaodan0516@126.com (X.W.)

<sup>2</sup> Qiandongnan Engineering and Technology Research Center for Comprehensive Utilization of National Medicine/Key Laboratory for Modernization of Qiandongnan Miao & Dong Medicine, Kaili University, Kaili 556011, China

<sup>3</sup> Guizhou Provincial Key Laboratory of Fermentation Engineering and Biological Pharmacy, Guizhou University, Guiyang 550025, China

\* Correspondence: lipei@kluniv.edu.cn (P.L.), smtan@gzu.edu.cn (S.T.); Tel.: +86(0851)8559466

† Lingling Xiao and Lu Yu contributed equally to this work.

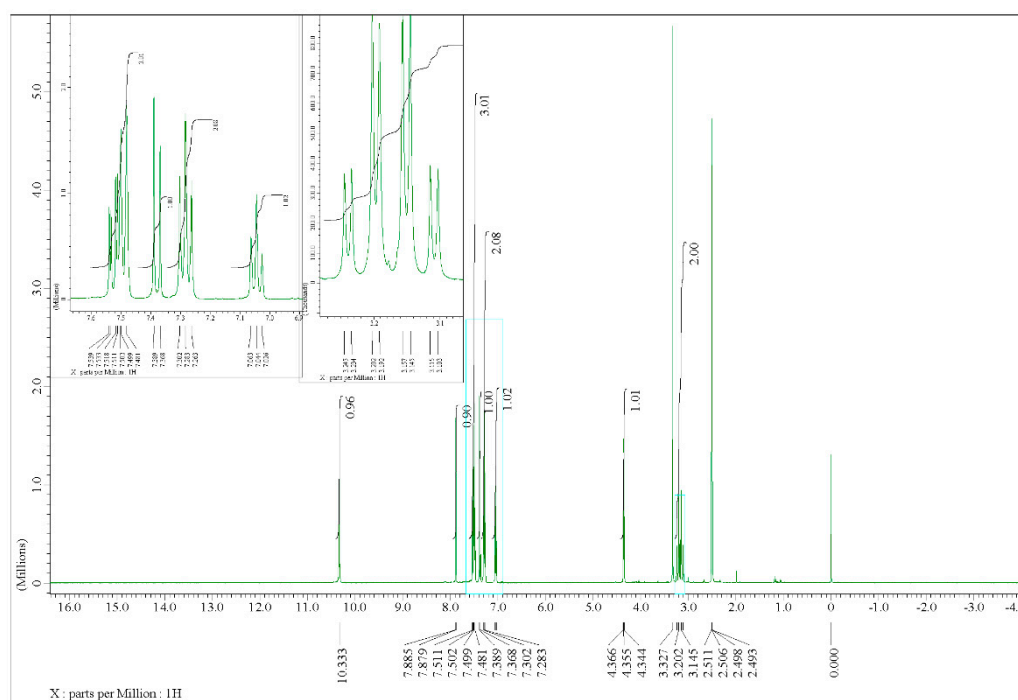 $^1\text{H}$  NMR of compound 3a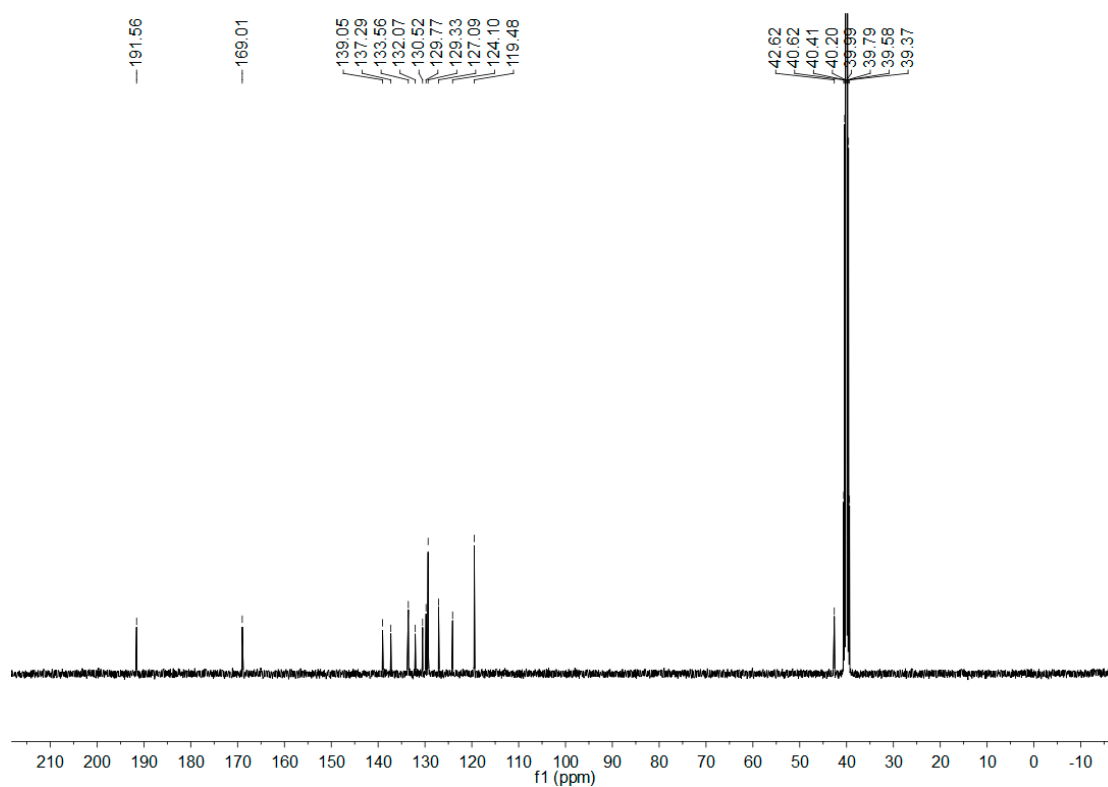 $^{13}\text{C}$  NMR of compound 3a

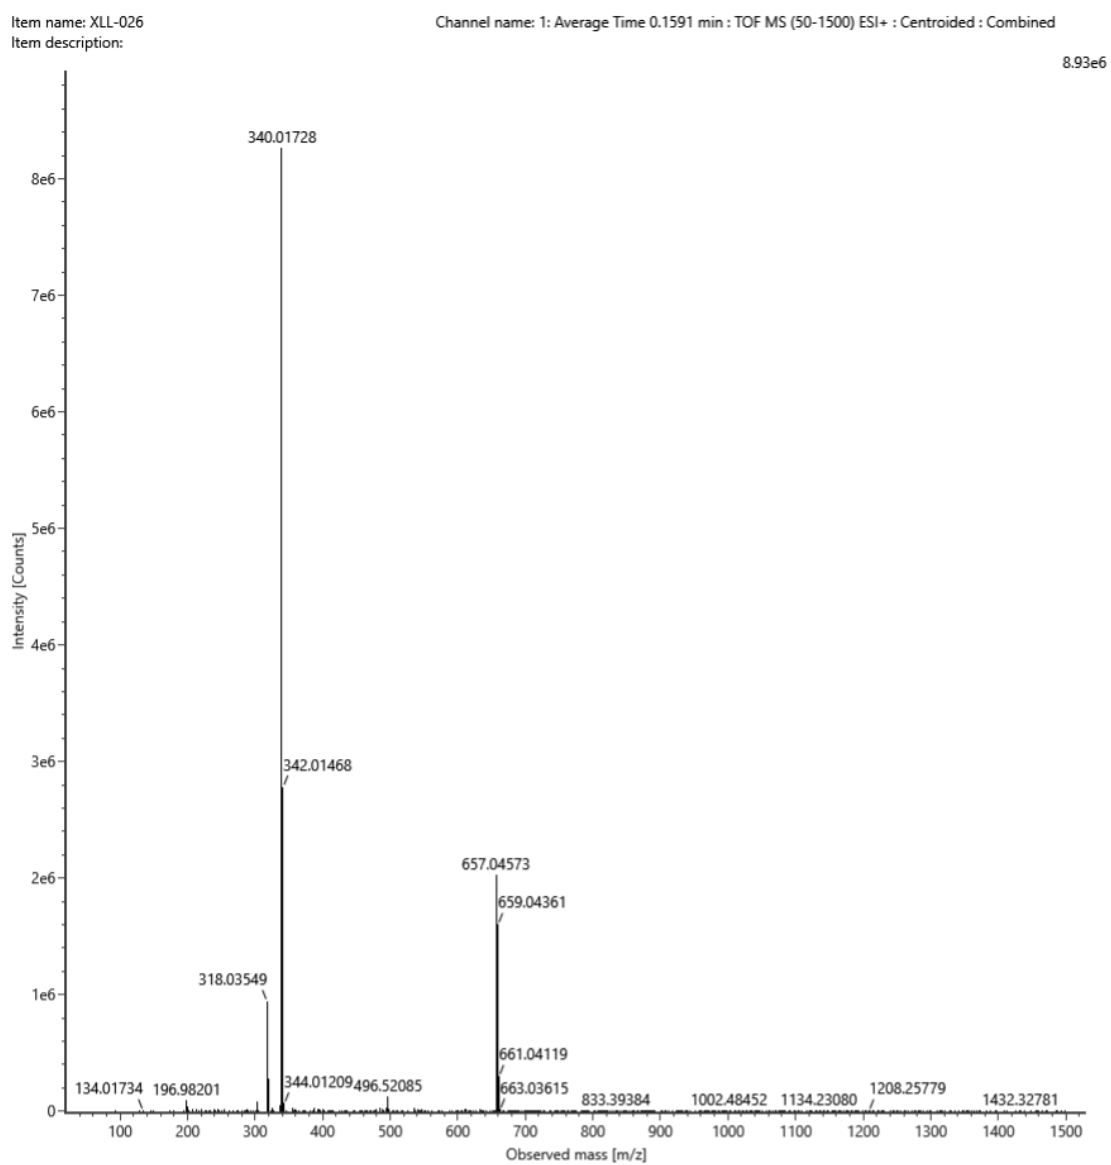

HRMS of compound 3a

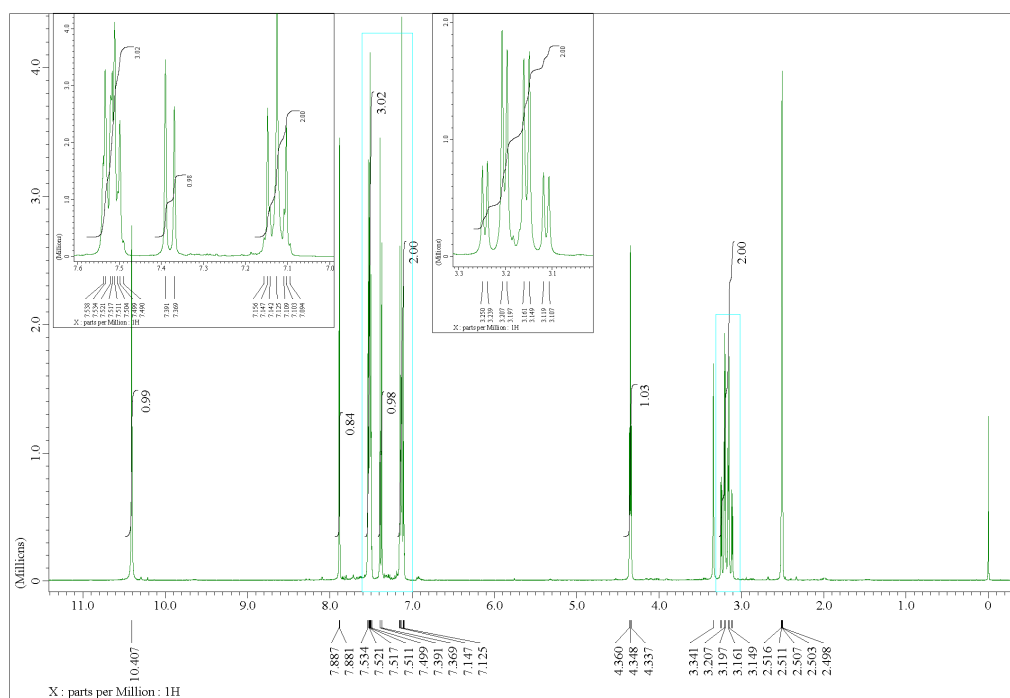 $^1\text{H}$  NMR of compound 3b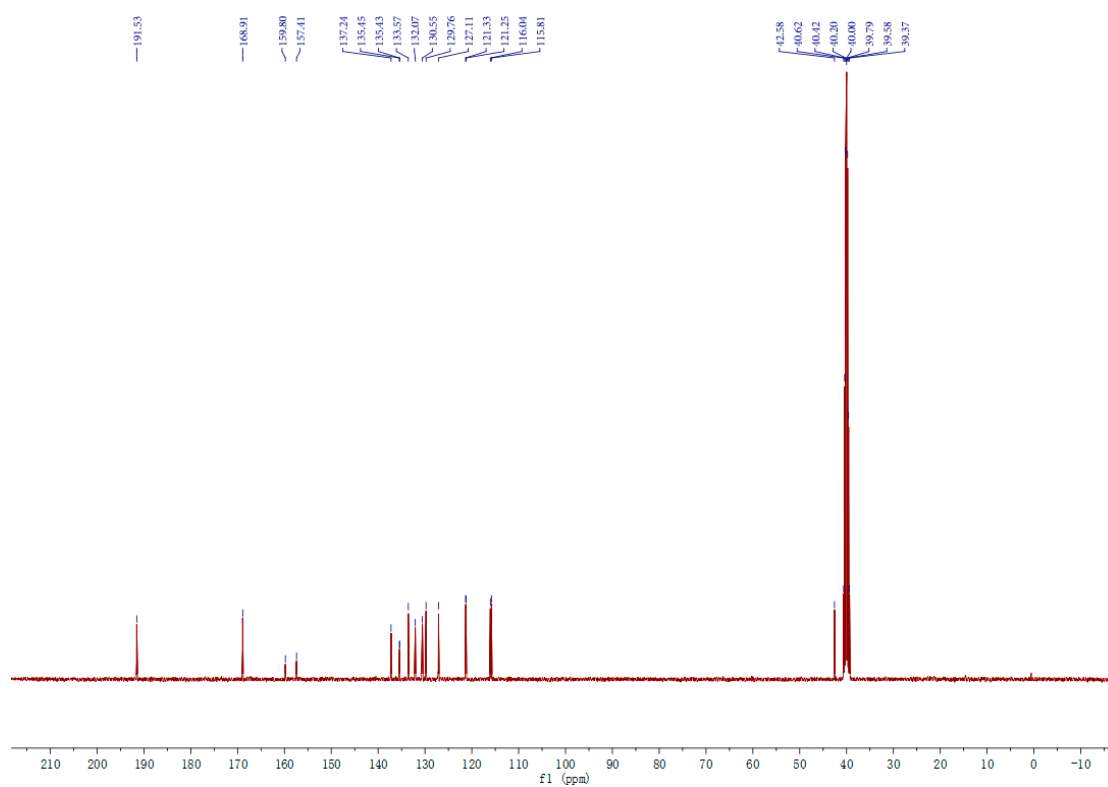 $^{13}\text{C}$  NMR of compound 3b

Item name: XLL-066  
Item description:

Channel name: 1: Average Time 0.0703 min : TOF MS (50-1500) ESI+ : Centroided : Combined

3.21e6

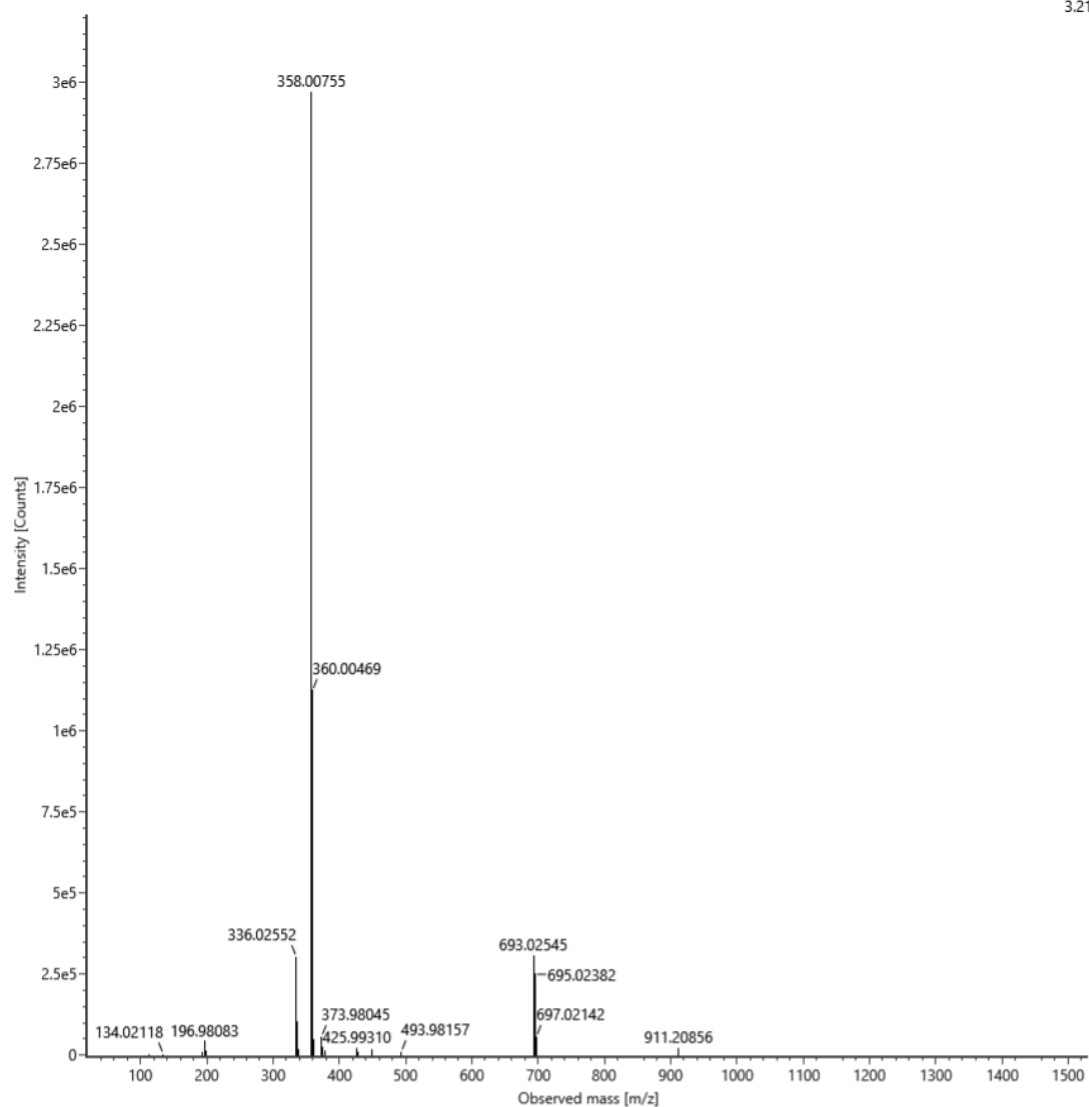

HRMS of compound 3b

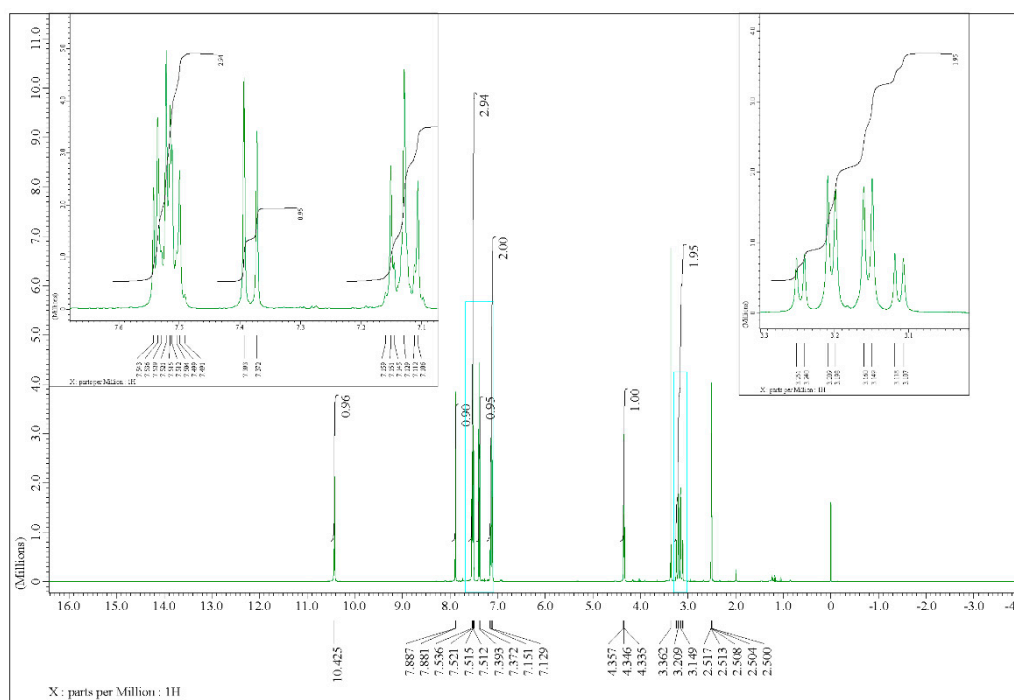<sup>1</sup>H NMR of compound 3c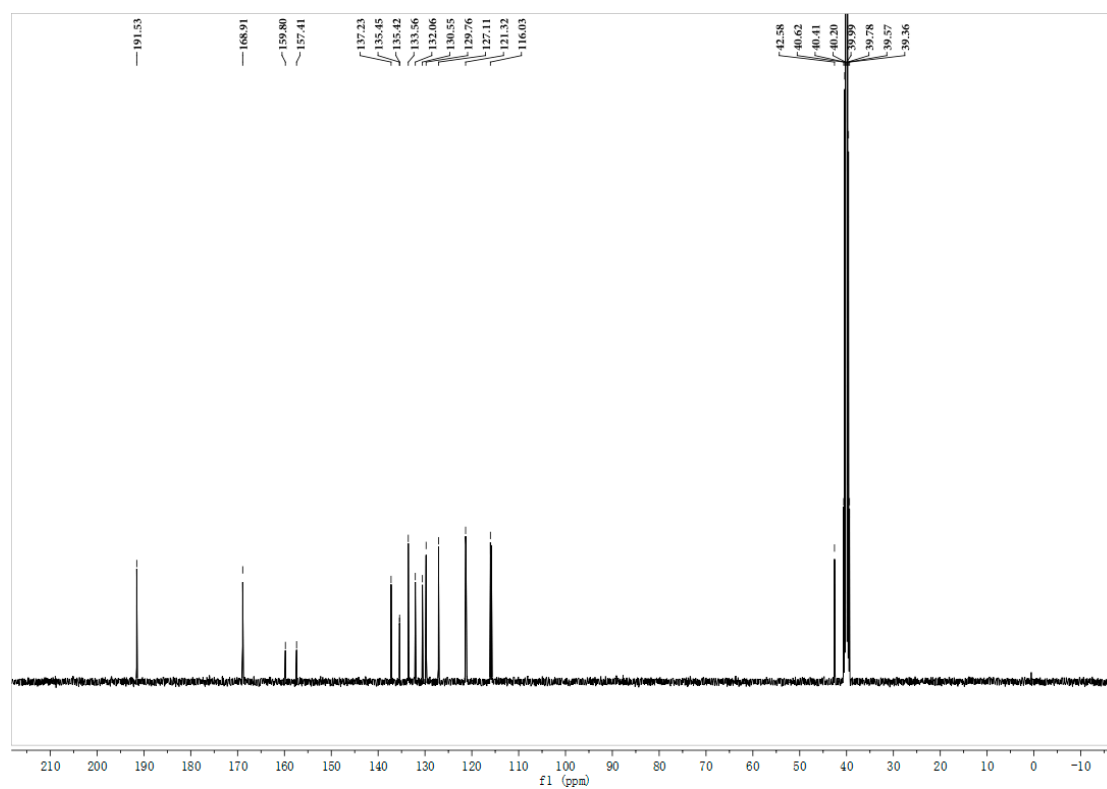<sup>13</sup>C NMR of compound 3c

Item name: XLL-031  
Item description:

Channel name: 1: Average Time 0.1089 min : TOF MS (50-1500) ESI+ : Centroided : Combined

4.82e5

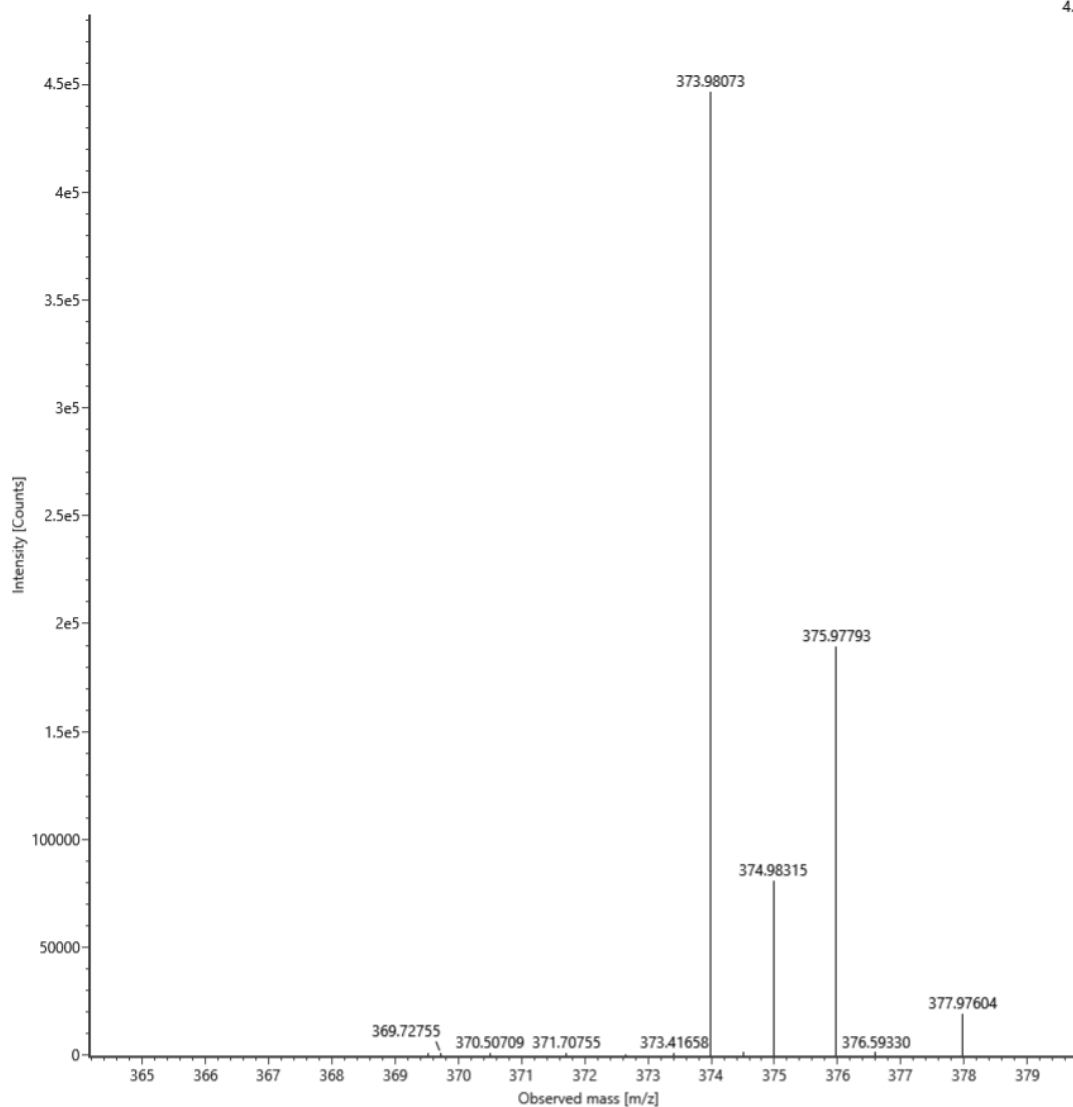

HRMS of compound 3c

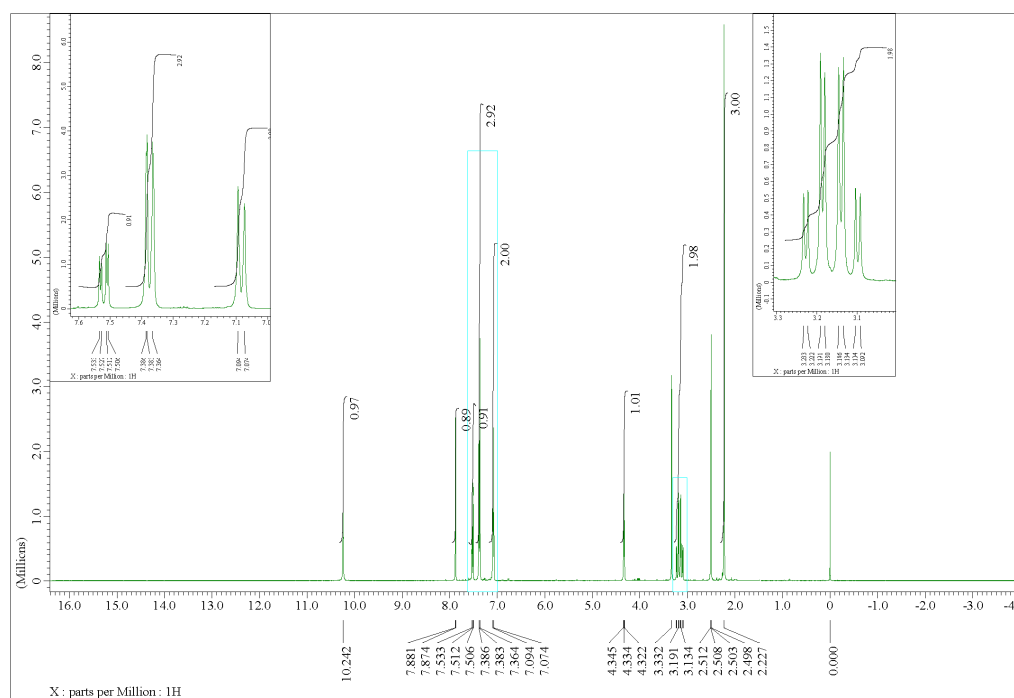<sup>1</sup>H NMR of compound 3d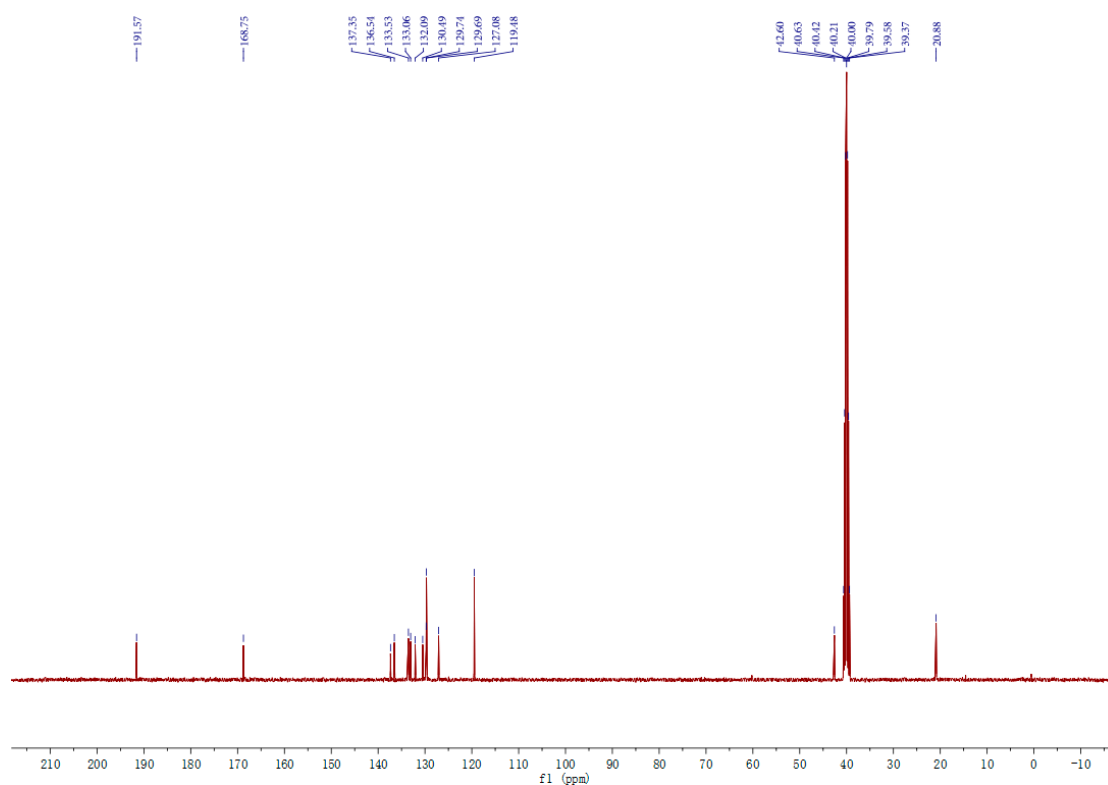<sup>13</sup>C NMR of compound 3d



Item name: XLL-065  
Item description:

Channel name: 1: Average Time 0.0703 min : TOF MS (50-1500) ESI+ : Centroided : Combined

3.8e6

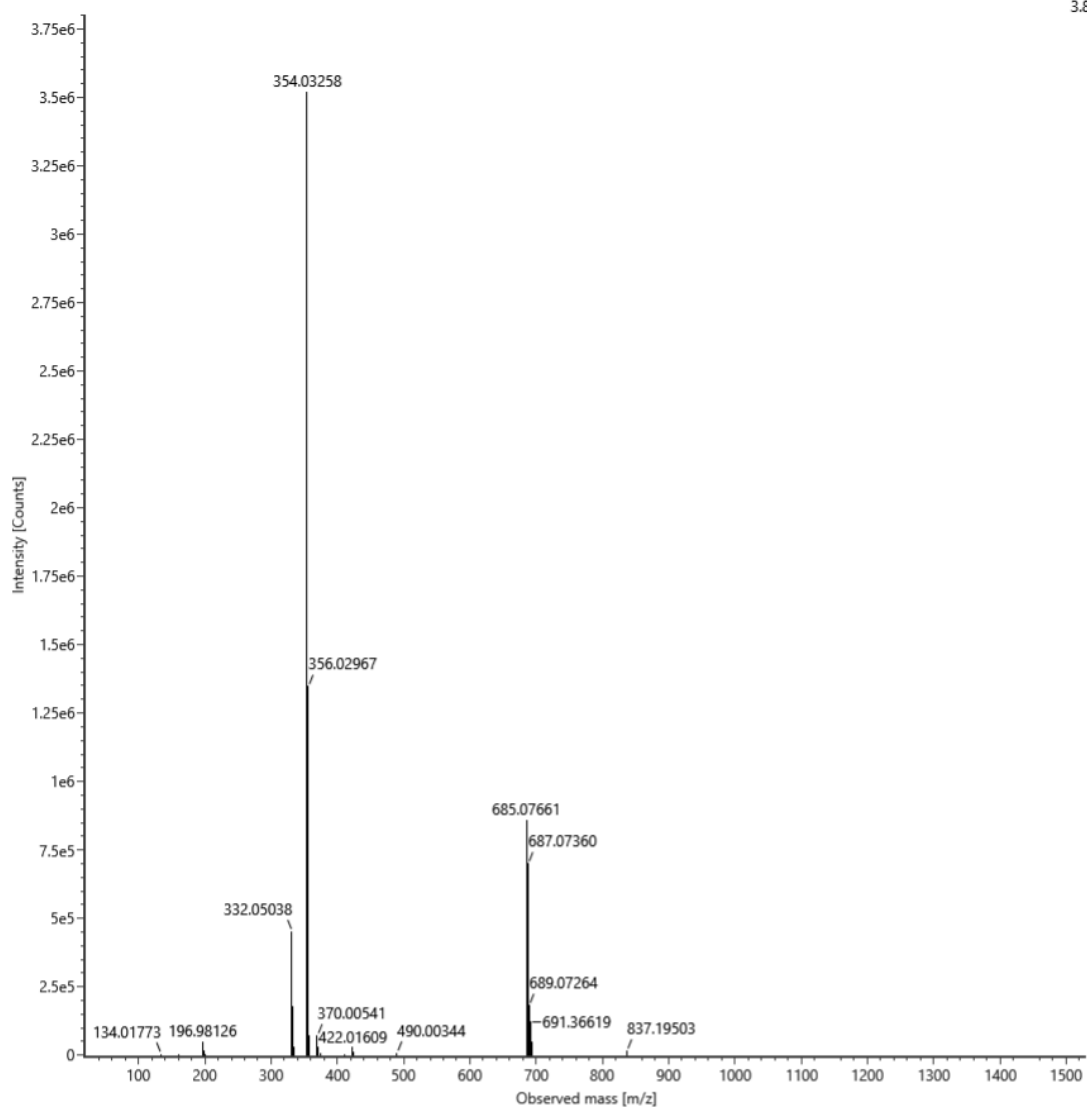

HRMS of compound 3d

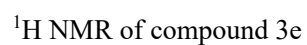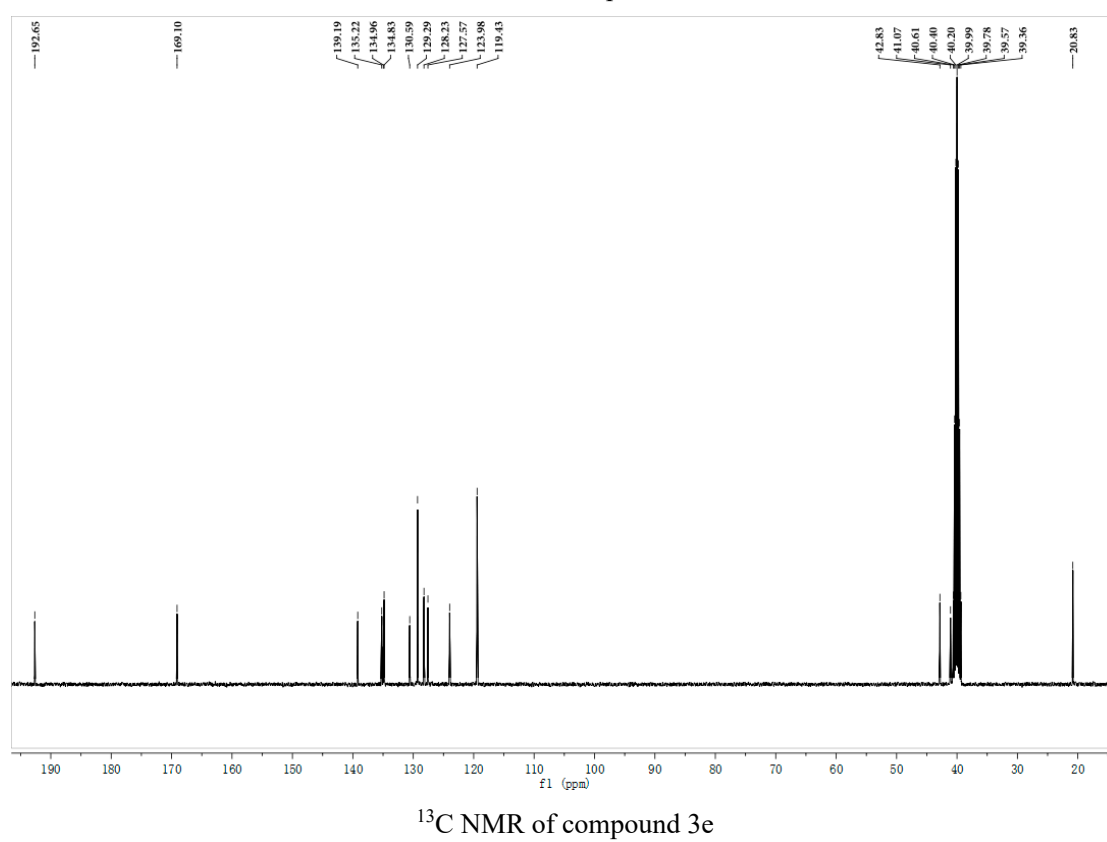

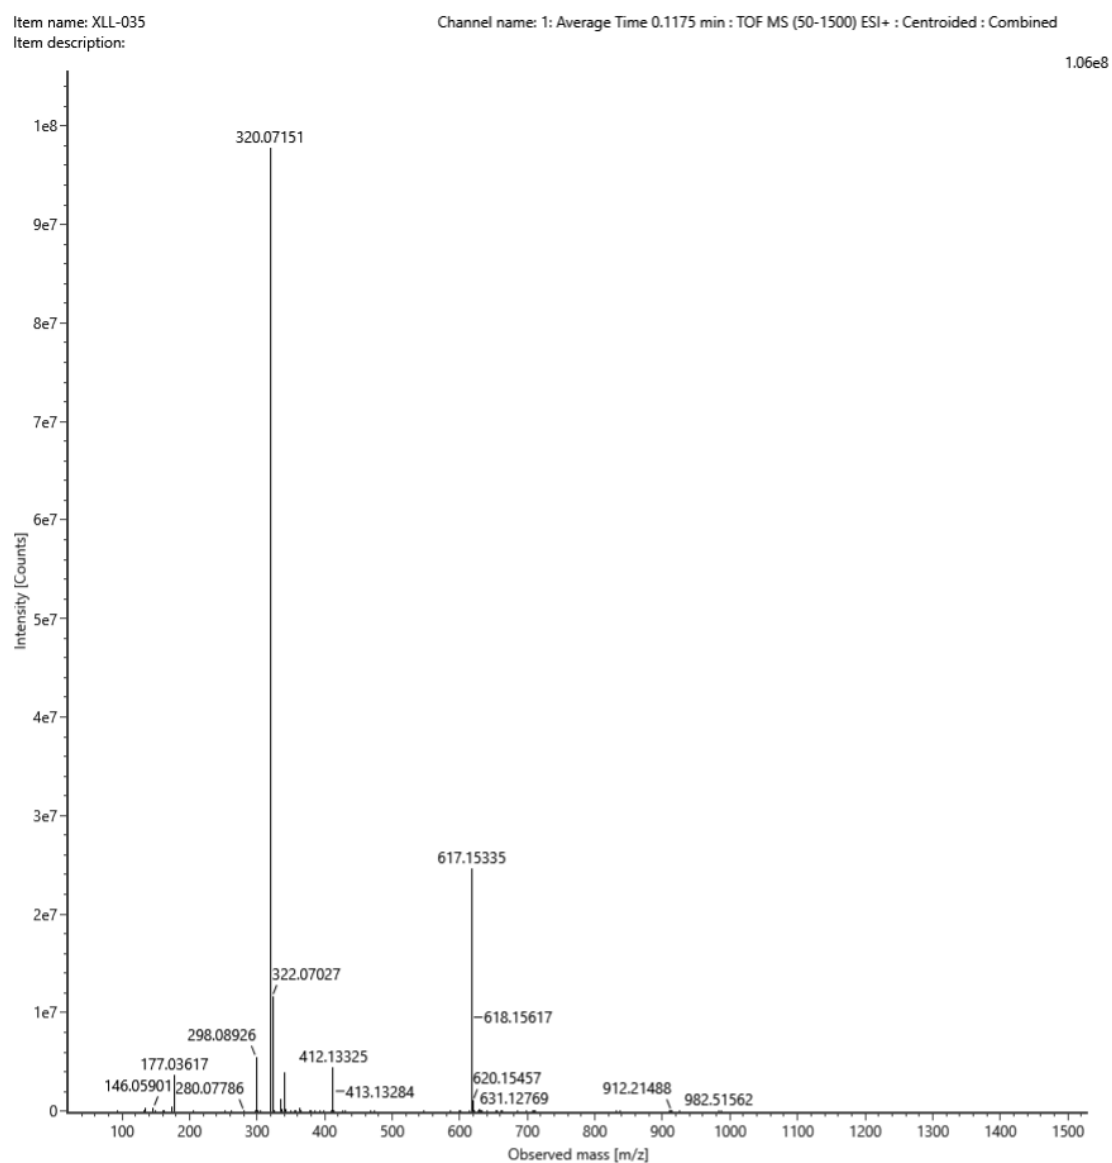

HRMS of compound 3e

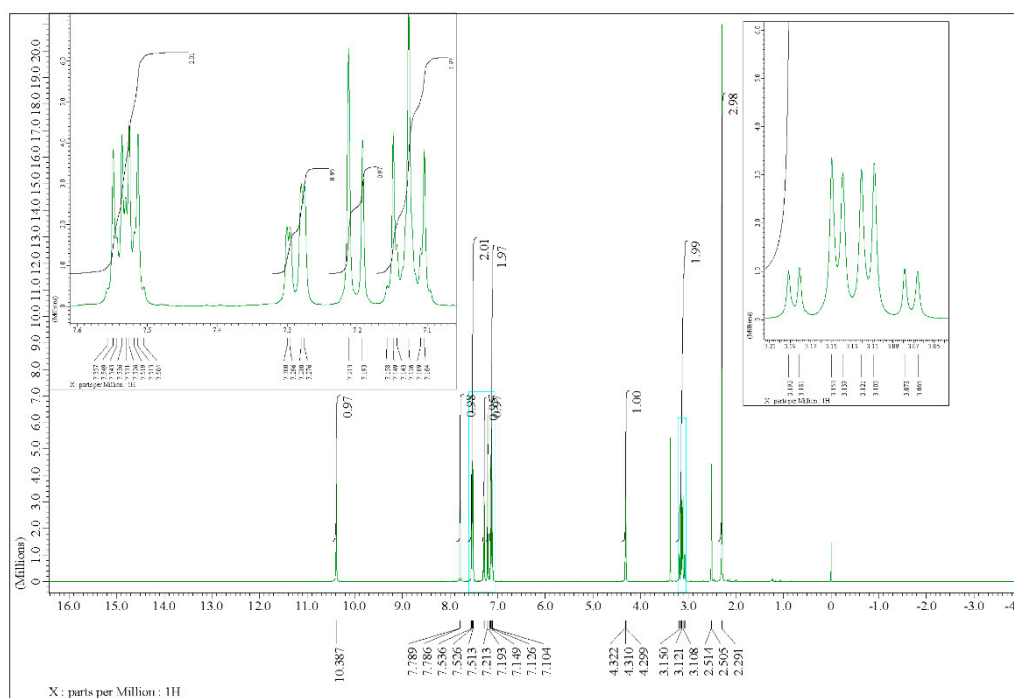<sup>1</sup>H NMR of compound 3f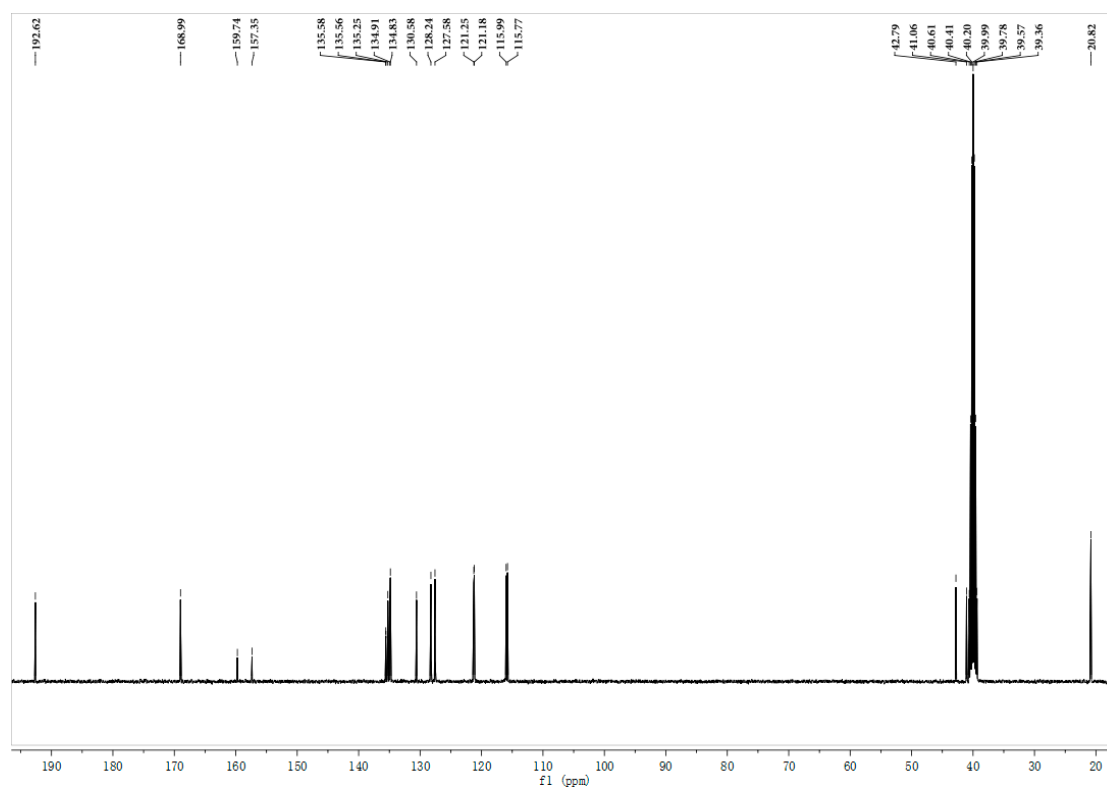<sup>13</sup>C NMR of compound 3f

Item name: XLL-036  
Item description:

Channel name: 1: Average Time 0.1175 min : TOF MS (50-1500) ESI+ : Centroided : Combined

1.02e8

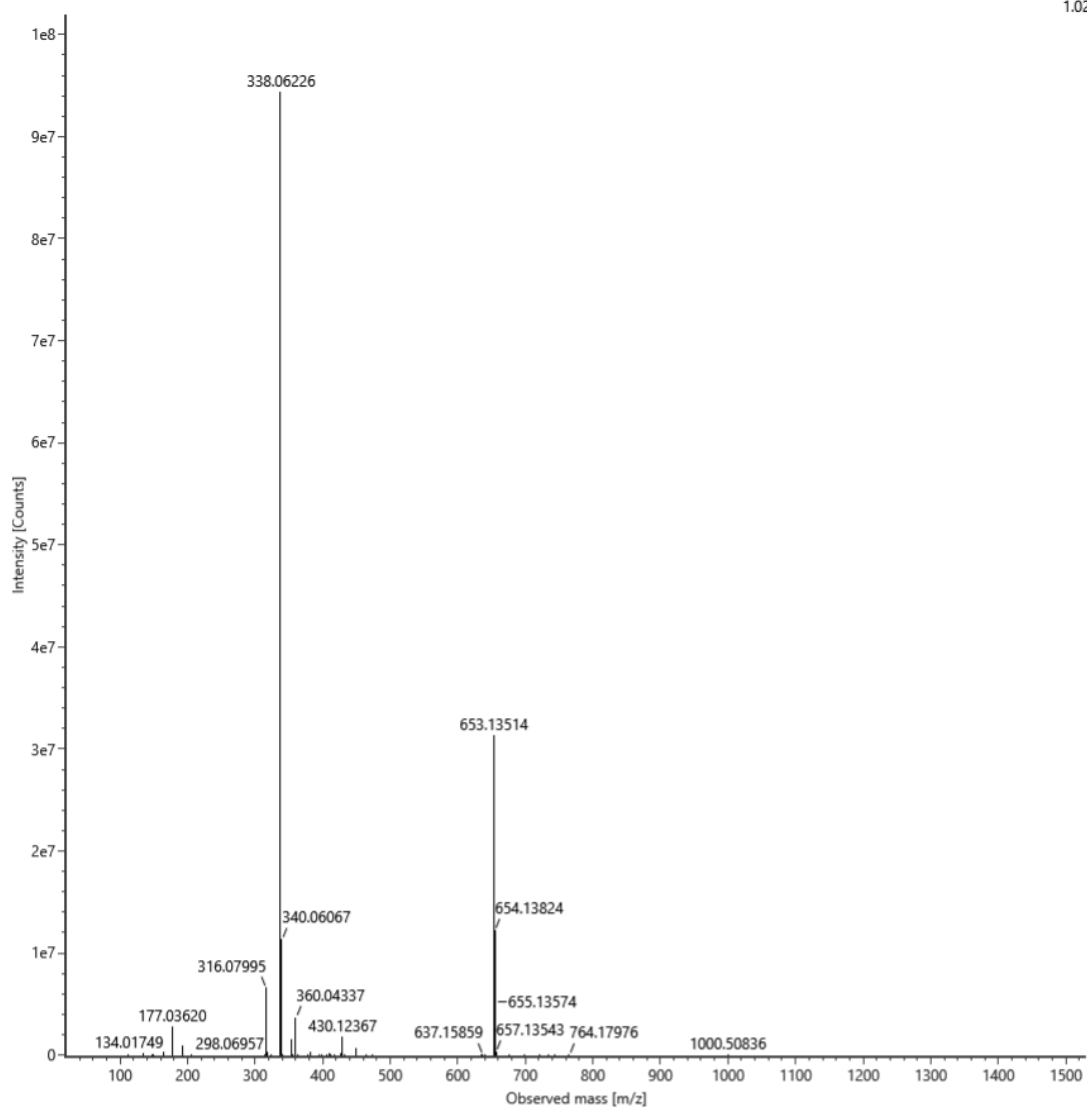

HRMS of compound 3f

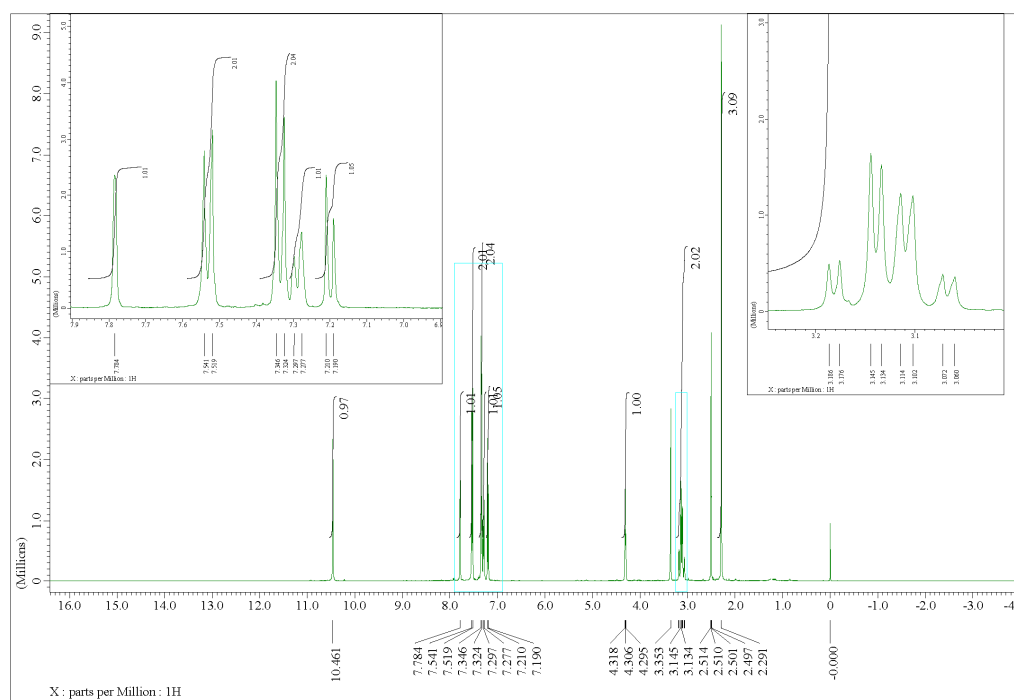<sup>1</sup>H NMR of compound 3g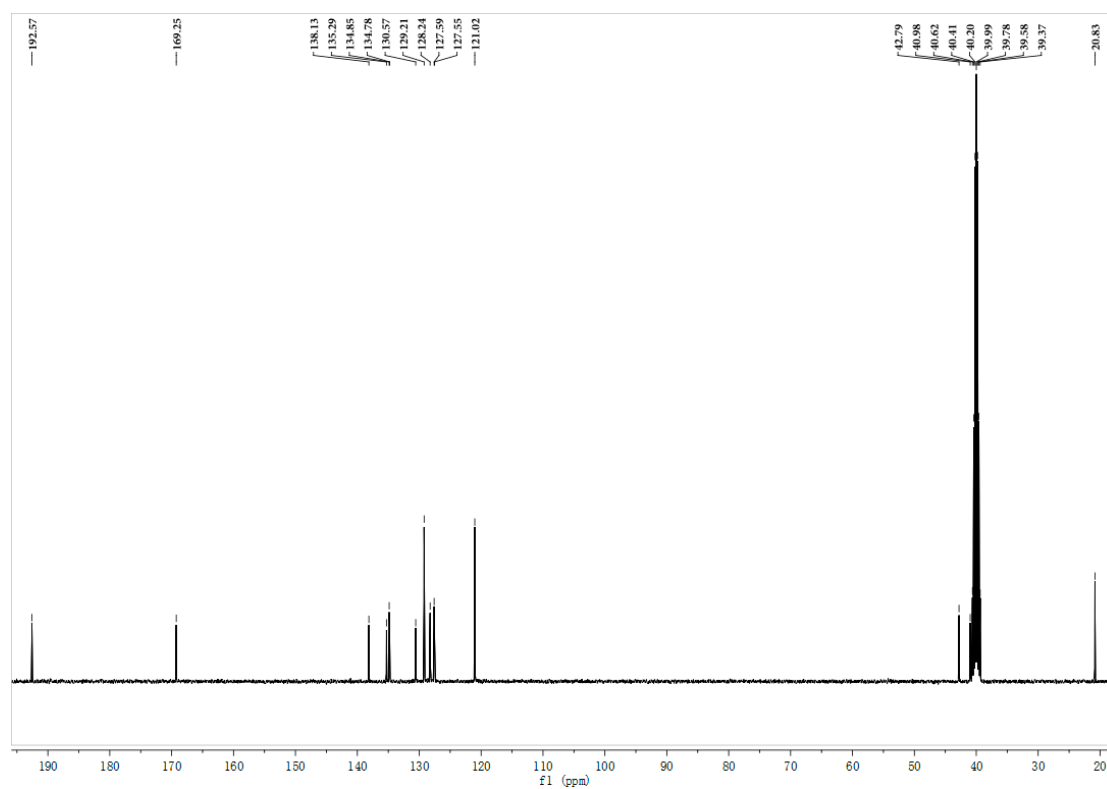<sup>13</sup>C NMR of compound 3g

Item name: XLL-034  
Item description:

Channel name: 1: Average Time 0.1046 min : TOF MS (50-1500) ESI+ : Centroided : Combined

4.7e7

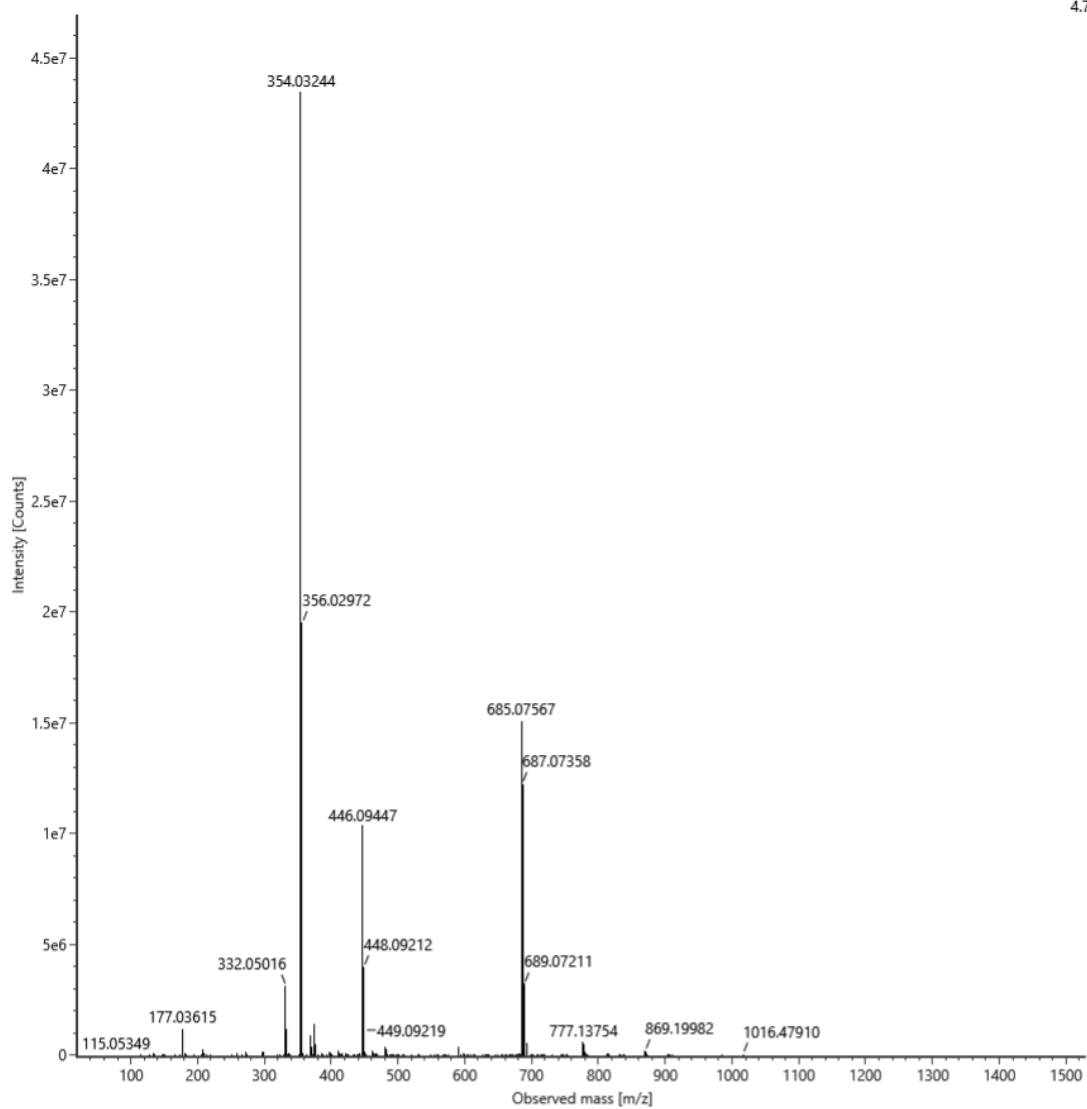

HRMS of compound 3g

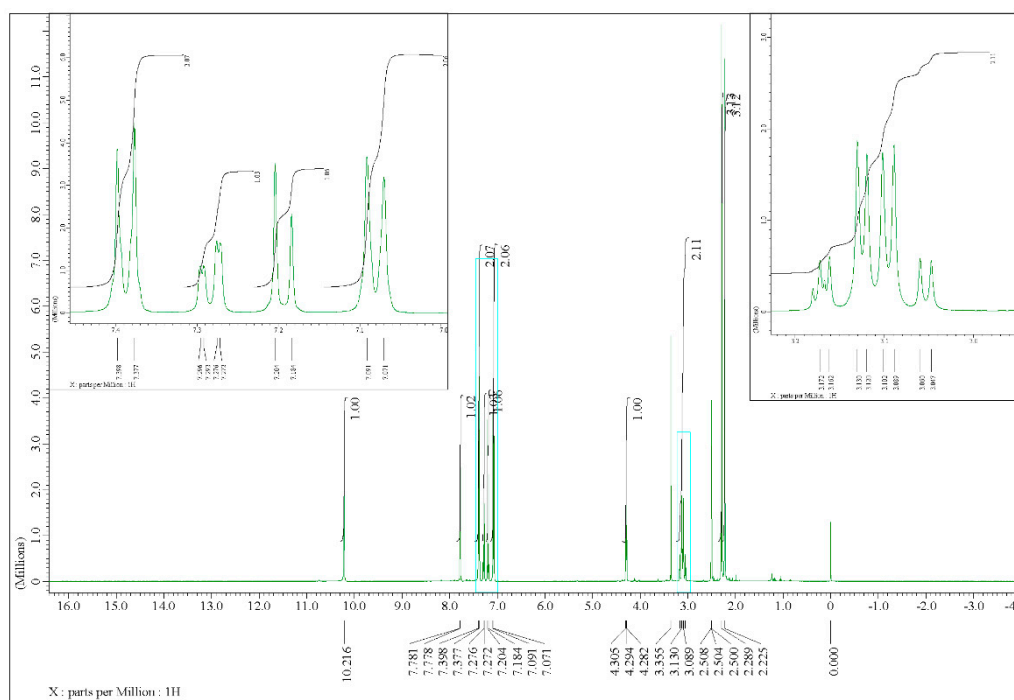<sup>1</sup>H NMR of compound 3h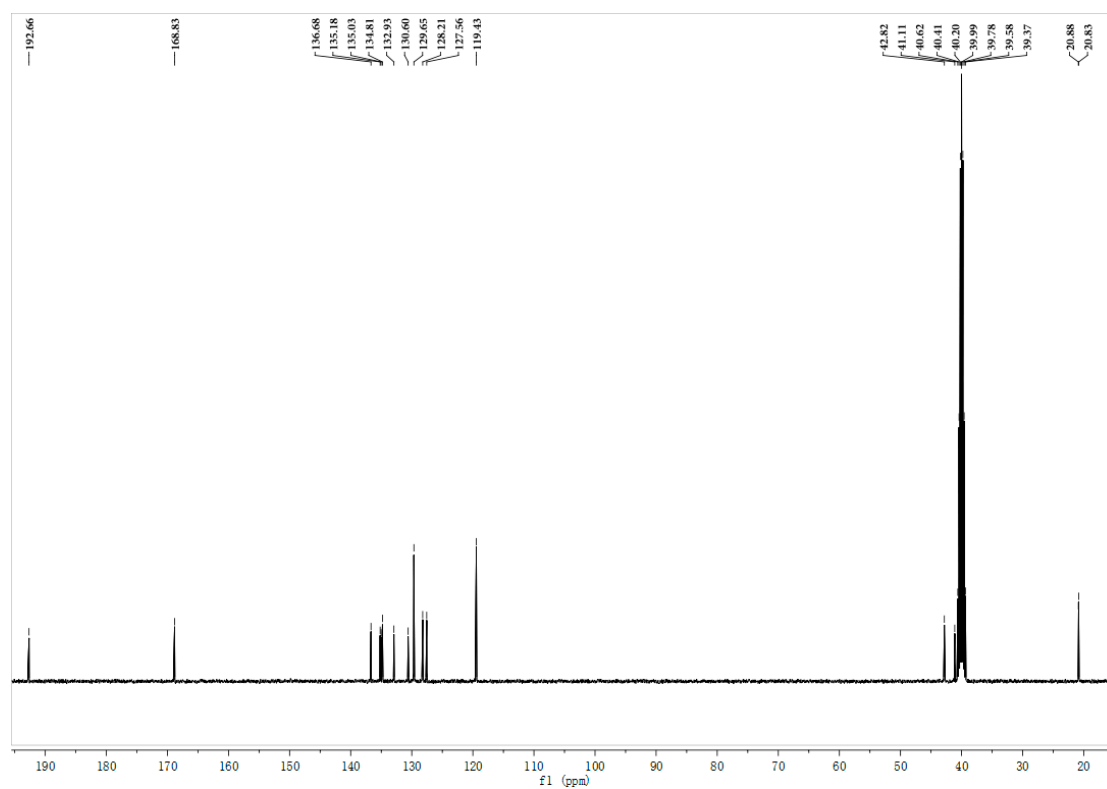<sup>13</sup>C NMR of compound 3h



Item name: XLL-033  
Item description:

Channel name: 1: Average Time 0.1132 min : TOF MS (50-1500) ESI+ : Centroided : Combined

8.26e7

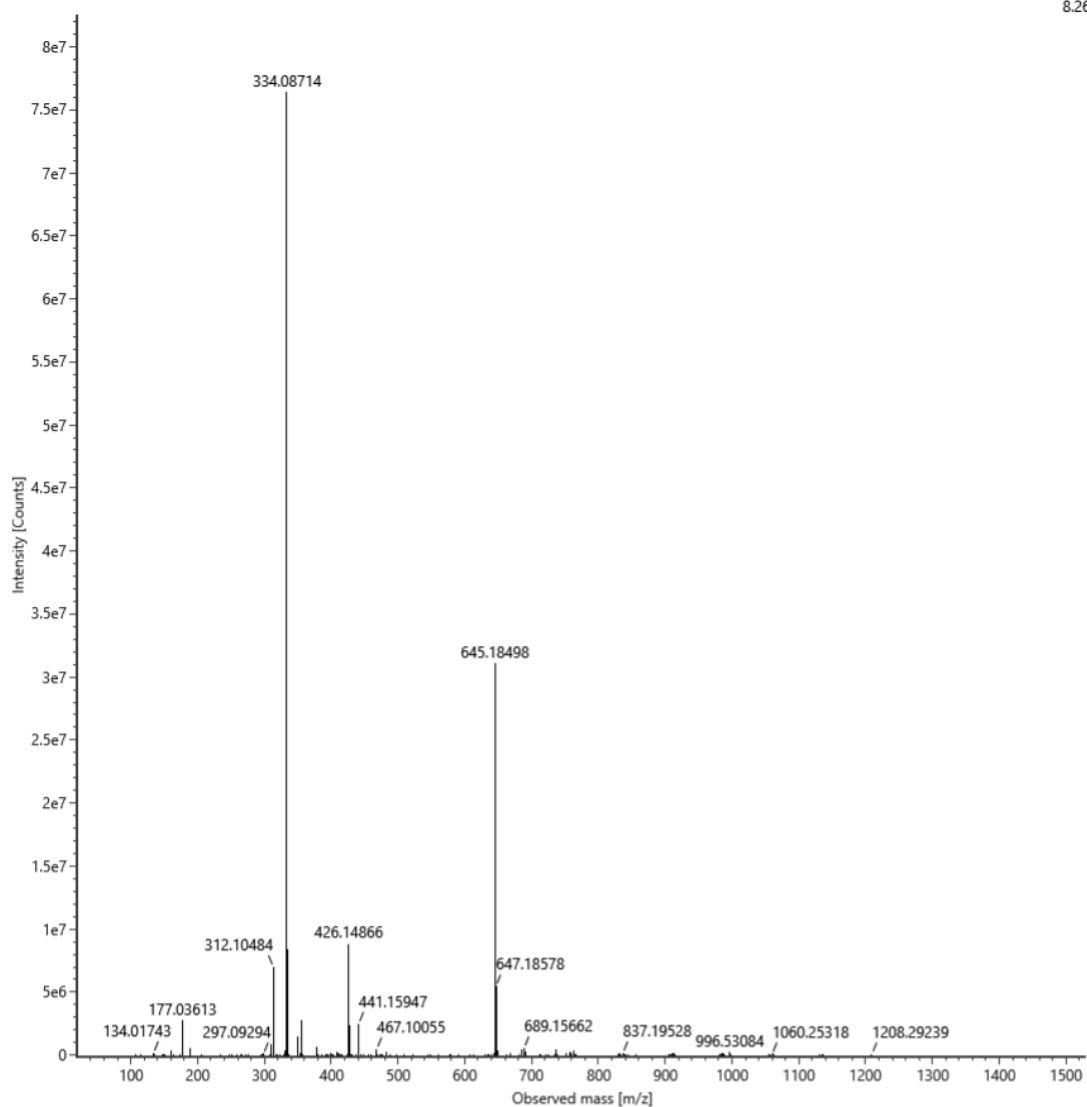

HRMS of compound 3h

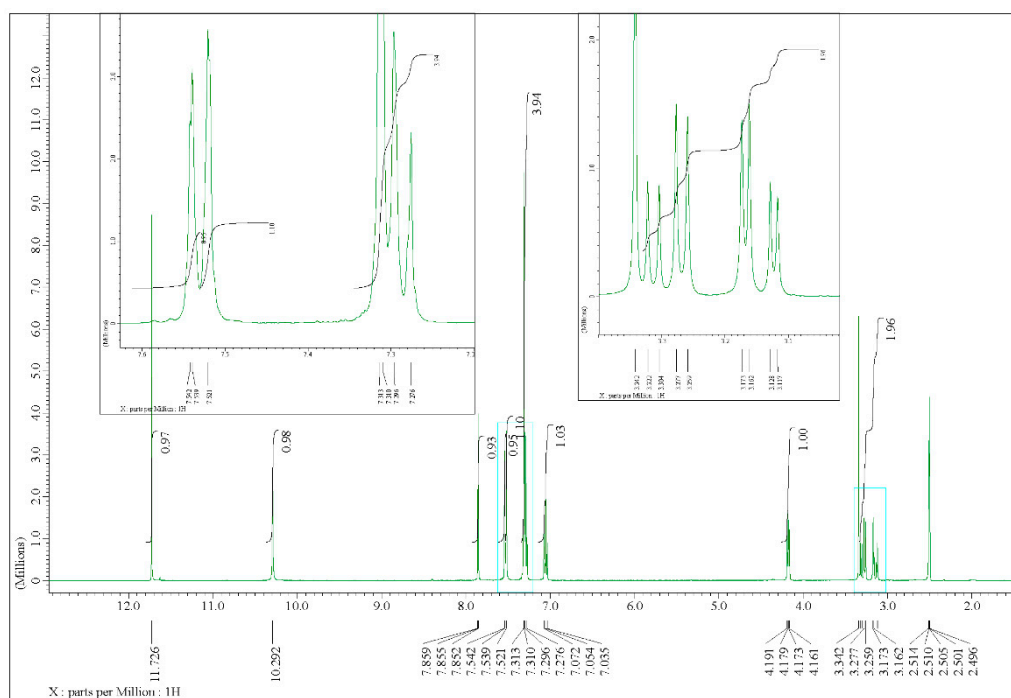

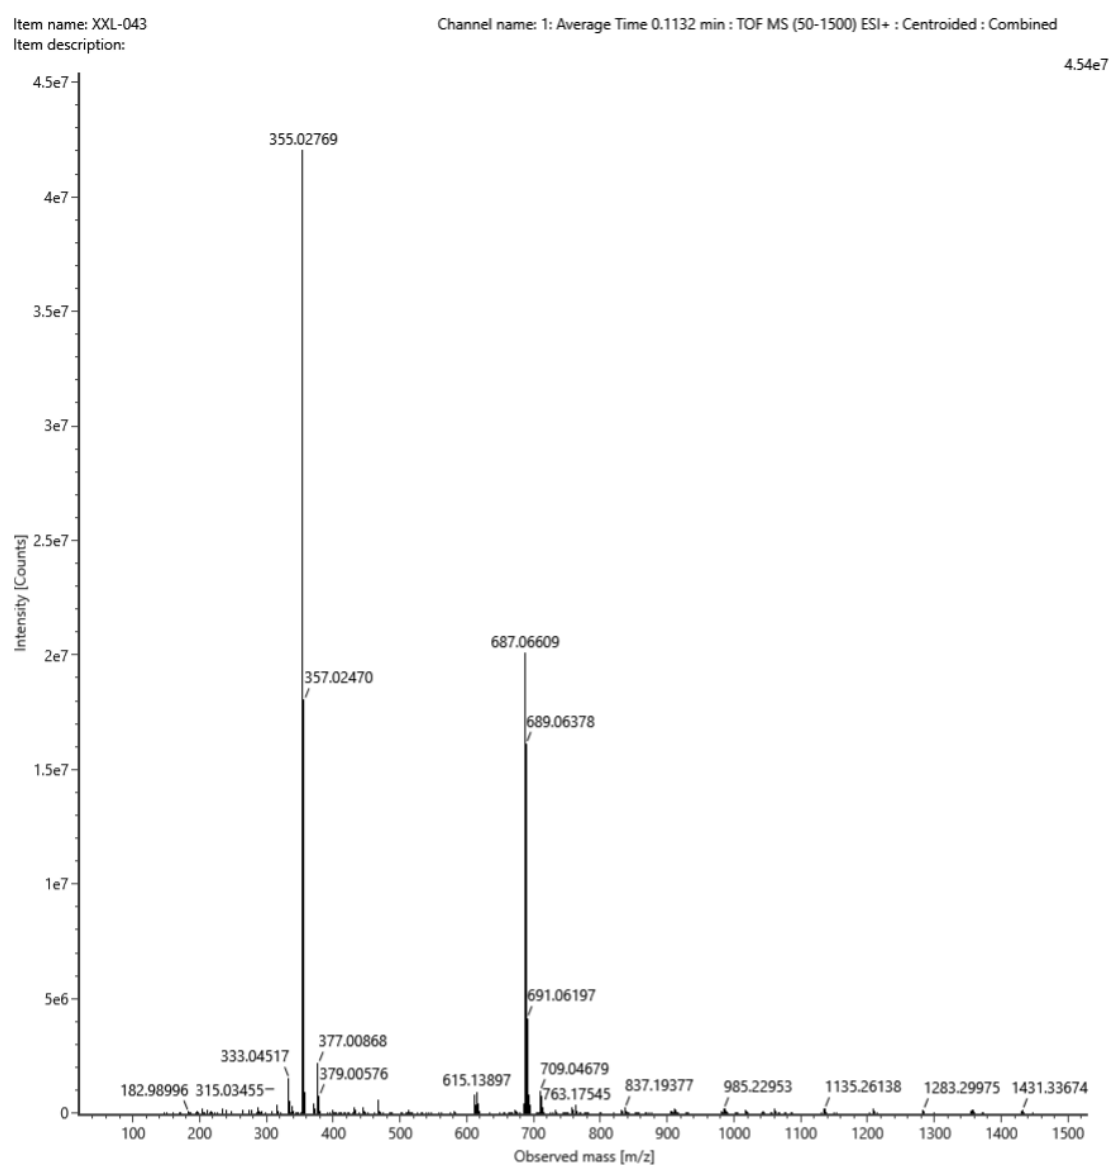

HRMS of compound 4a

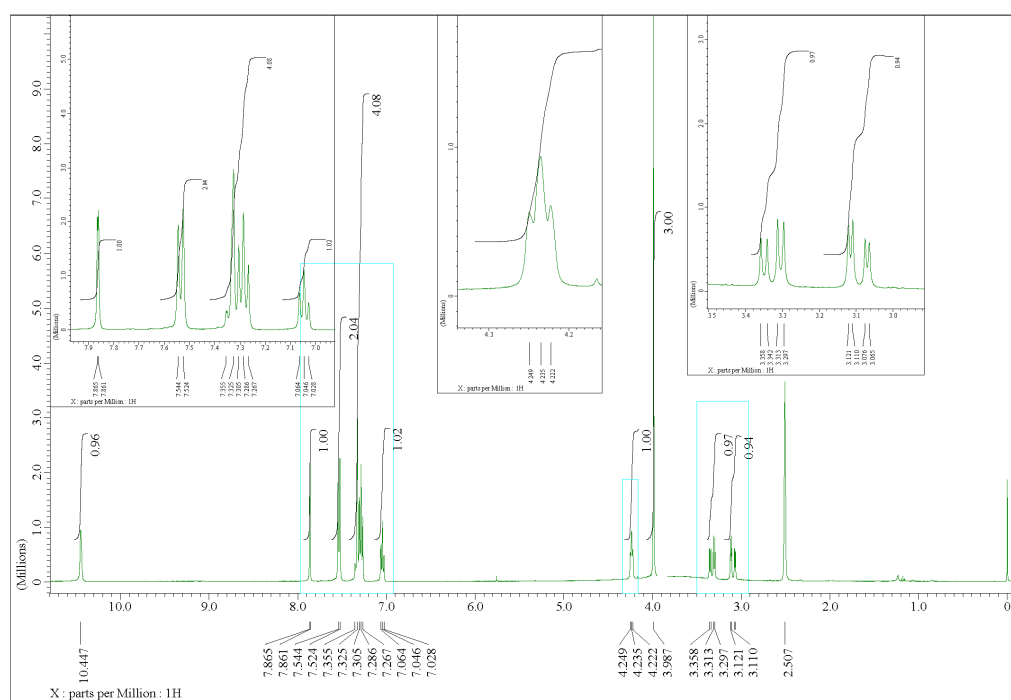 $^1\text{H}$  NMR of compound 4b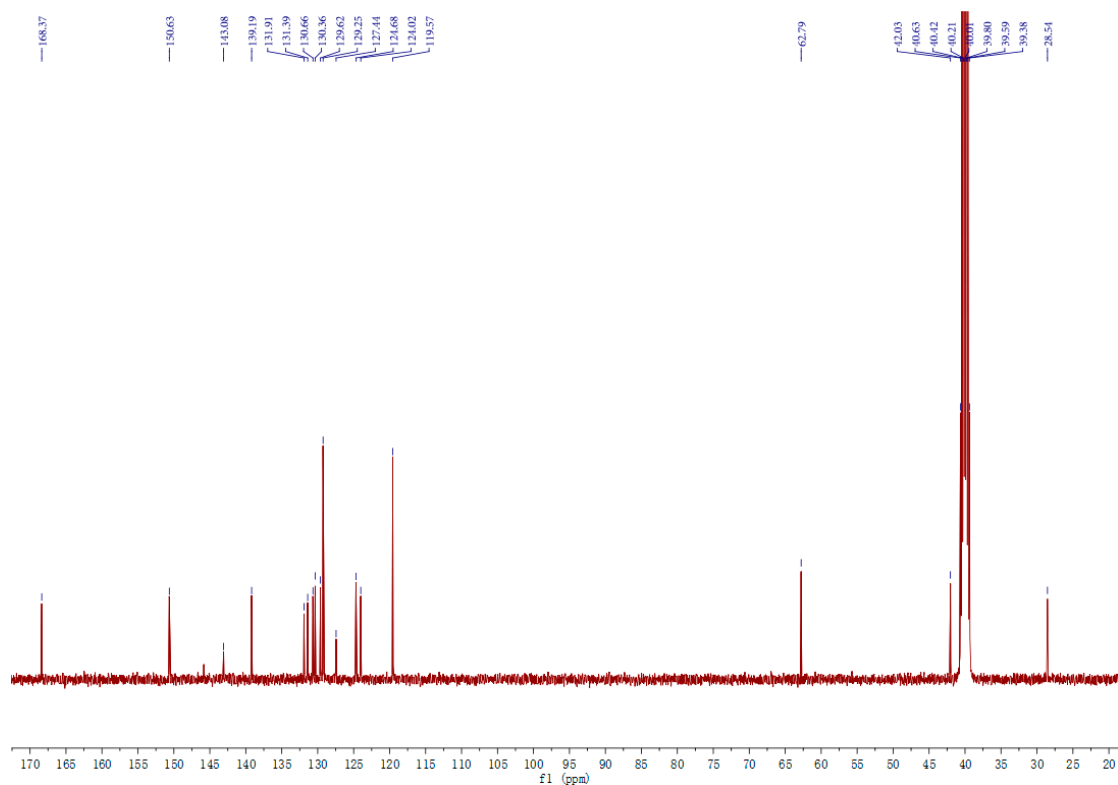 $^{13}\text{C}$  NMR of compound 4b

Item name: XXL-047  
Item description:

Channel name: 1: Average Time 0.1089 min : TOF MS (50-1500) ESI+ : Centroided : Combined

5.91e7

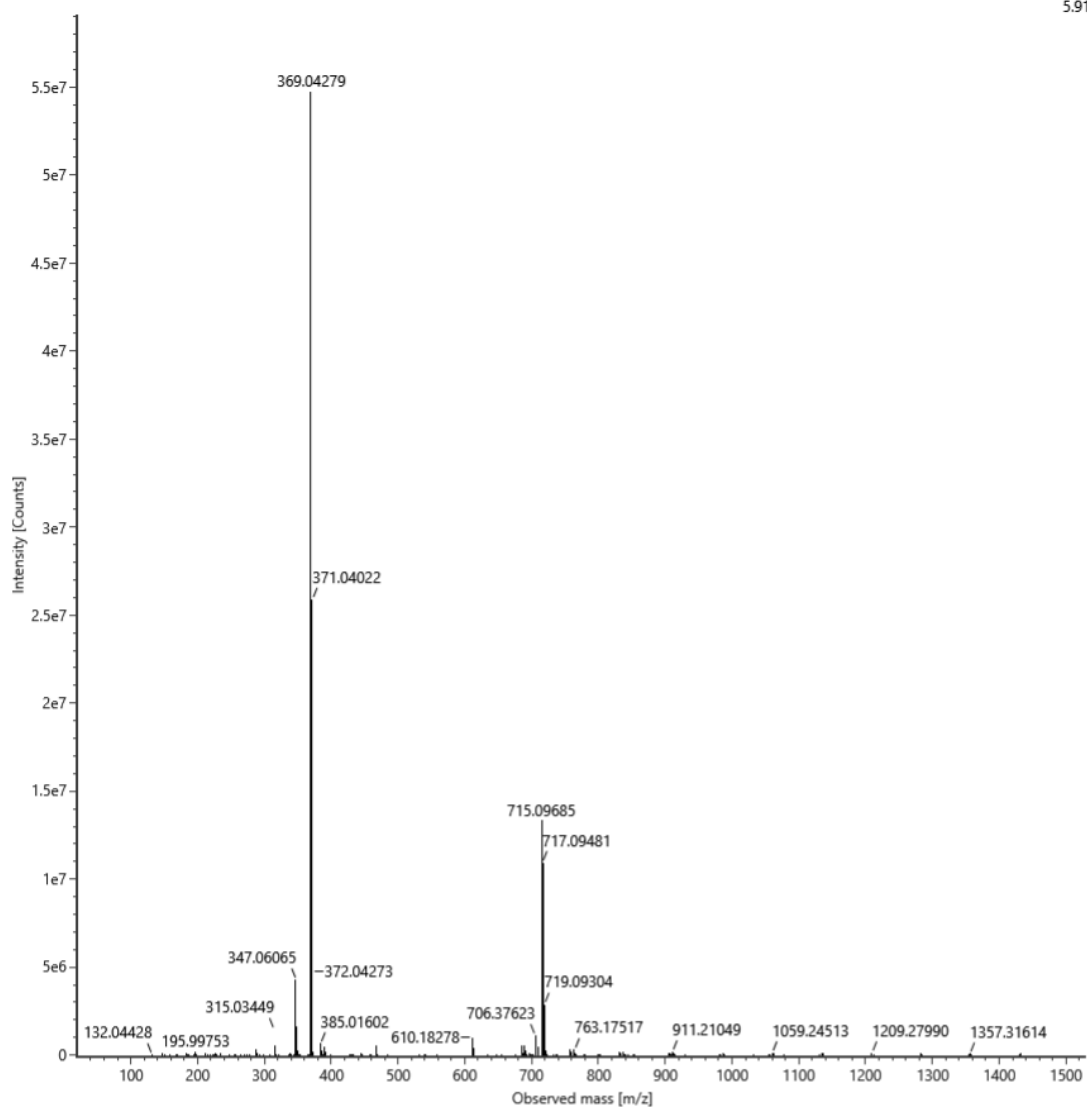

HRMS of compound 4b

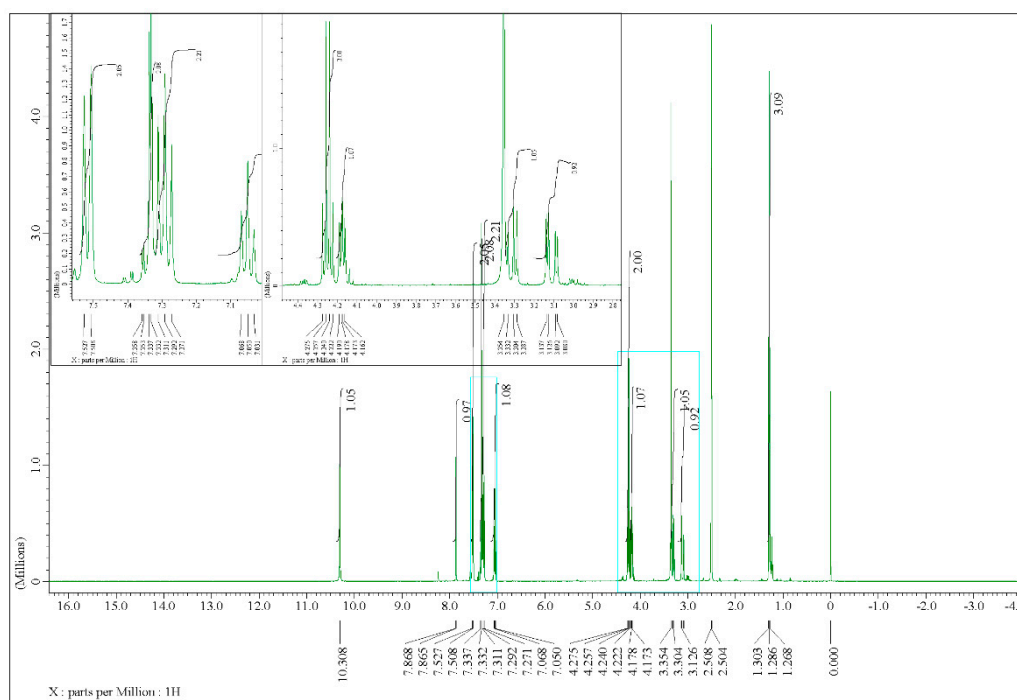 $^1\text{H}$  NMR of compound 4c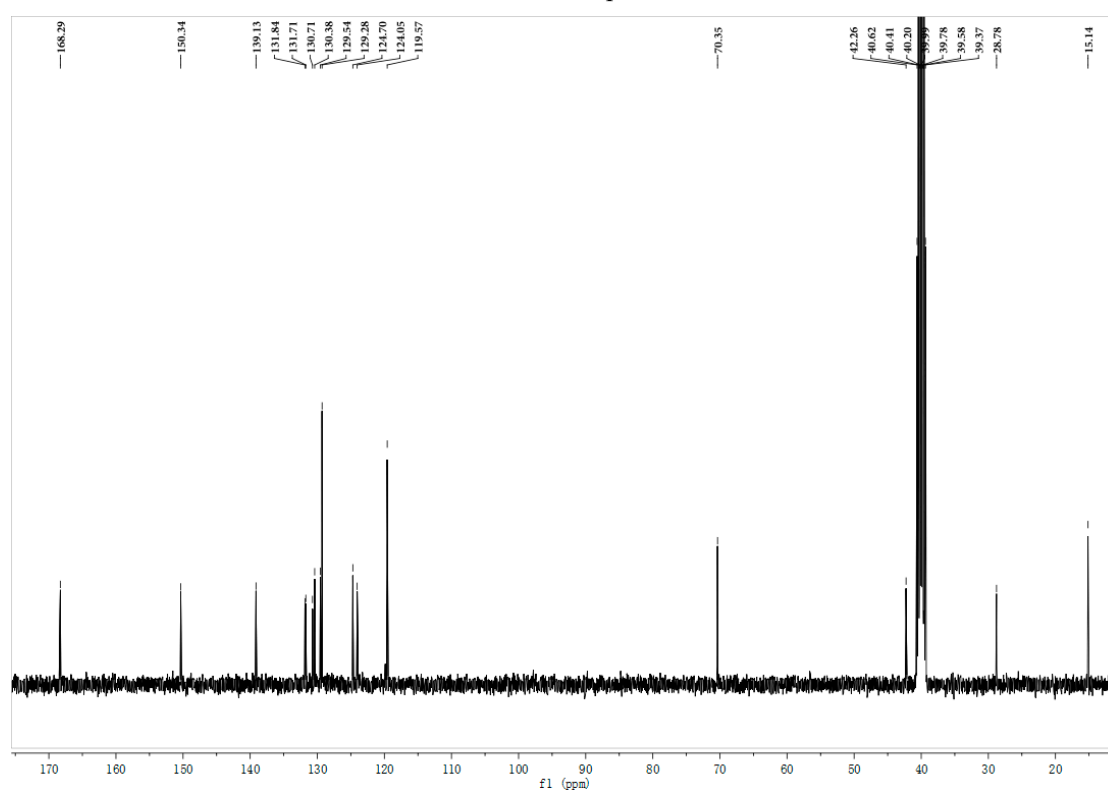 $^{13}\text{C}$  NMR of compound 4c

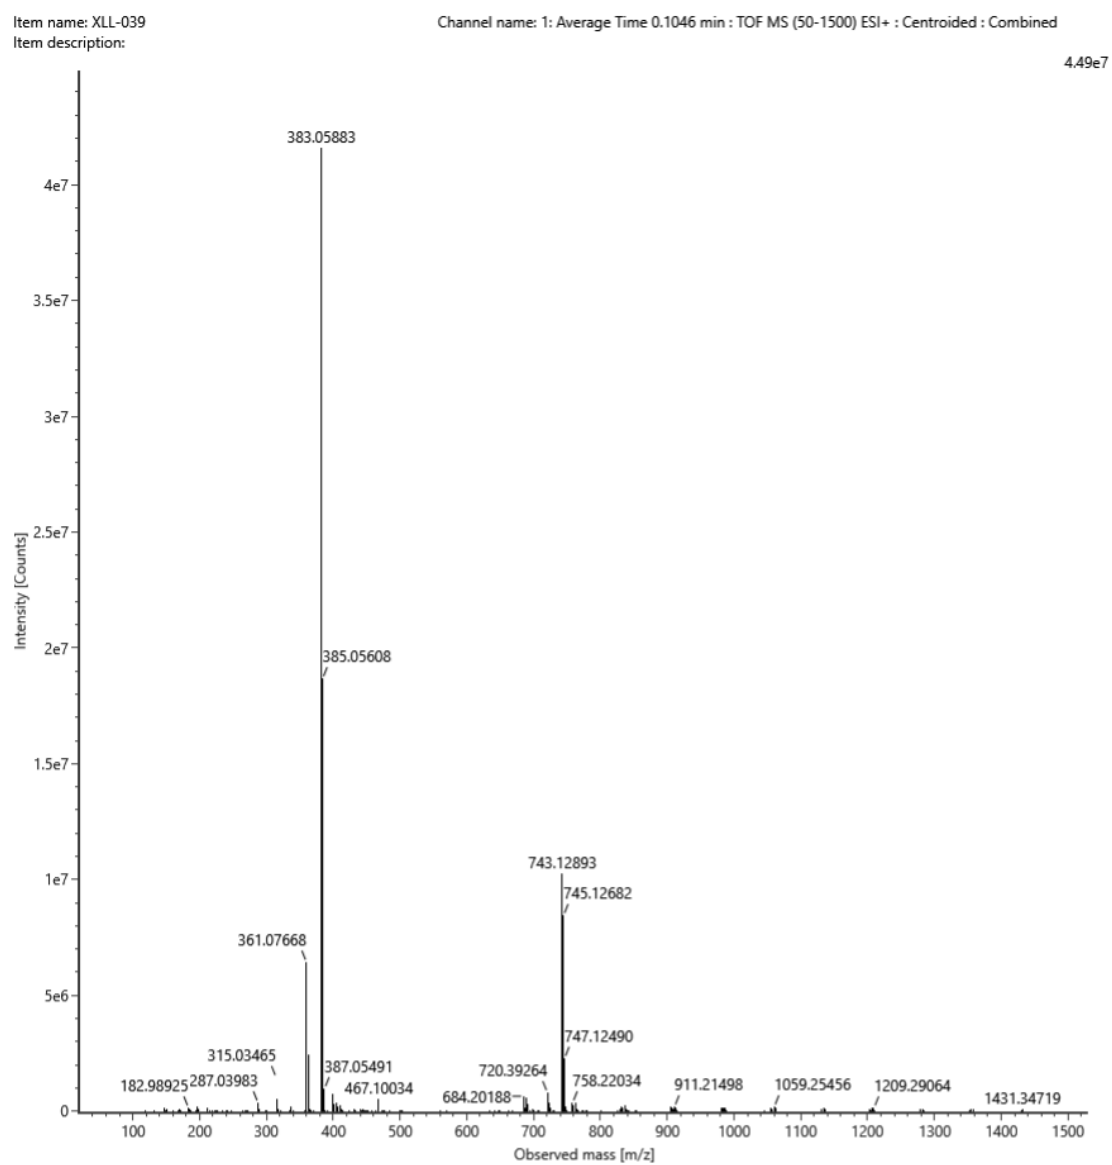

HRMS of compound 4c

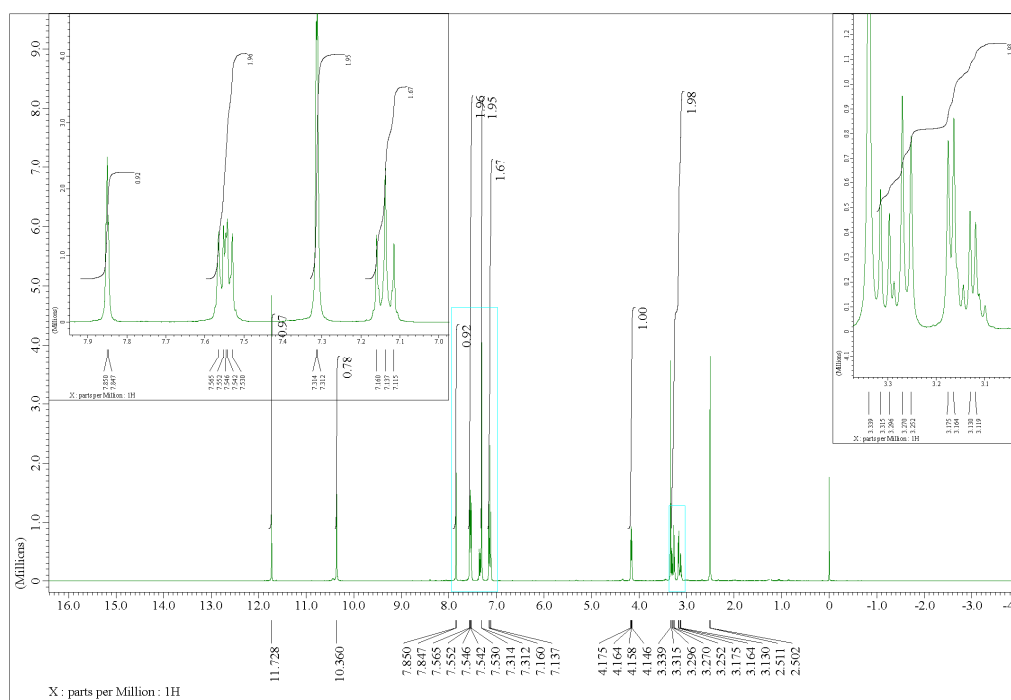<sup>1</sup>H NMR of compound 4d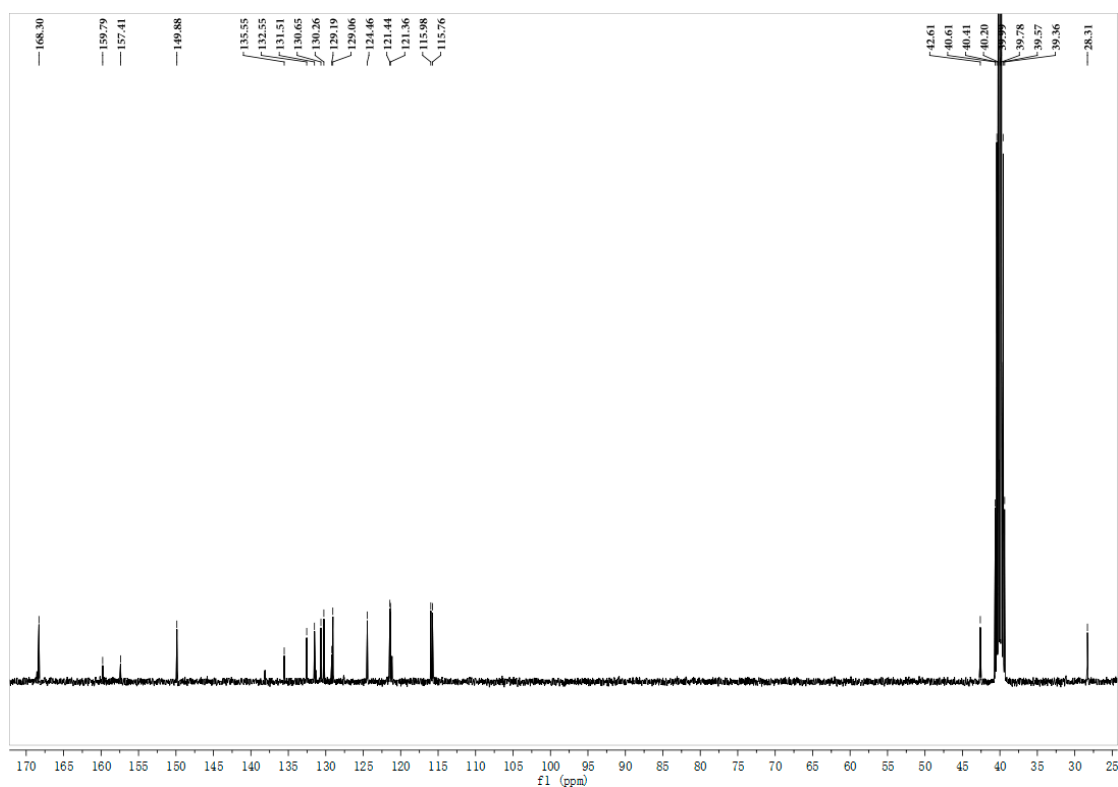<sup>13</sup>C NMR of compound 4d



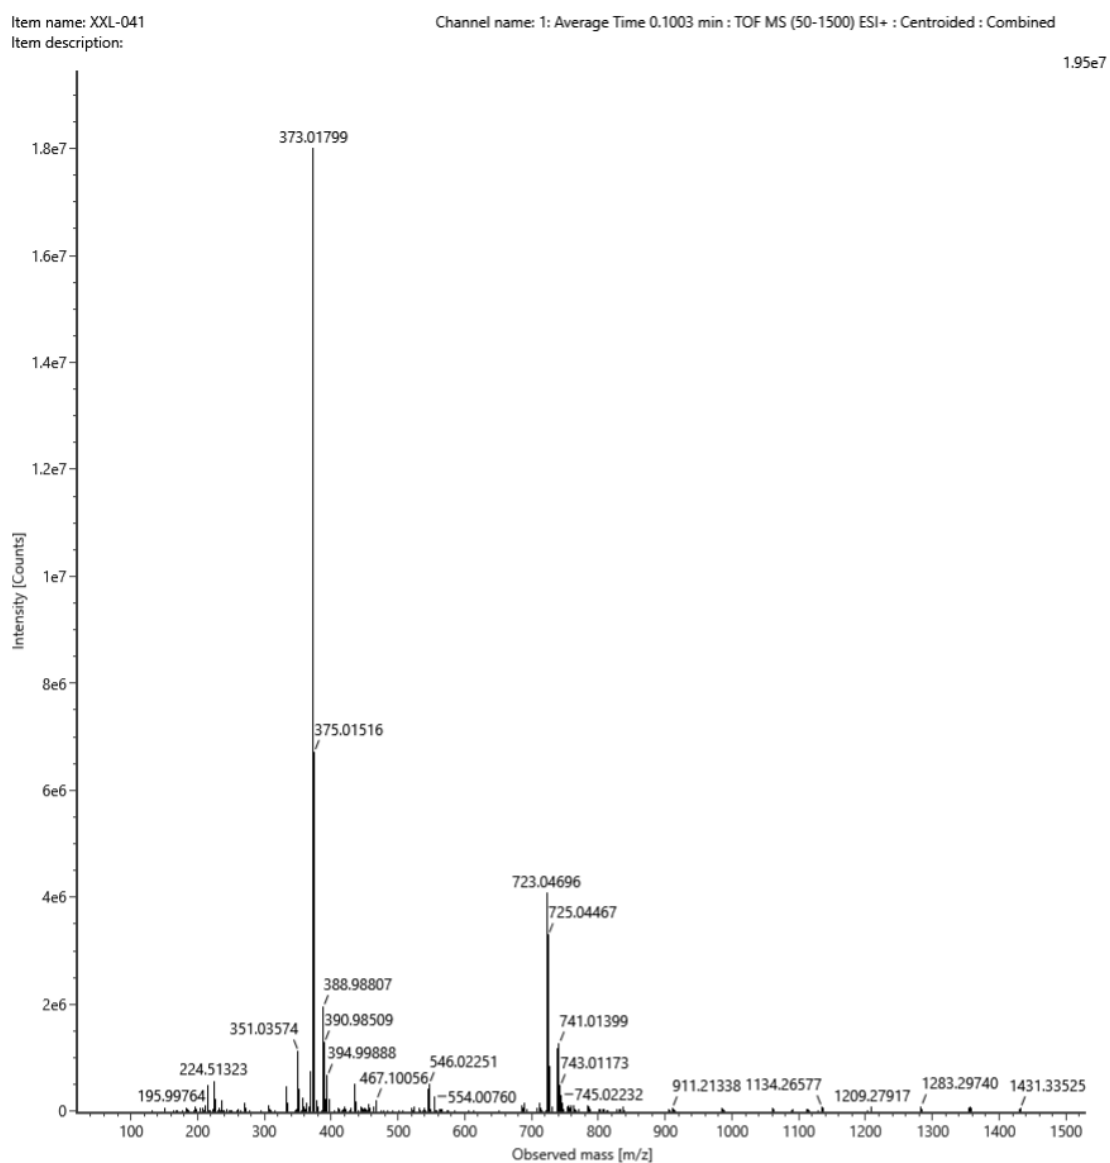

HRMS of compound 4d

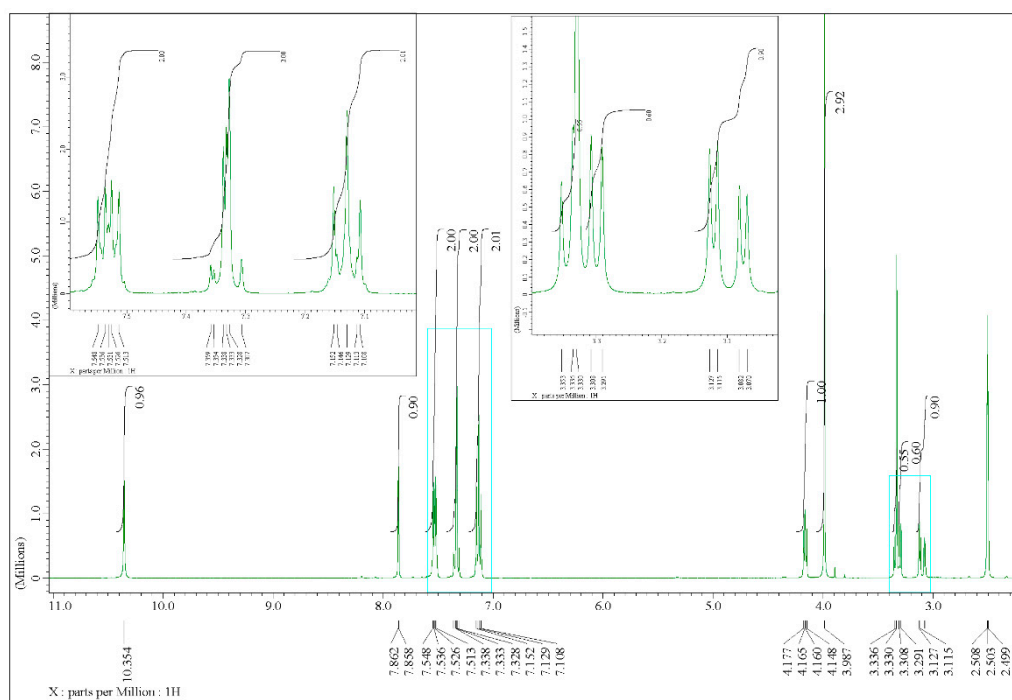 $^1\text{H}$  NMR of compound 4e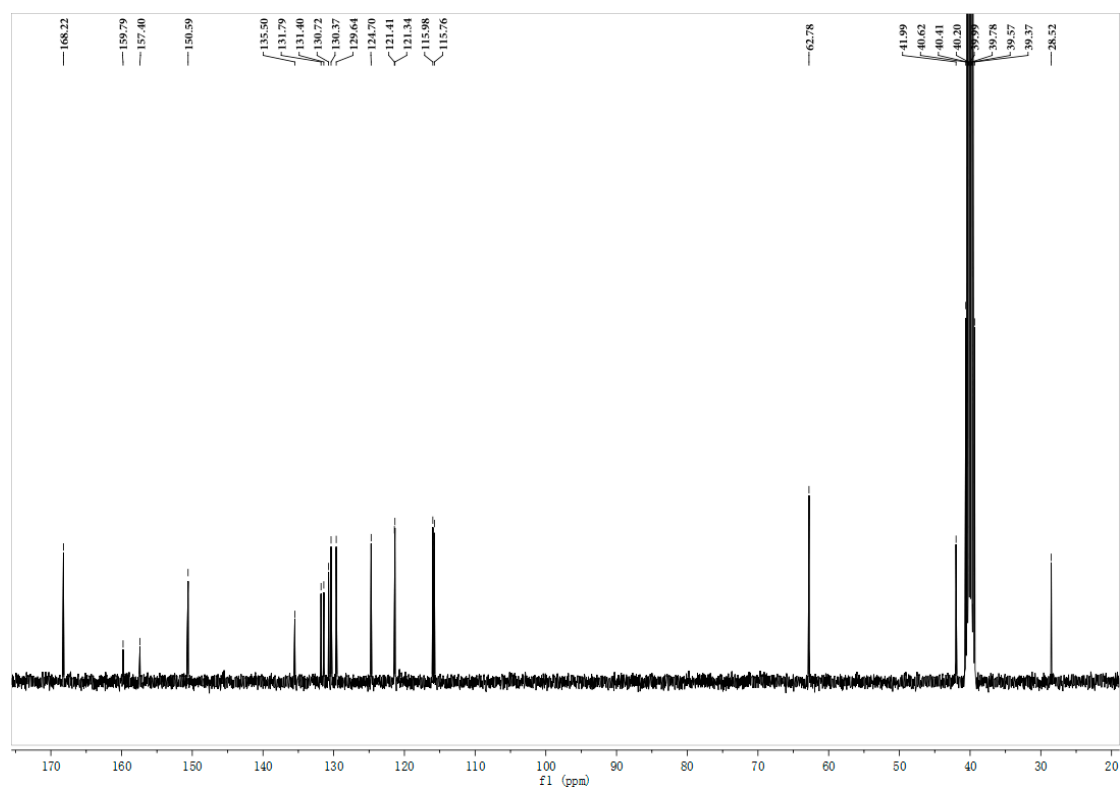 $^{13}\text{C}$  NMR of compound 4e

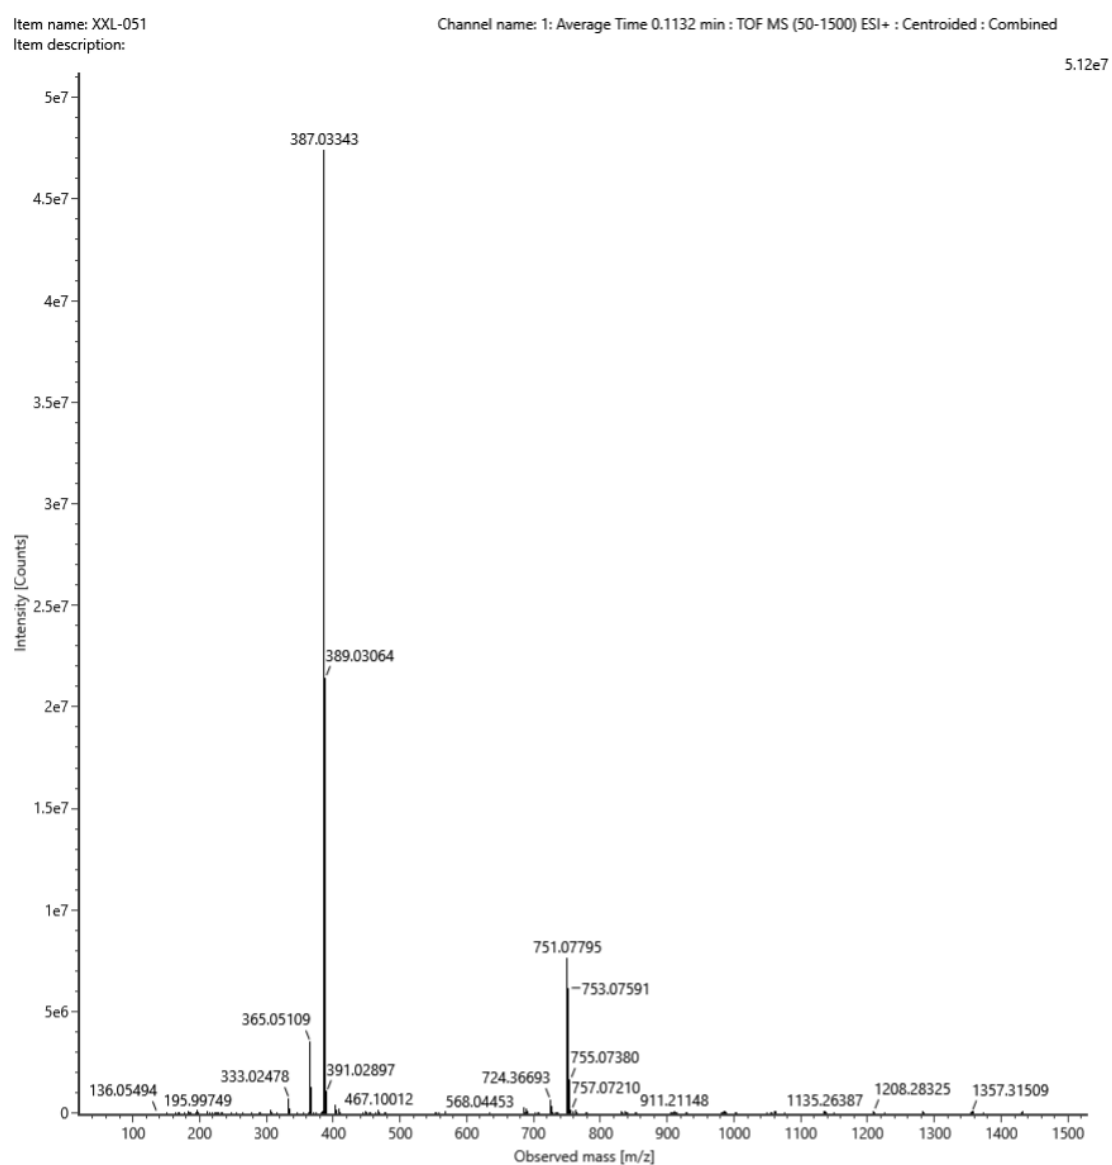

HRMS of compound 4e

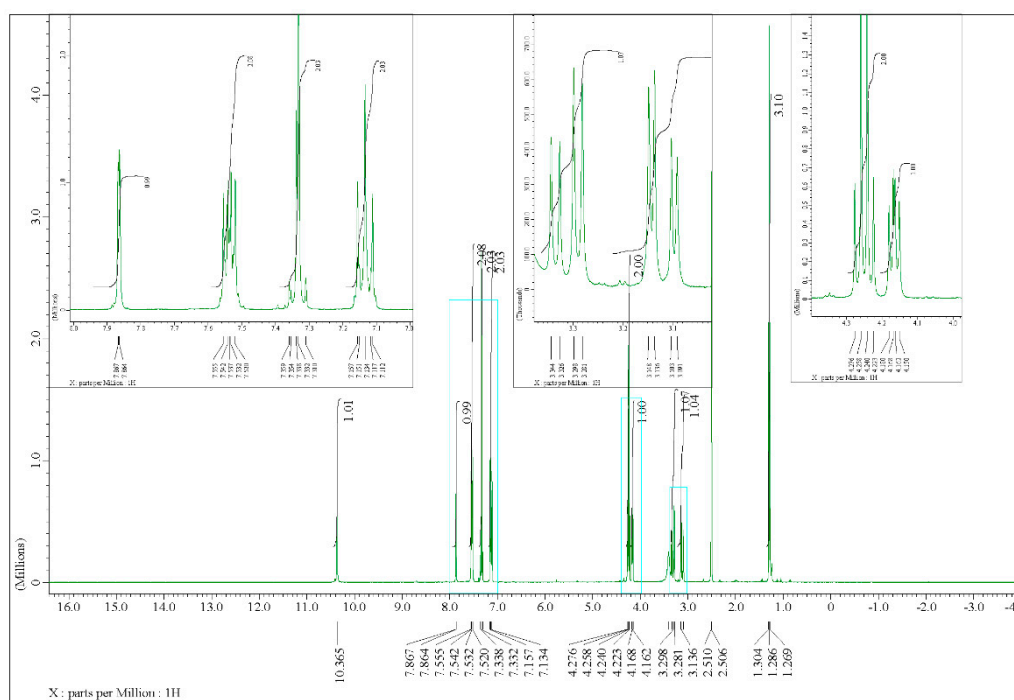 $^1\text{H}$  NMR of compound 4f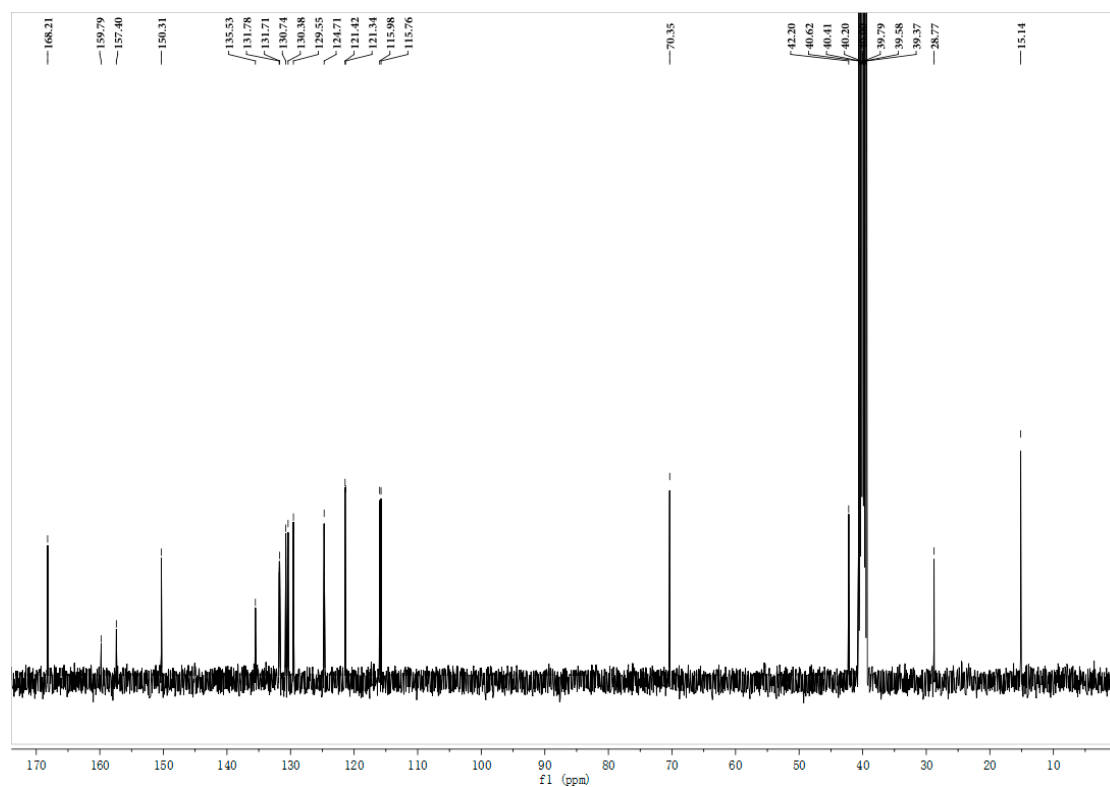 $^{13}\text{C}$  NMR of compound 4f

Item name: XLL-067  
Item description:

Channel name: 1: Average Time 0.1003 min : TOF MS (50-1500) ESI+ : Centroided : Combined

1.43e7

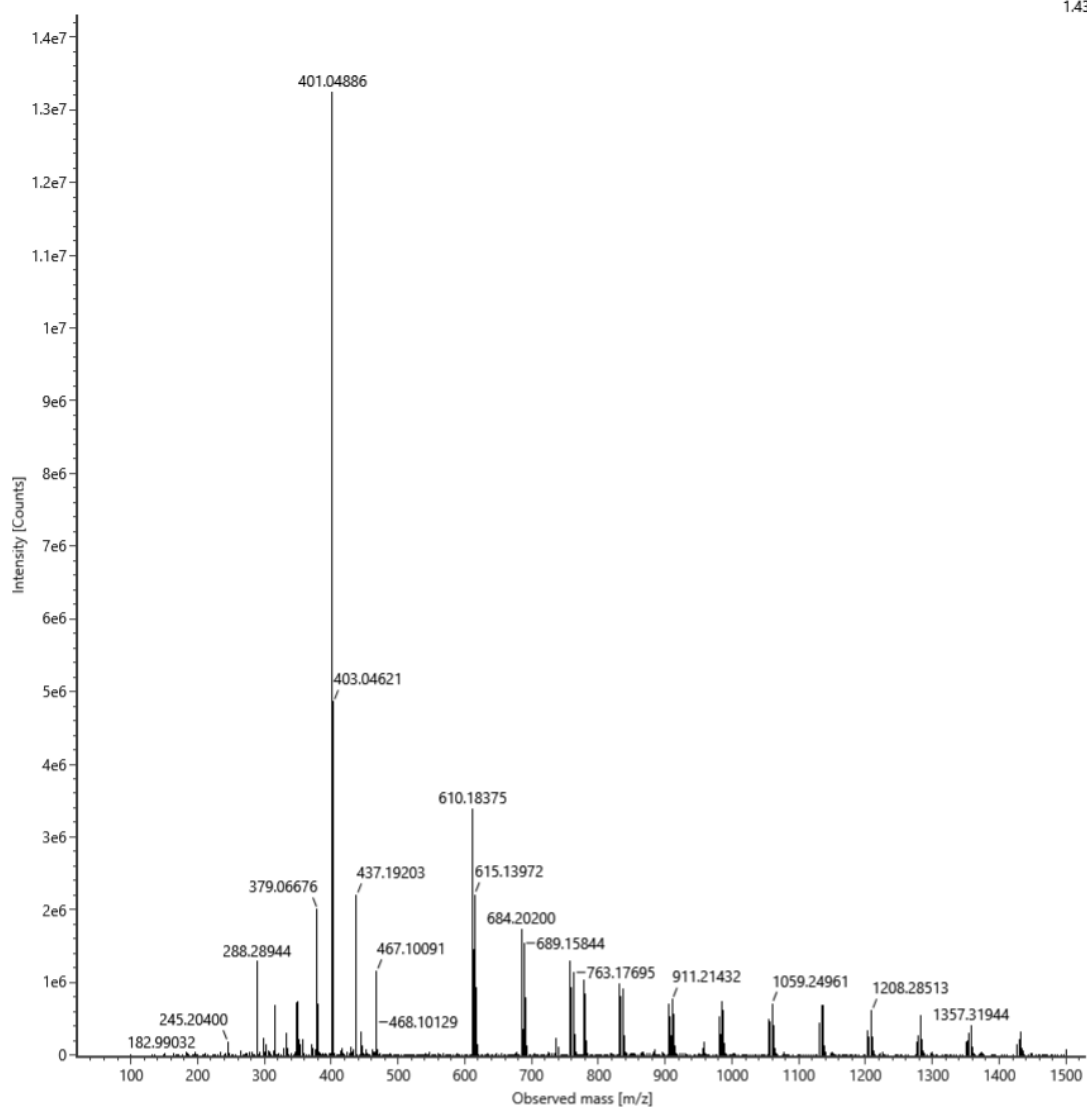

HRMS of compound 4f

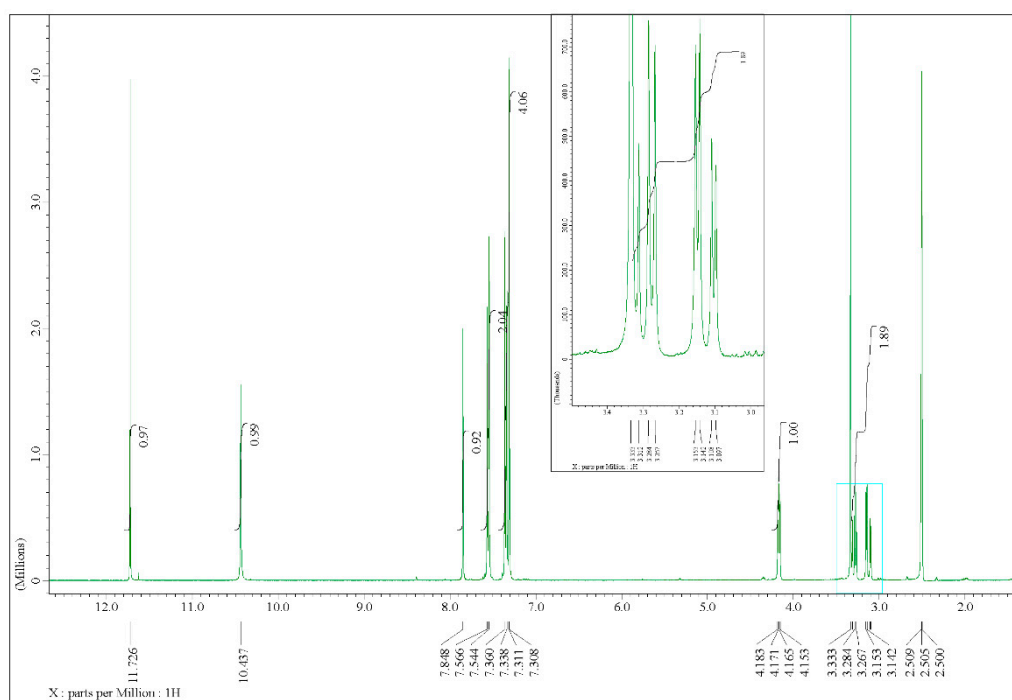 $^1\text{H}$  NMR of compound 4g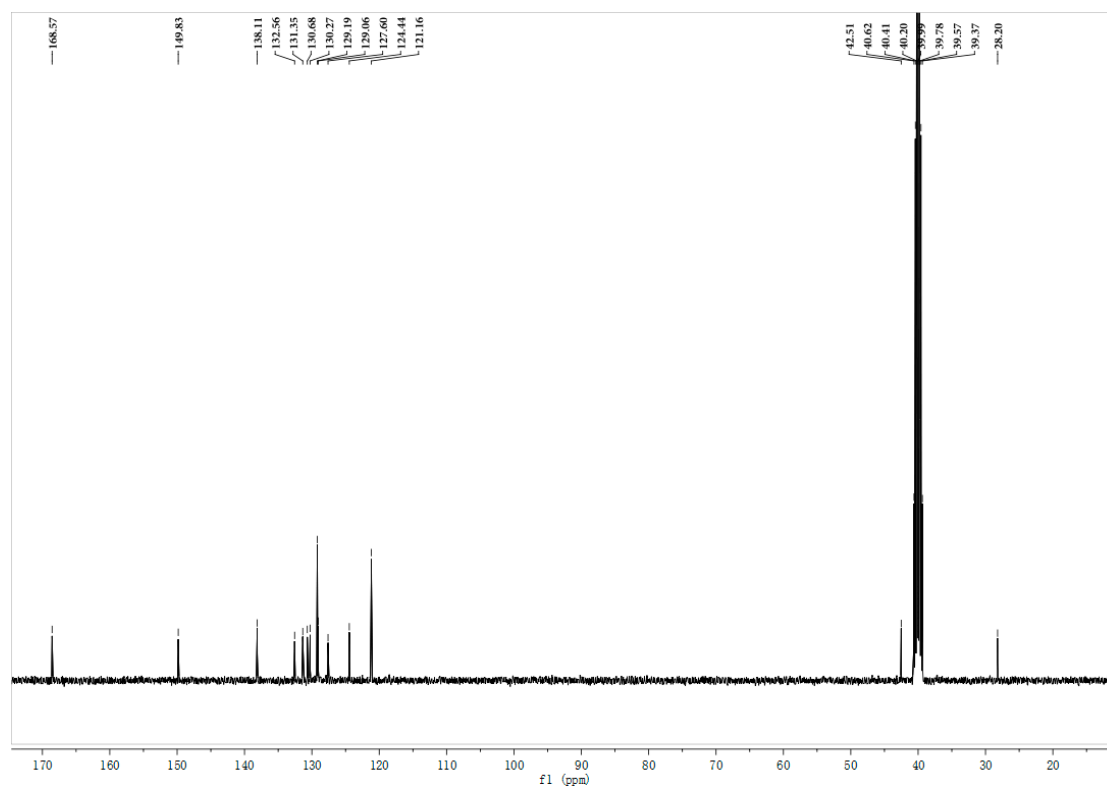 $^{13}\text{C}$  NMR of compound 4g

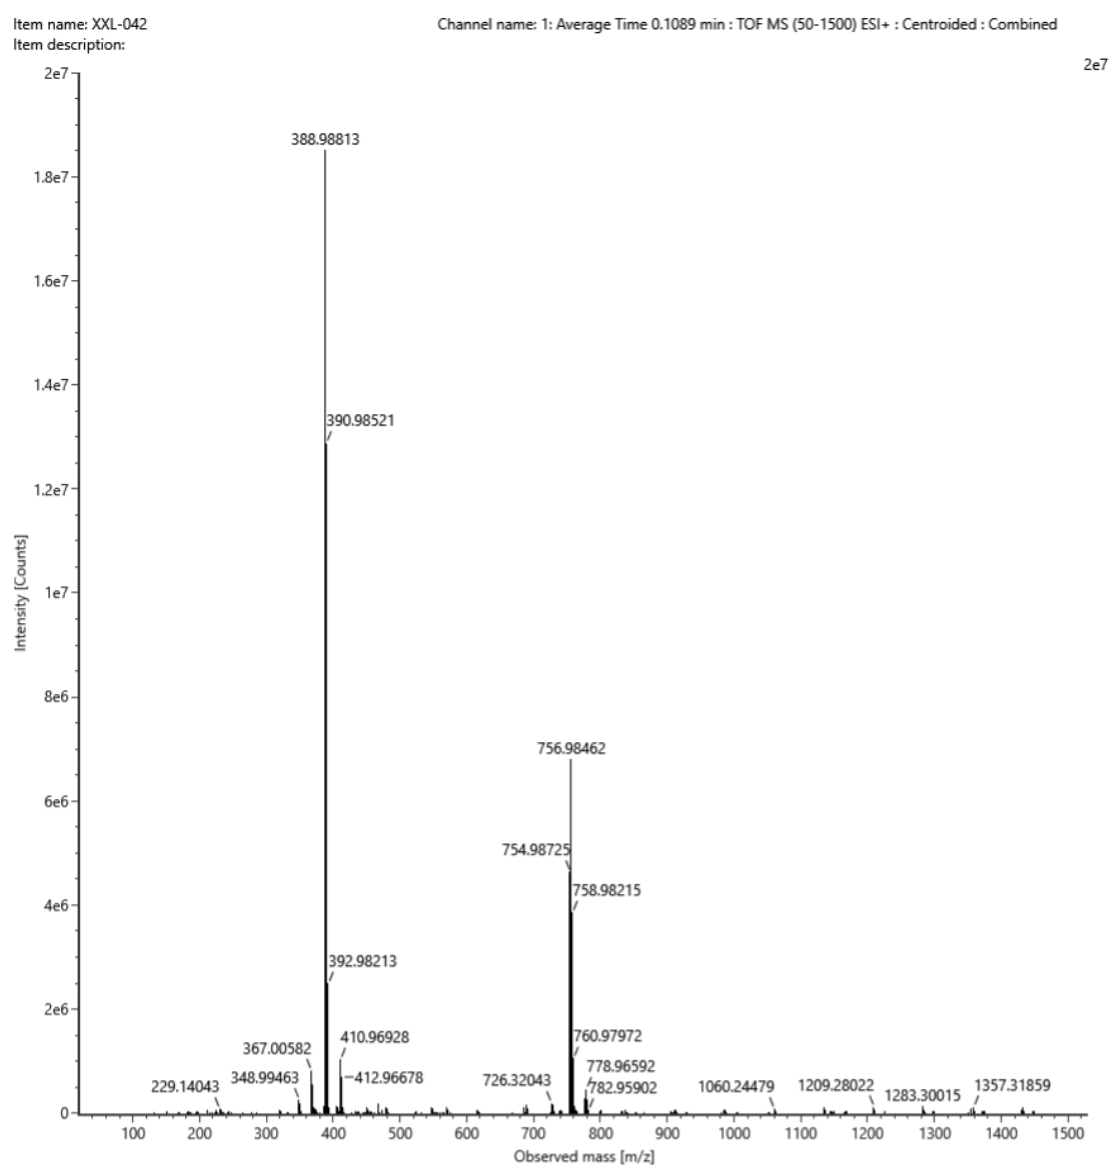

HRMS of compound 4g

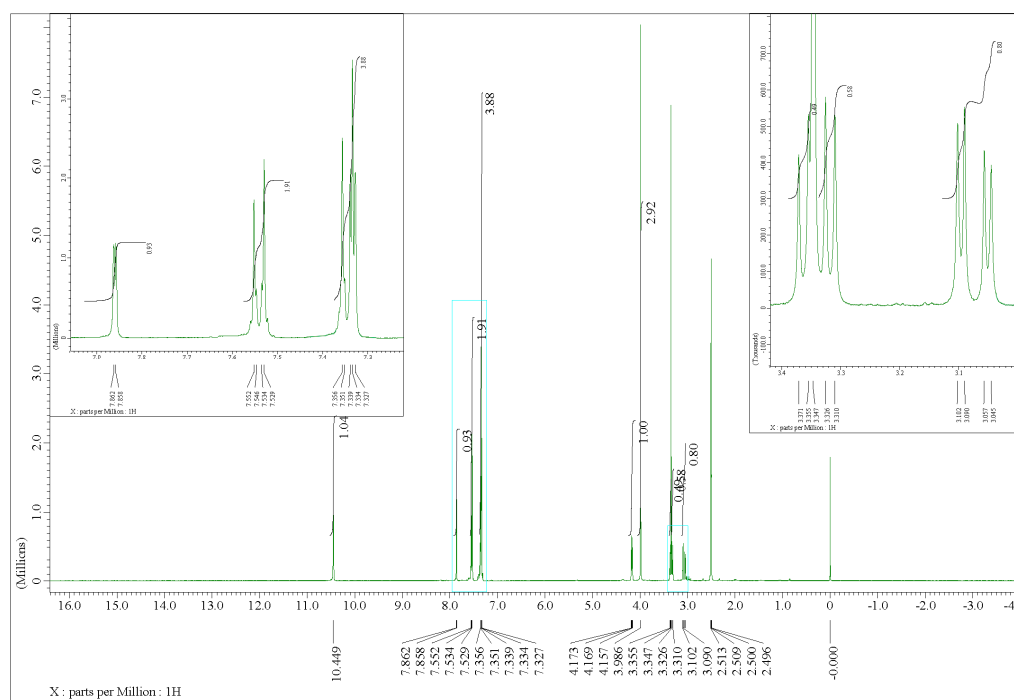<sup>1</sup>H NMR of compound 4h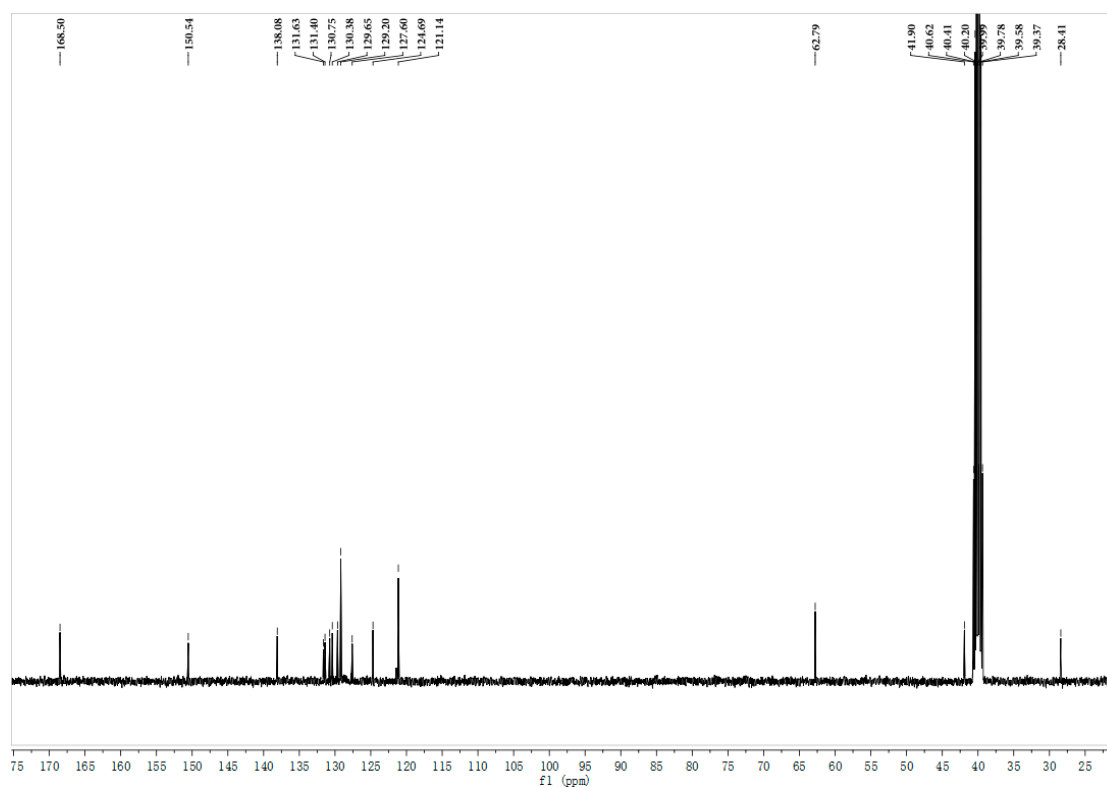<sup>13</sup>C NMR of compound 4h



Item name: XLL-037  
Item description:

Channel name: 1: Average Time 0.1089 min : TOF MS (50-1500) ESI+ : Centroided : Combined

4.47e7

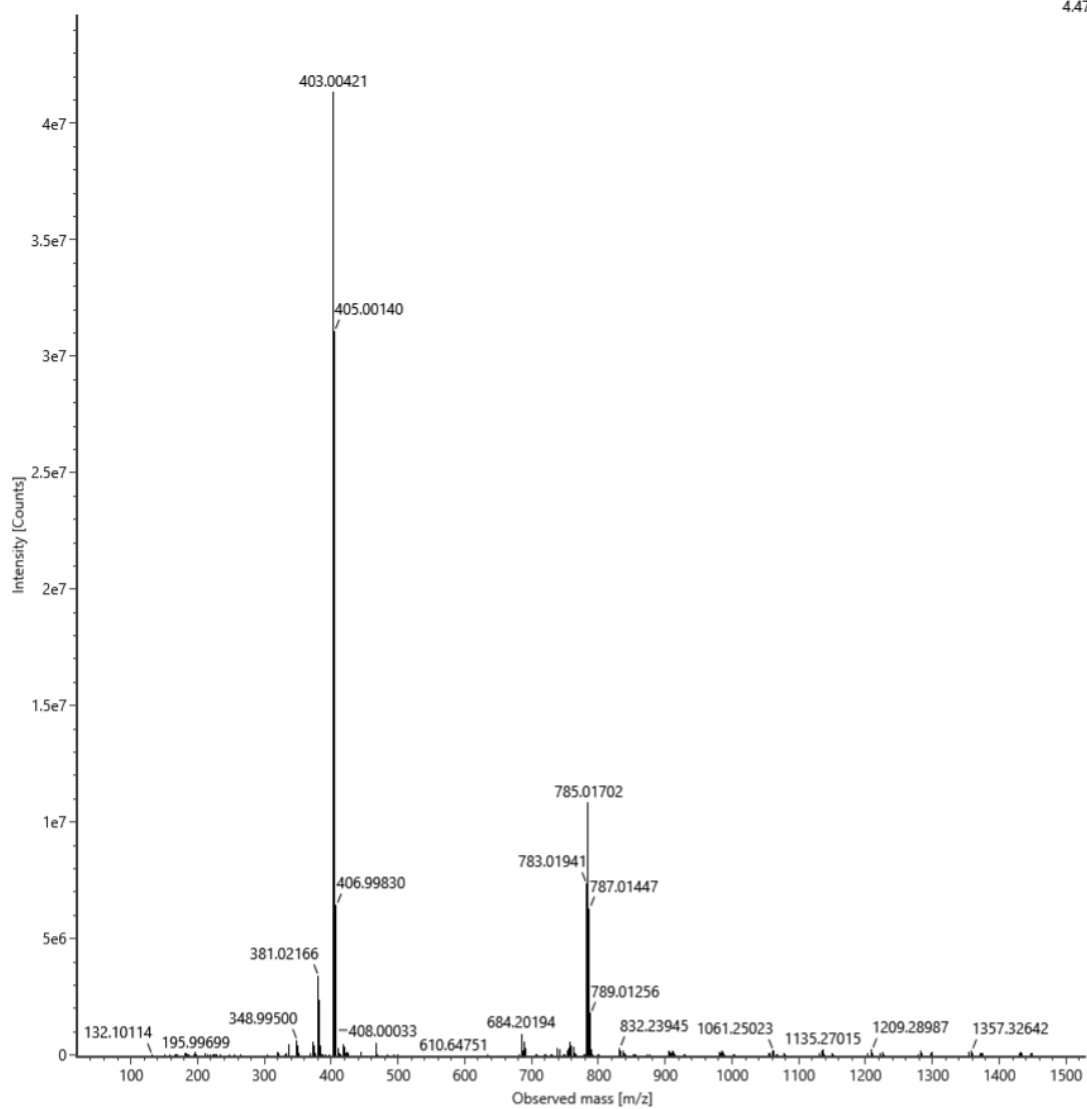

HRMS of compound 4h

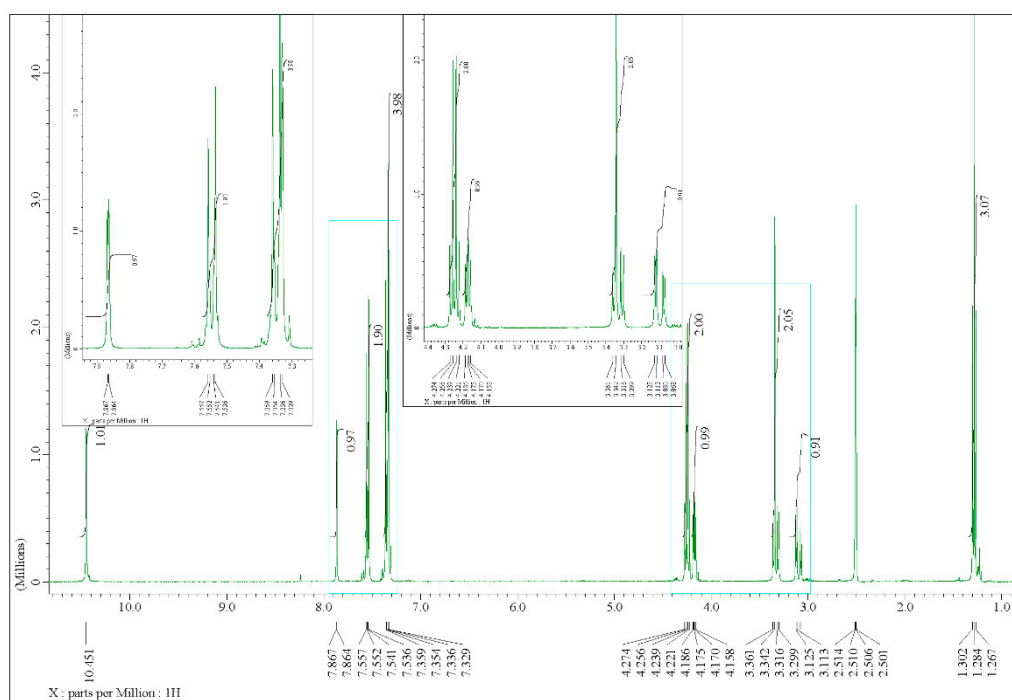<sup>1</sup>H NMR of compound 4i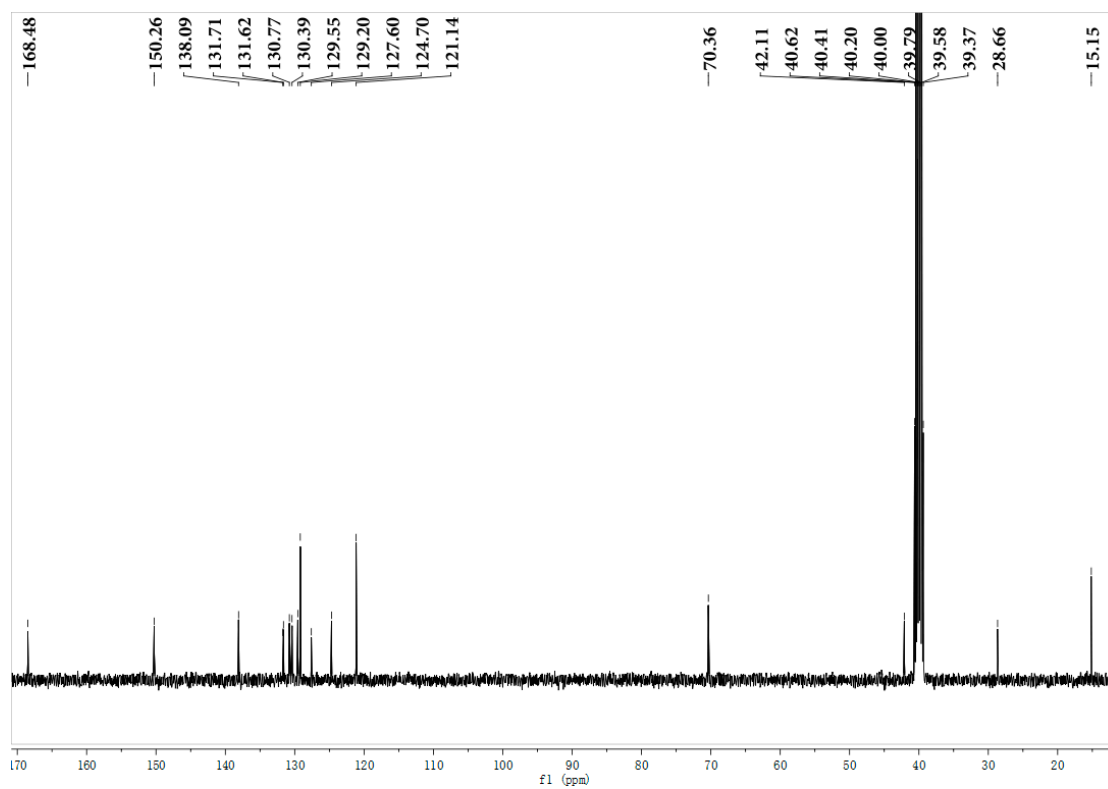<sup>13</sup>C NMR of compound 4i

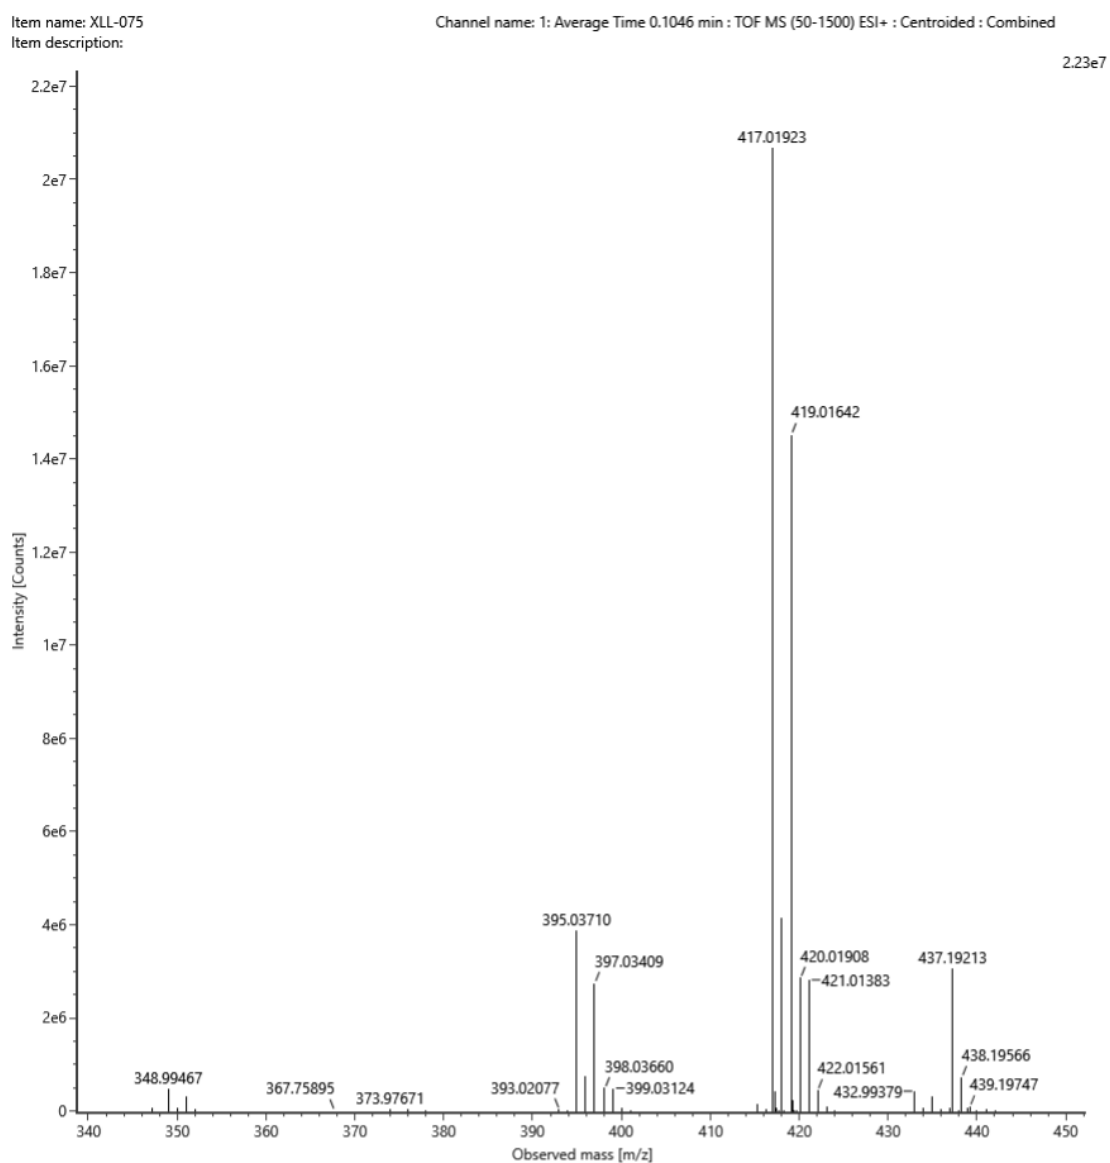

HRMS of compound 4i

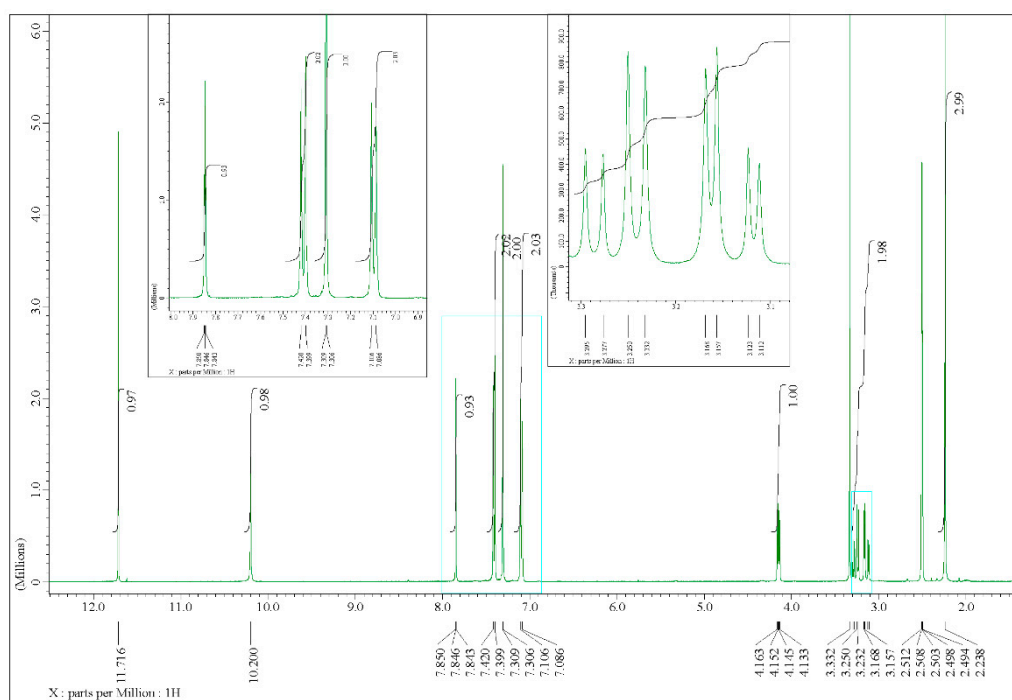<sup>1</sup>H NMR of compound 4j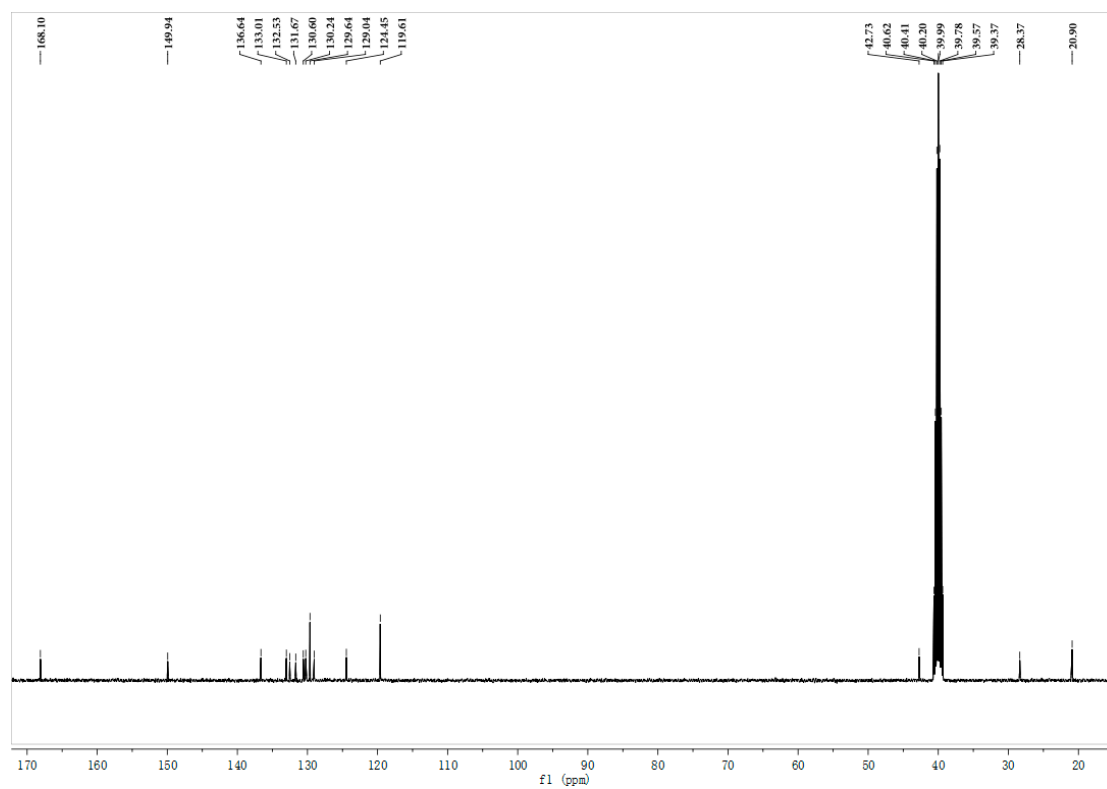<sup>13</sup>C NMR of compound 4j

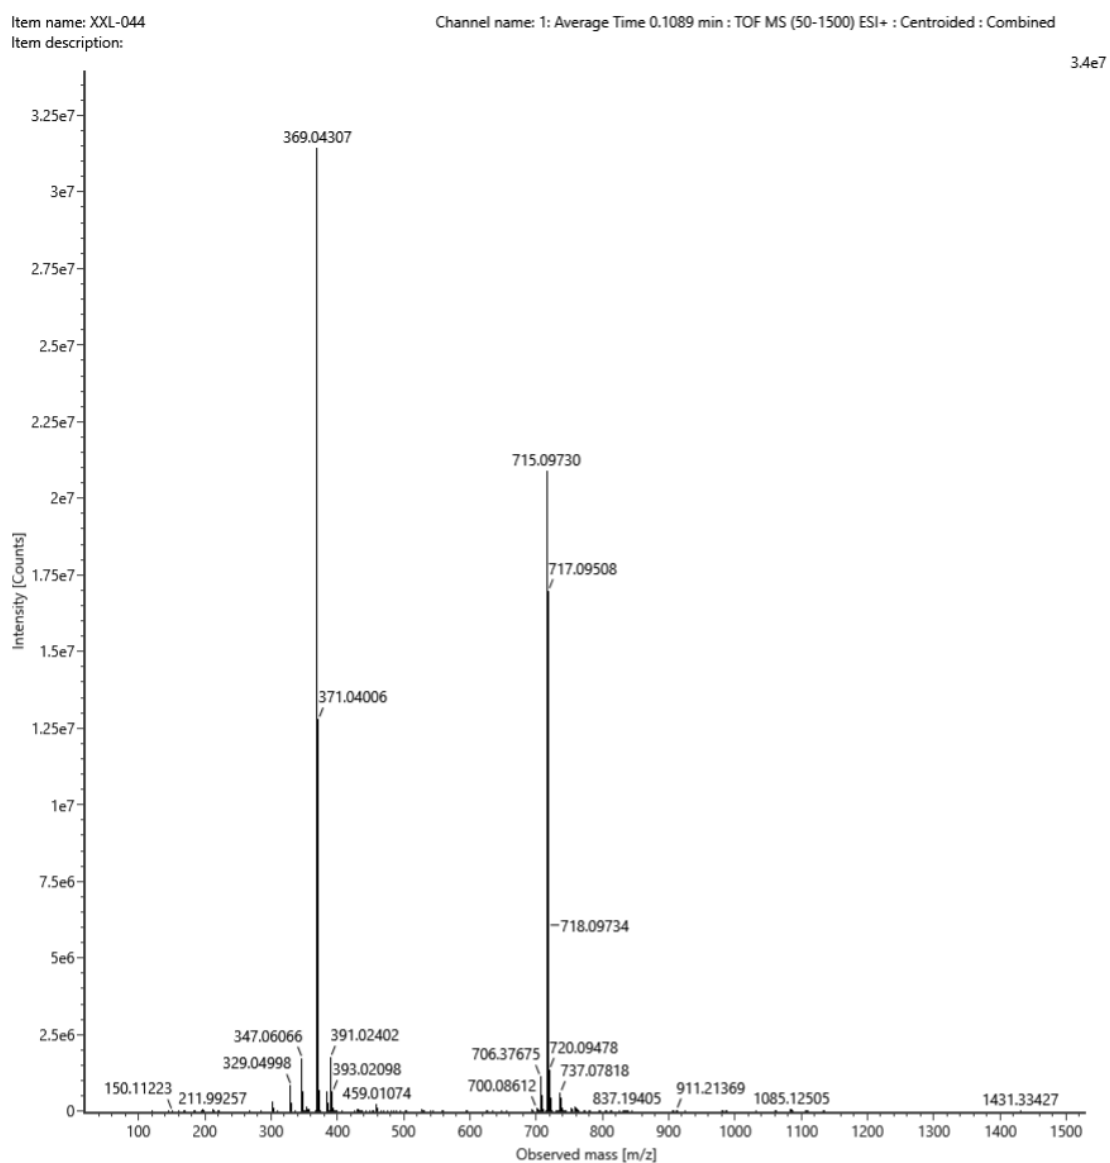

HRMS of compound 4j

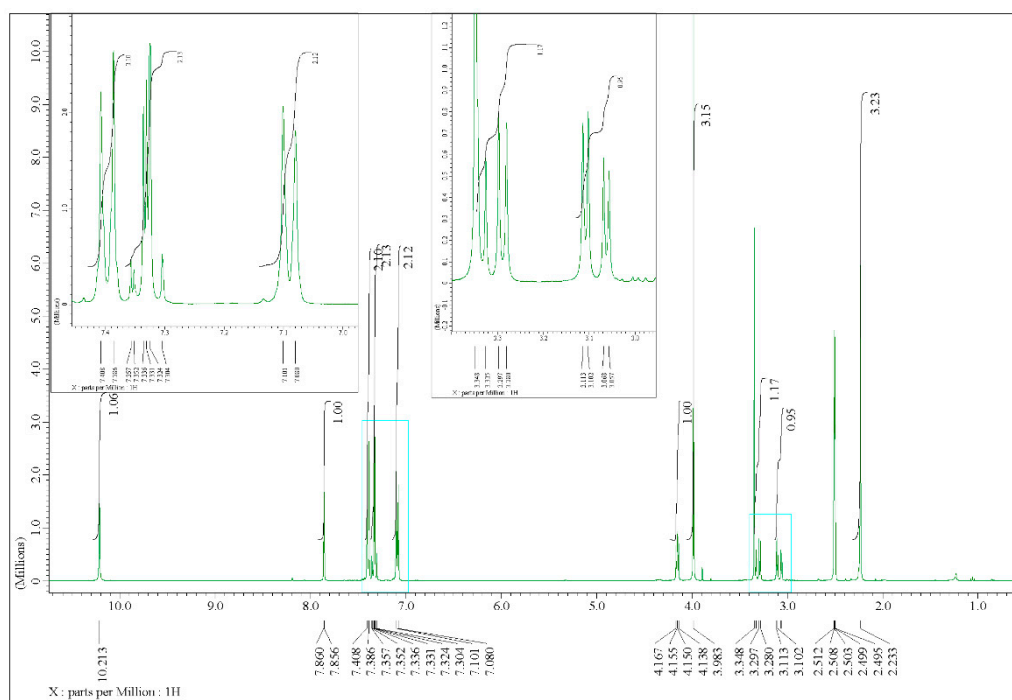<sup>1</sup>H NMR of compound 4k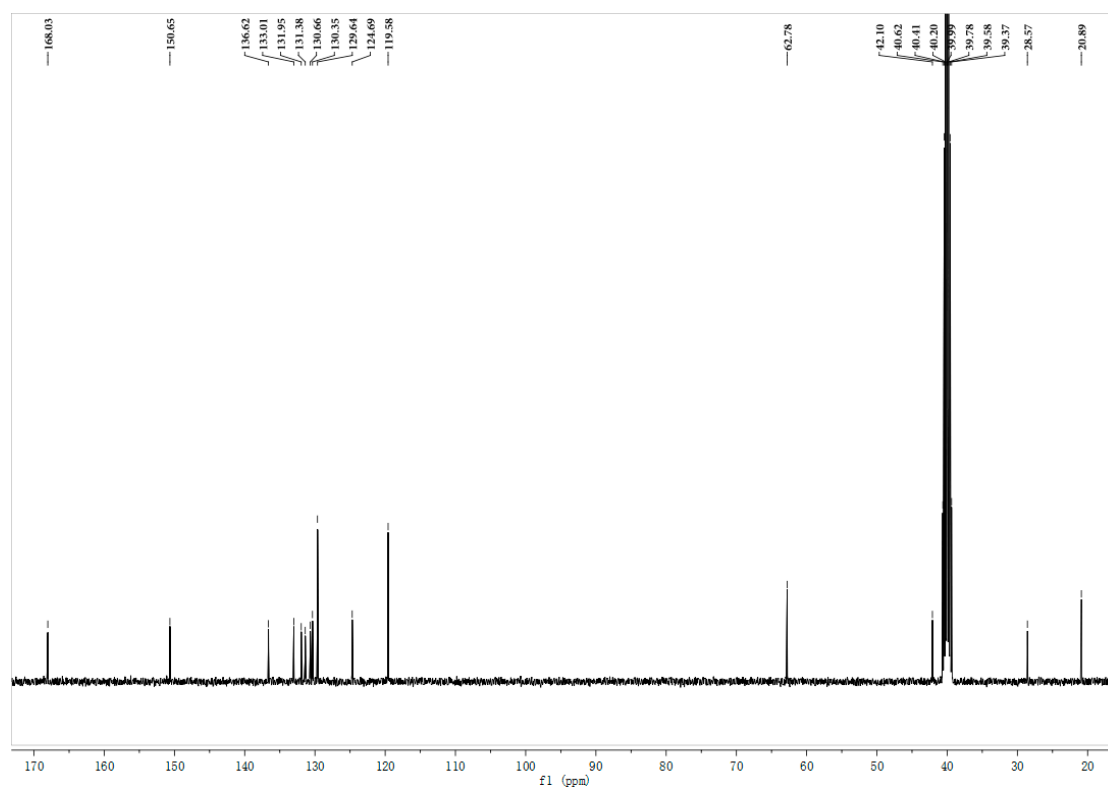<sup>13</sup>C NMR of compound 4k

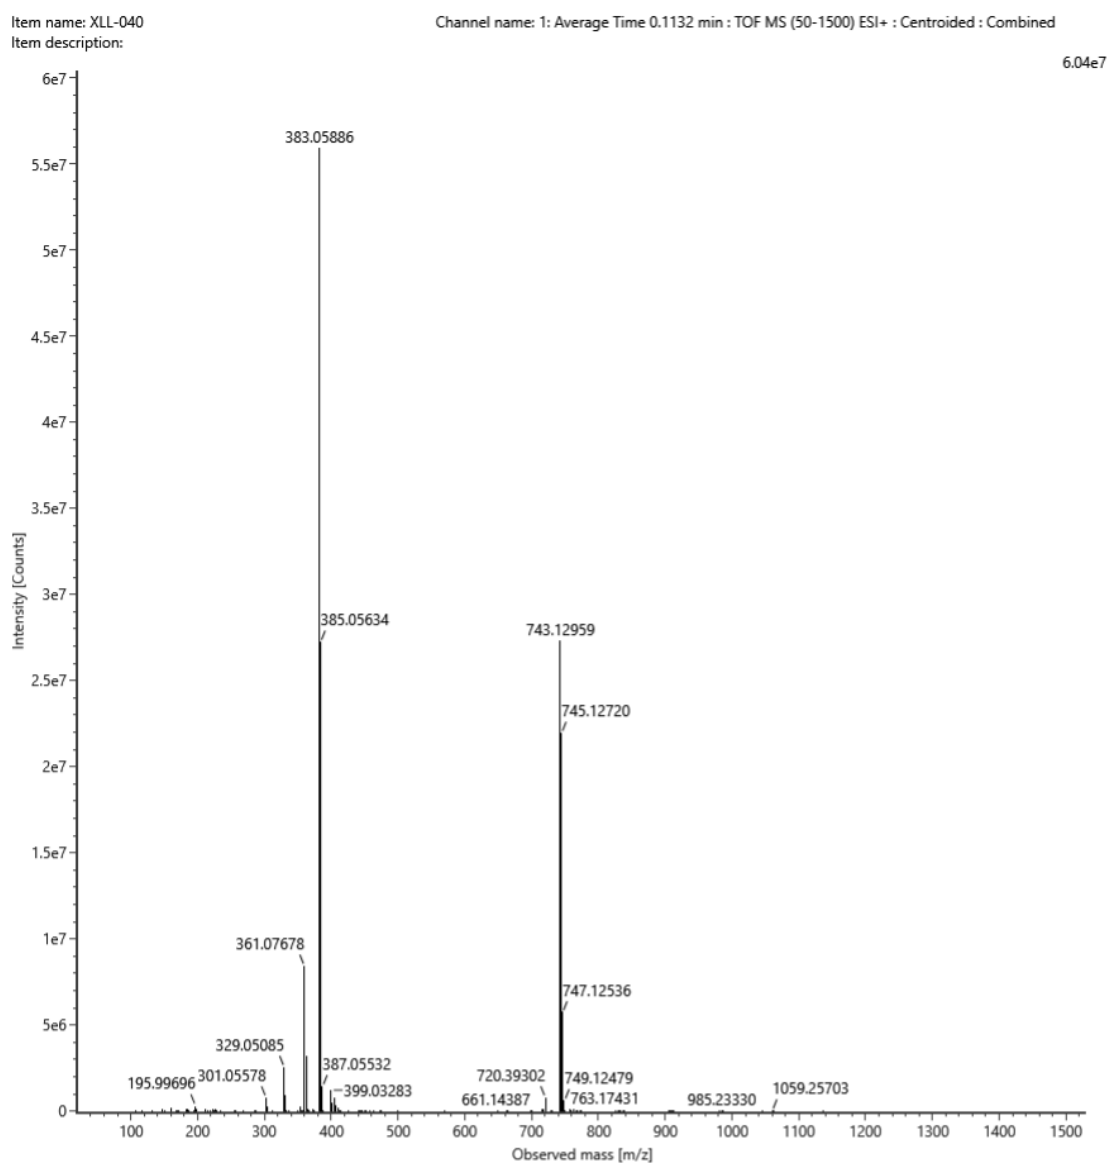

HRMS of compound 4k

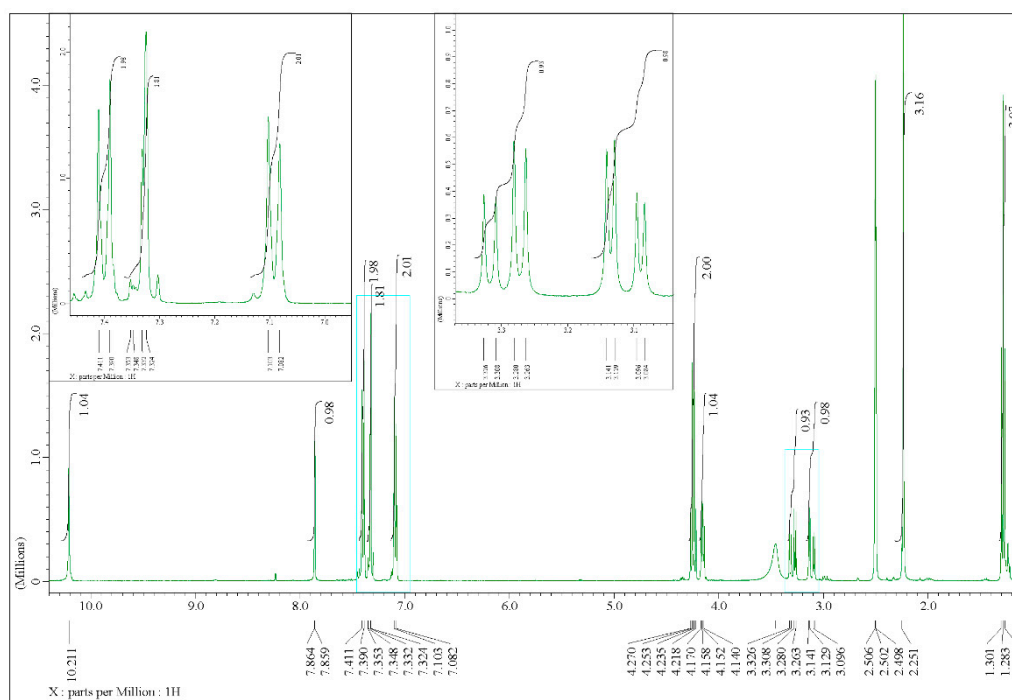<sup>1</sup>H NMR of compound 4l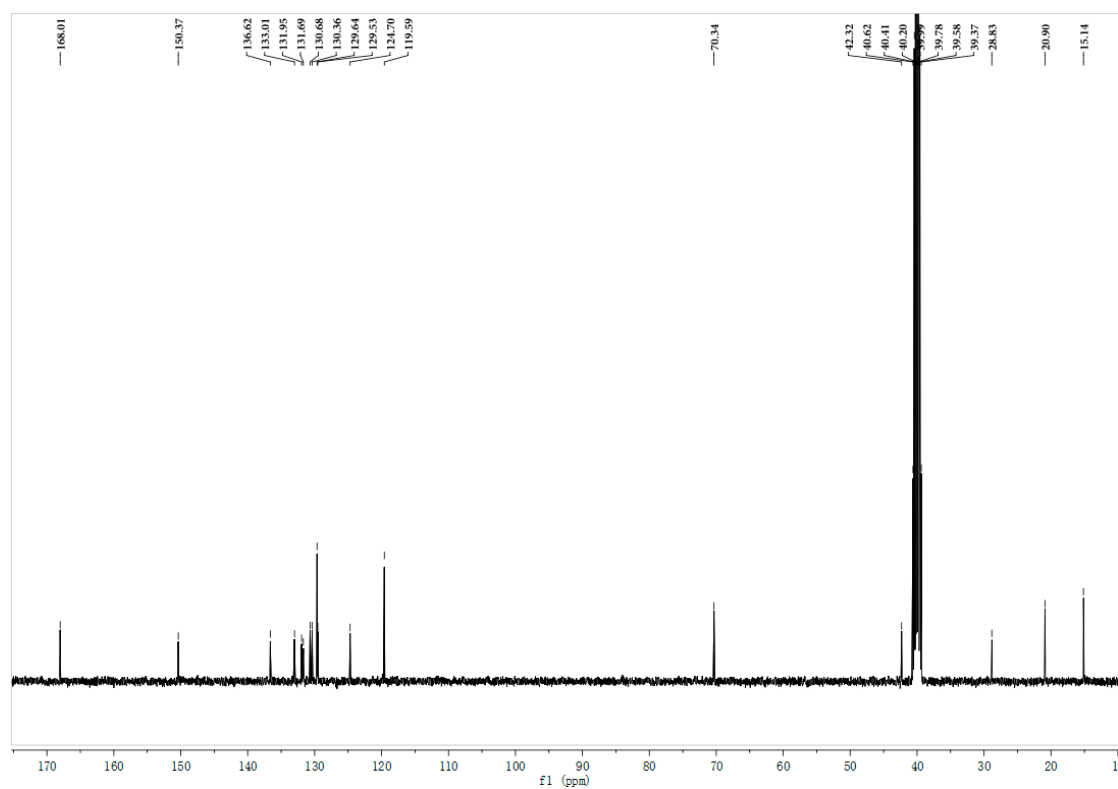<sup>13</sup>C NMR of compound 4l



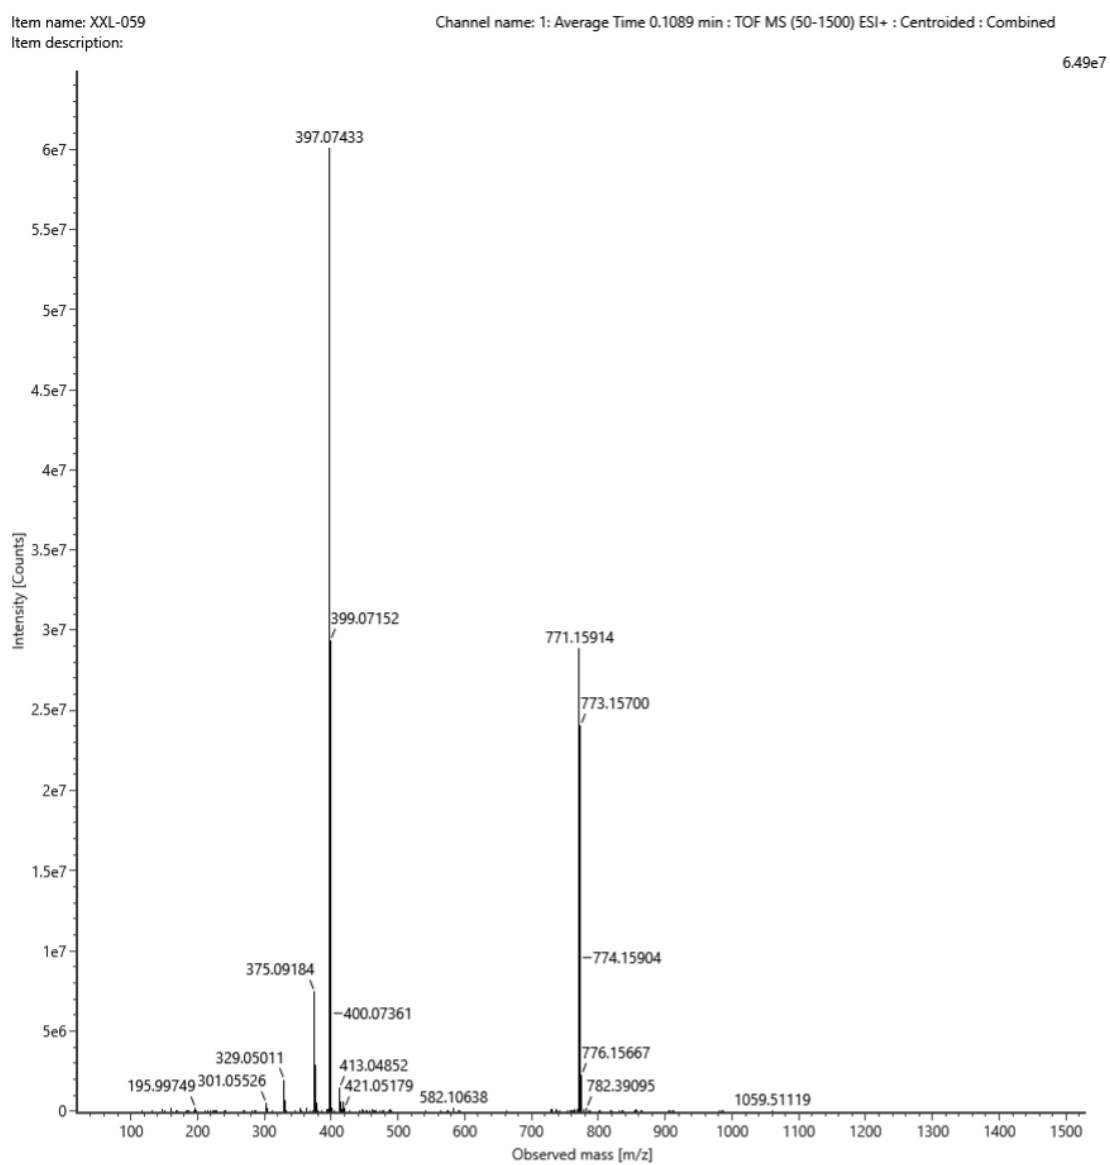

HRMS of compound 4l

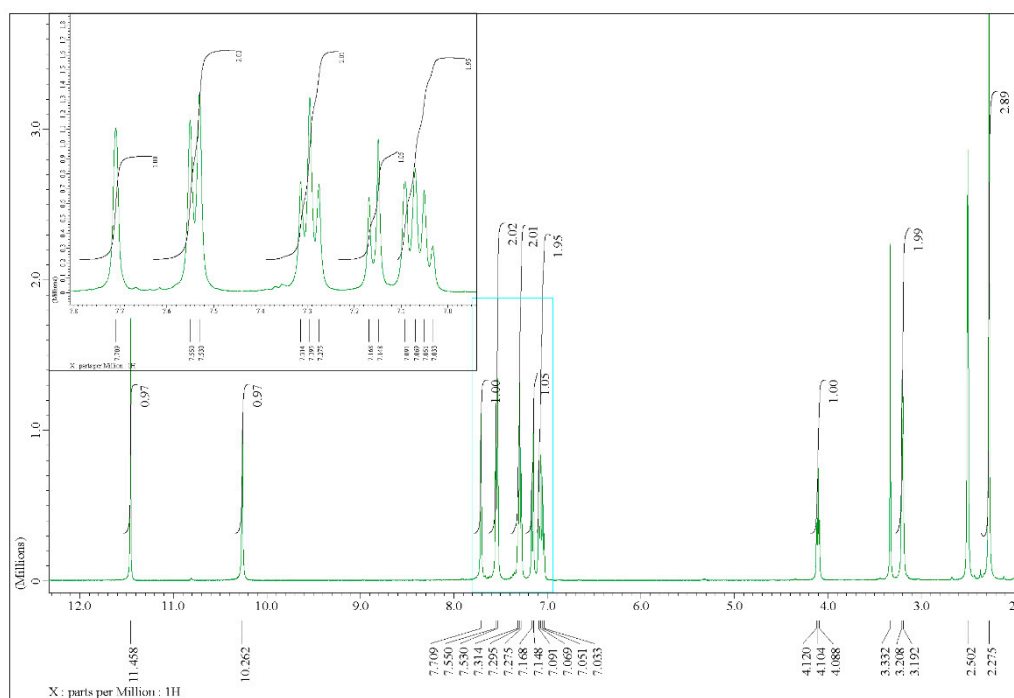<sup>1</sup>H NMR of compound 4m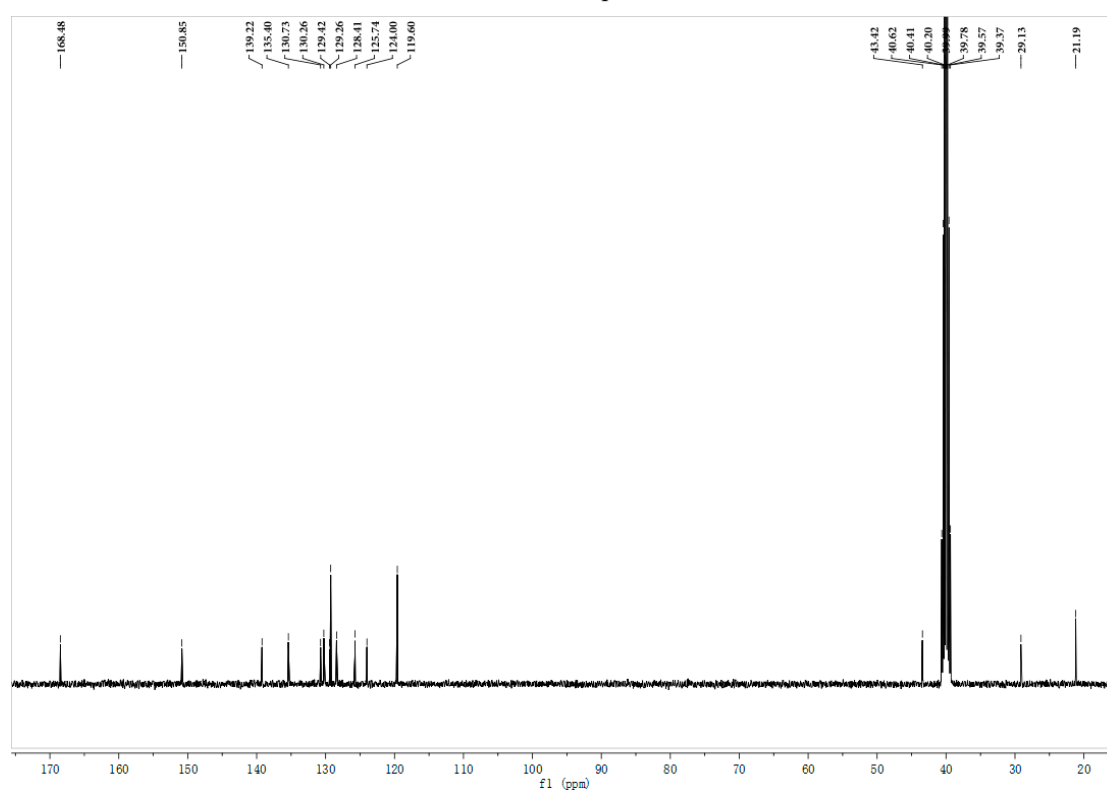<sup>13</sup>C NMR of compound 4m

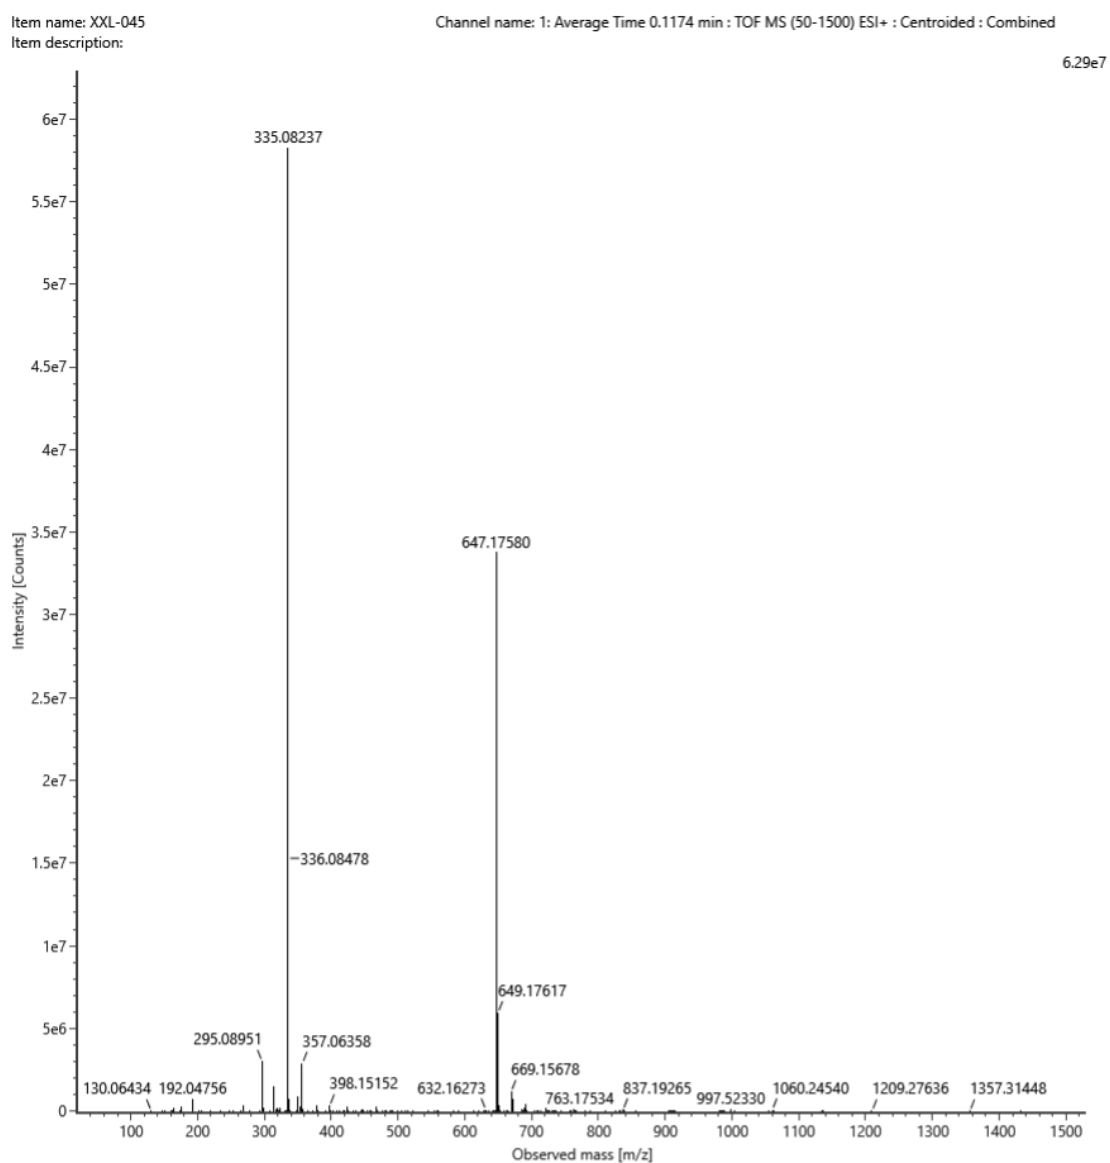

HRMS of compound 4m

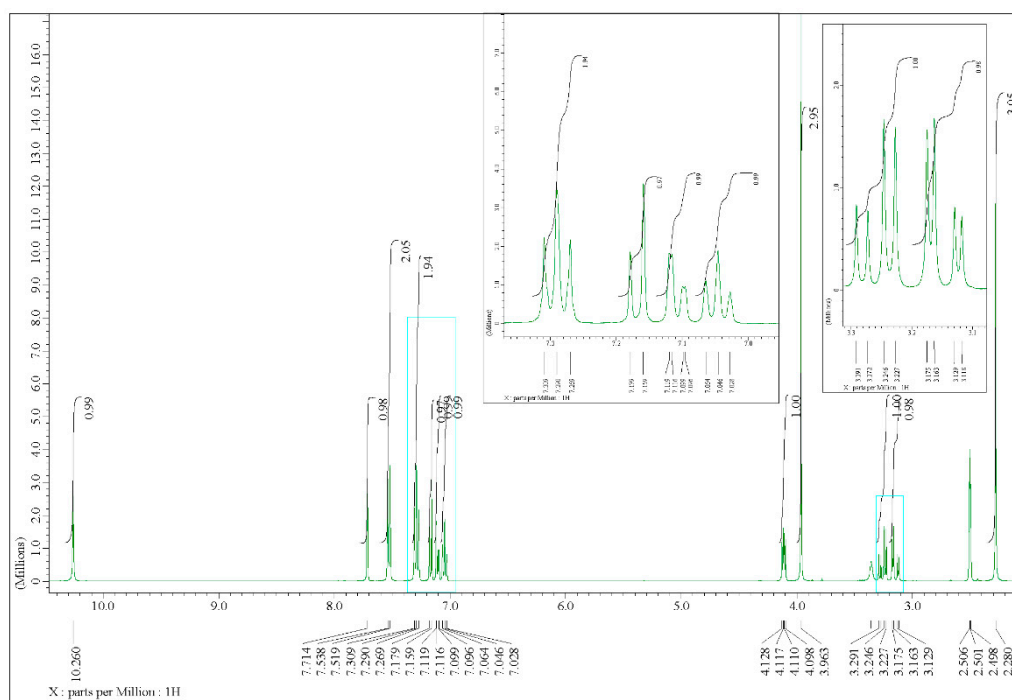<sup>1</sup>H NMR of compound 4n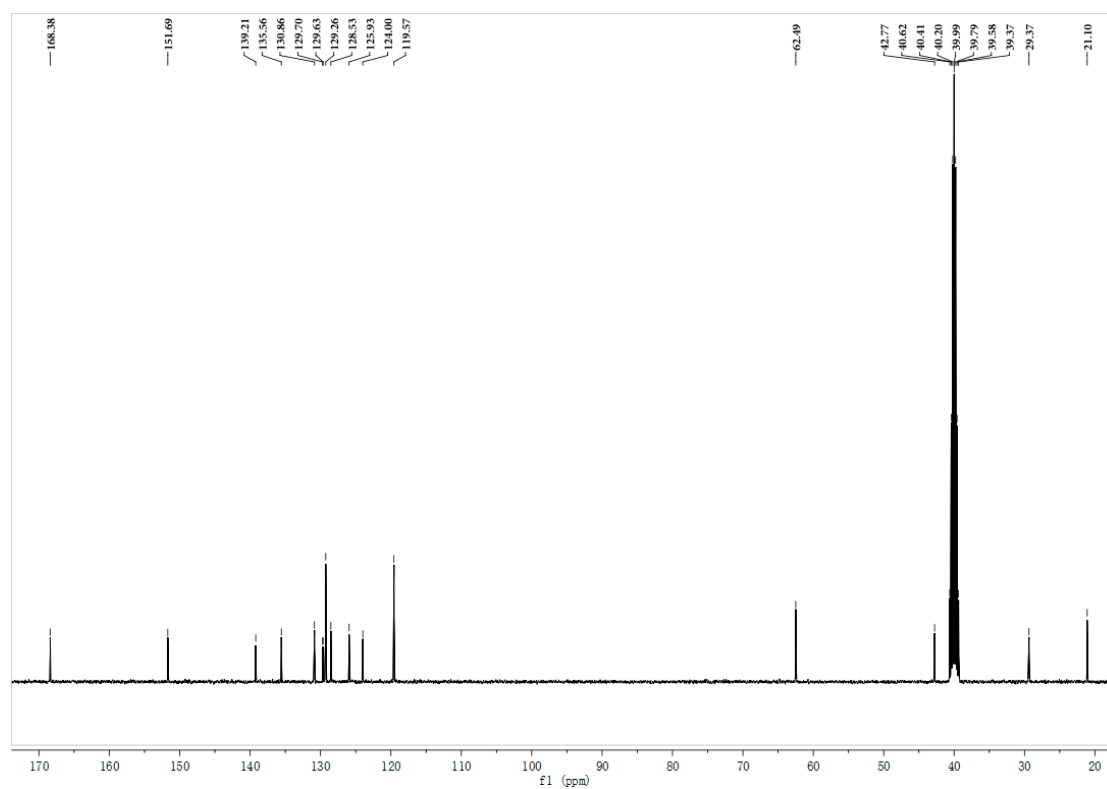<sup>13</sup>C NMR of compound 4n

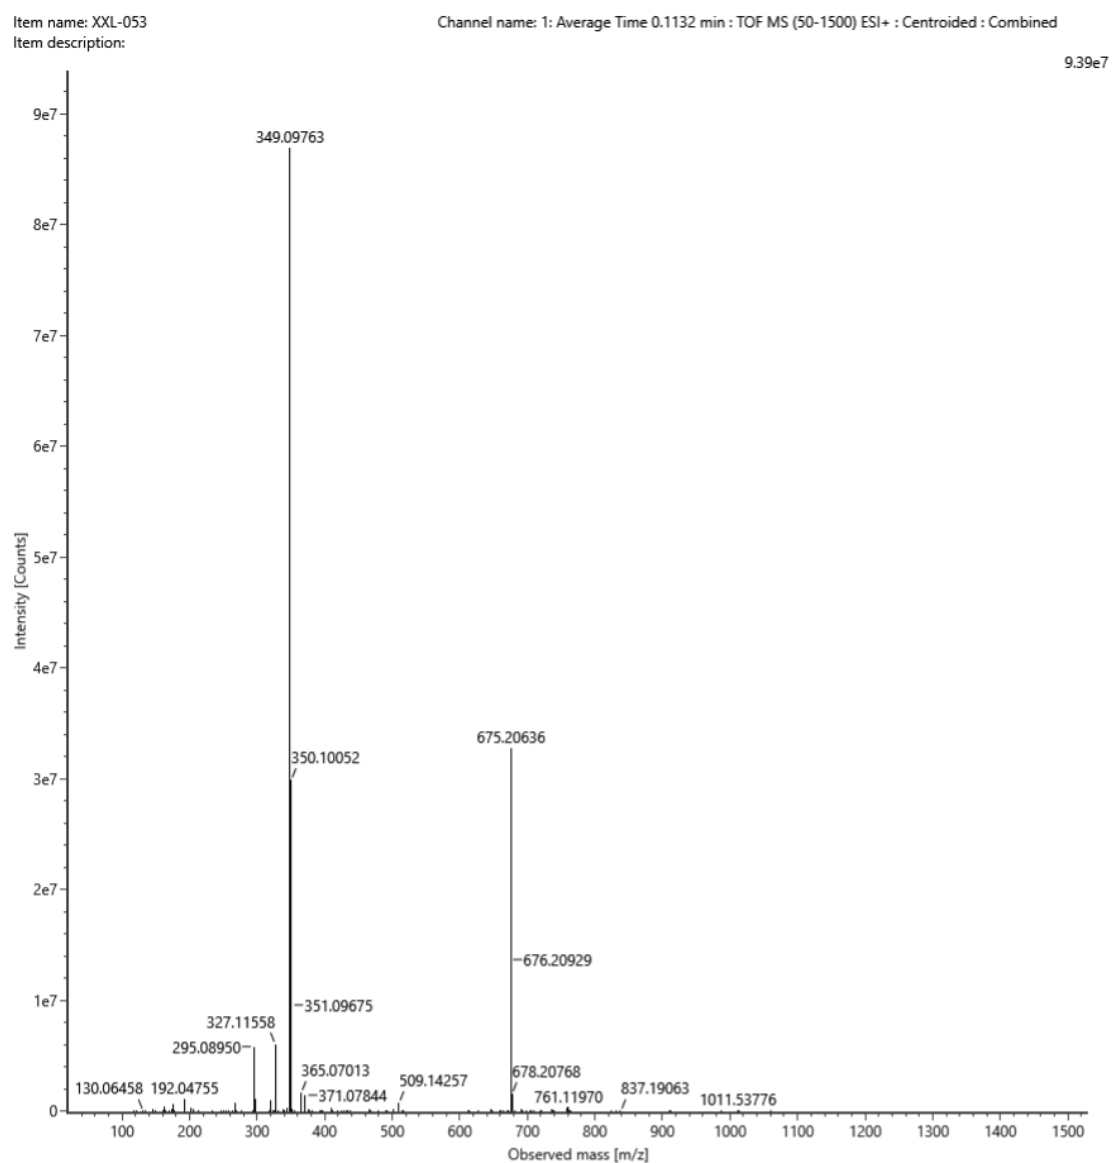

HRMS of compound 4n

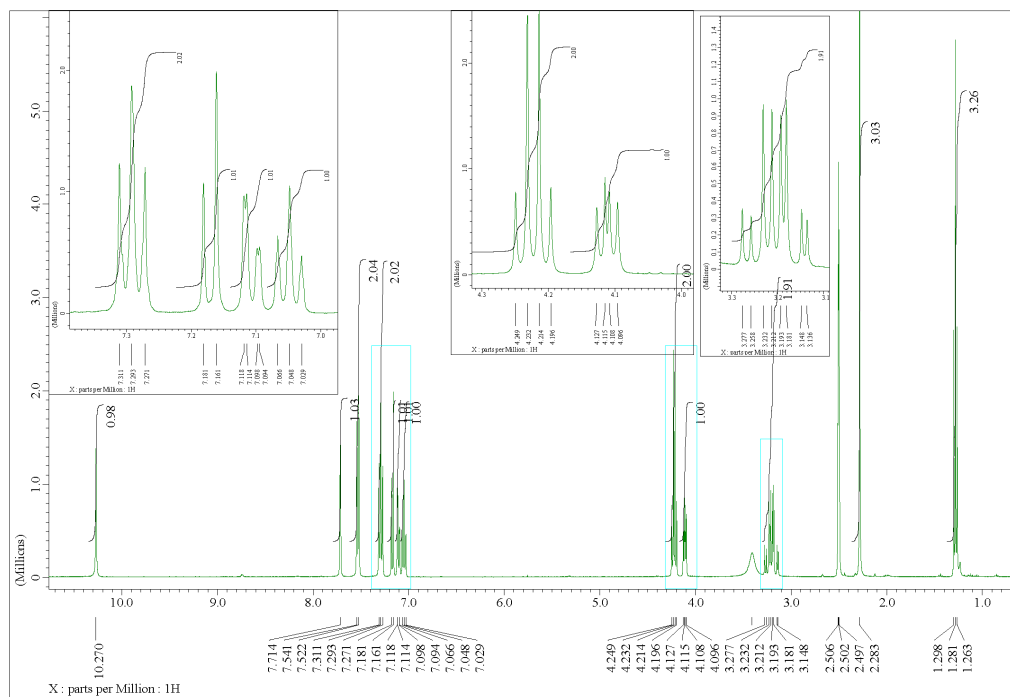<sup>1</sup>H NMR of compound 4o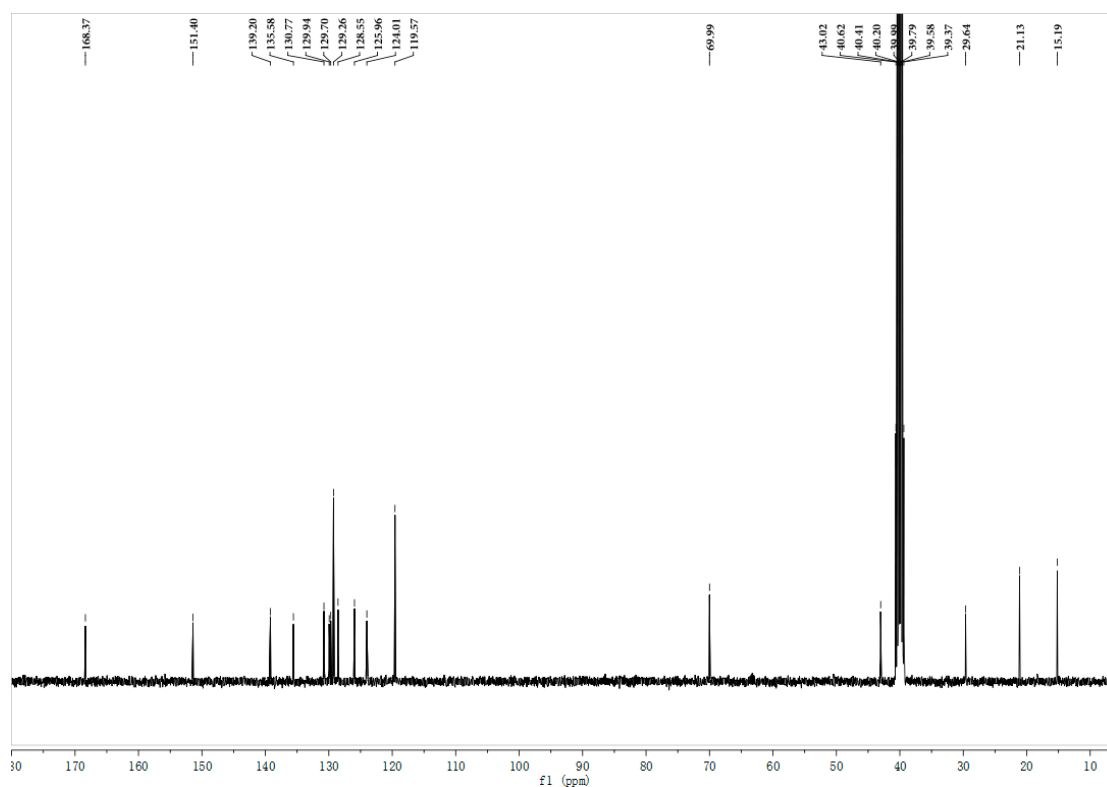<sup>13</sup>C NMR of compound 4o

Item name: XXL-052  
Item description:

Channel name: 1: Average Time 0.1175 min : TOF MS (50-1500) ESI+ : Centroided : Combined

8.88e7

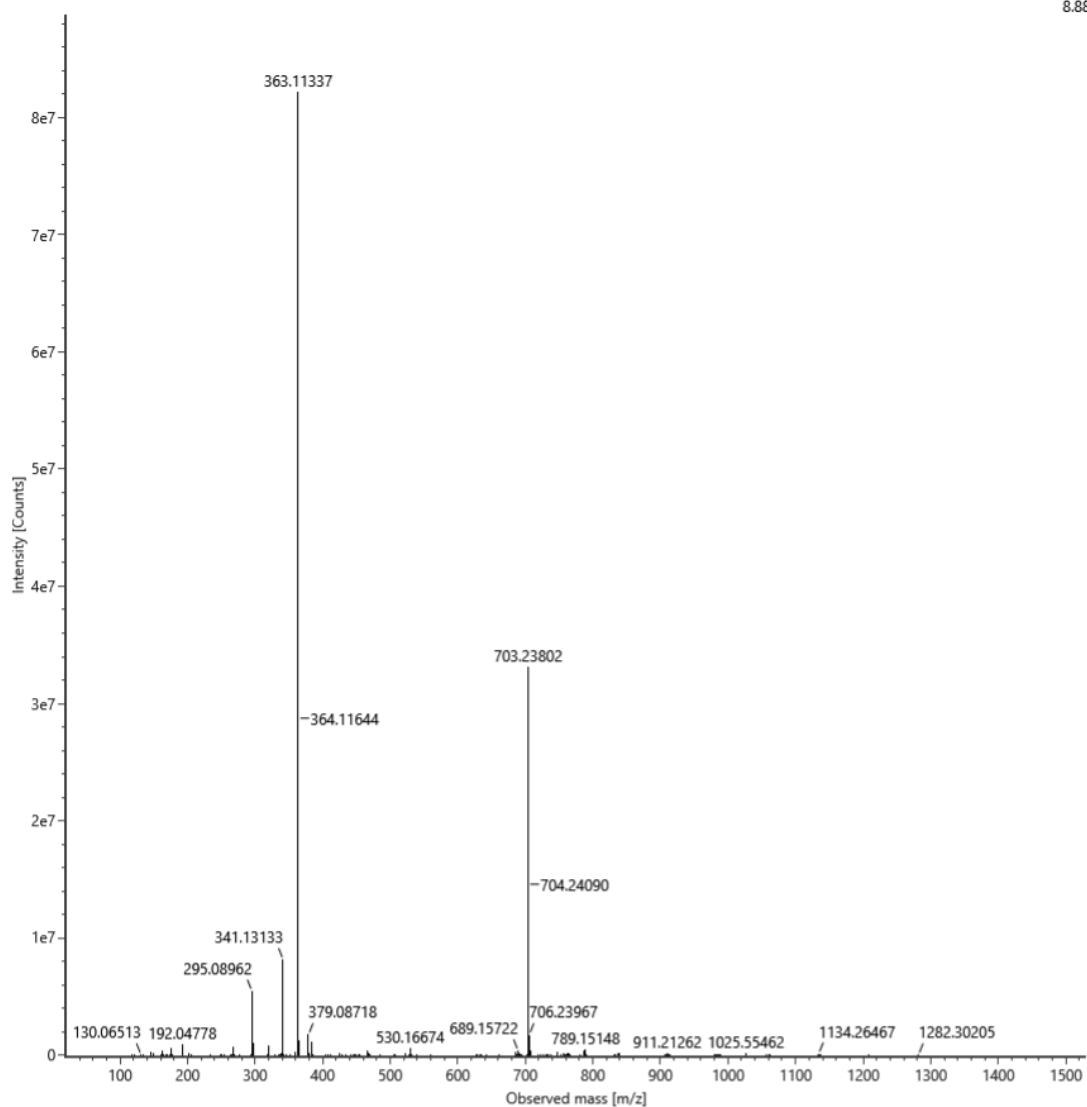

HRMS of compound 4o

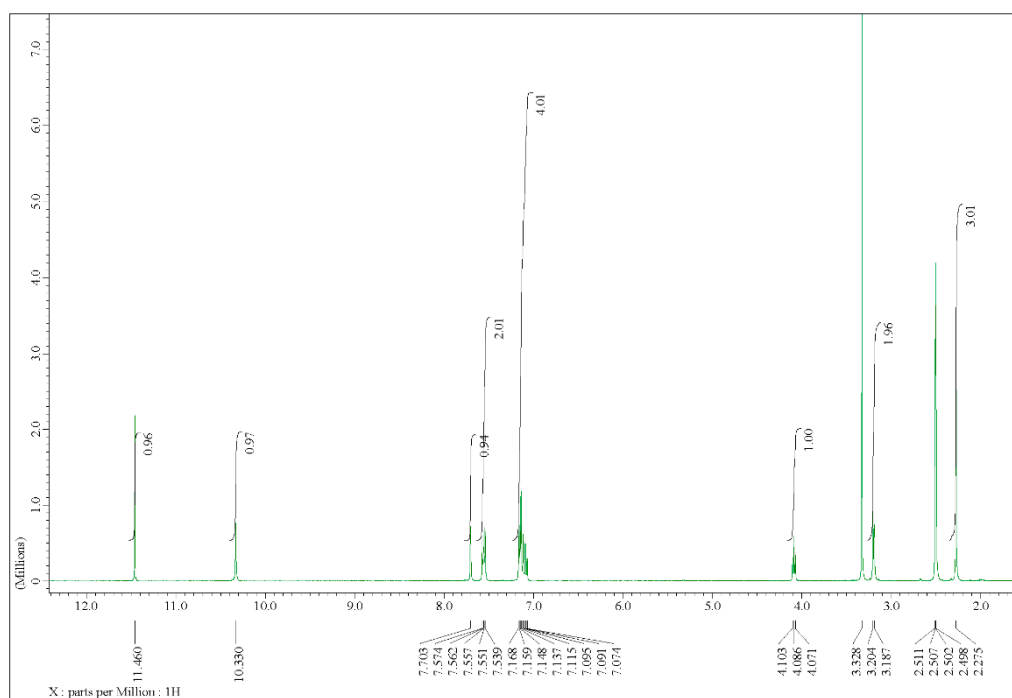<sup>1</sup>H NMR of compound 4p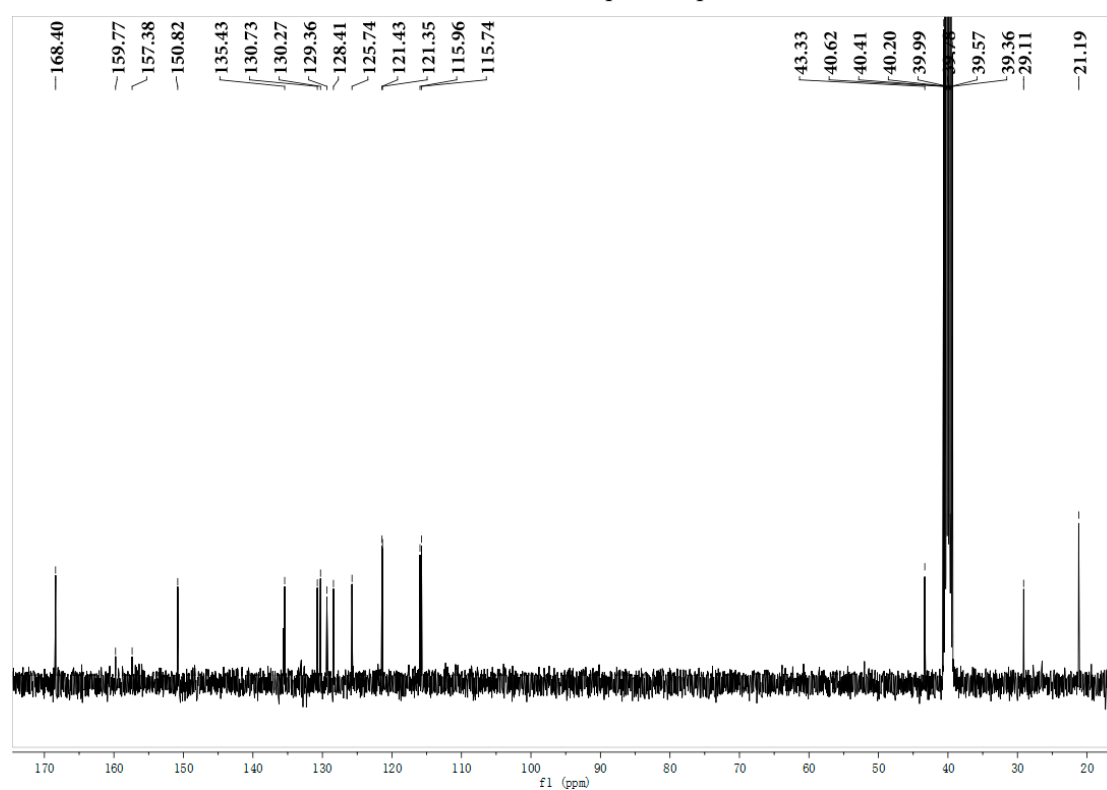<sup>13</sup>C NMR of compound 4p



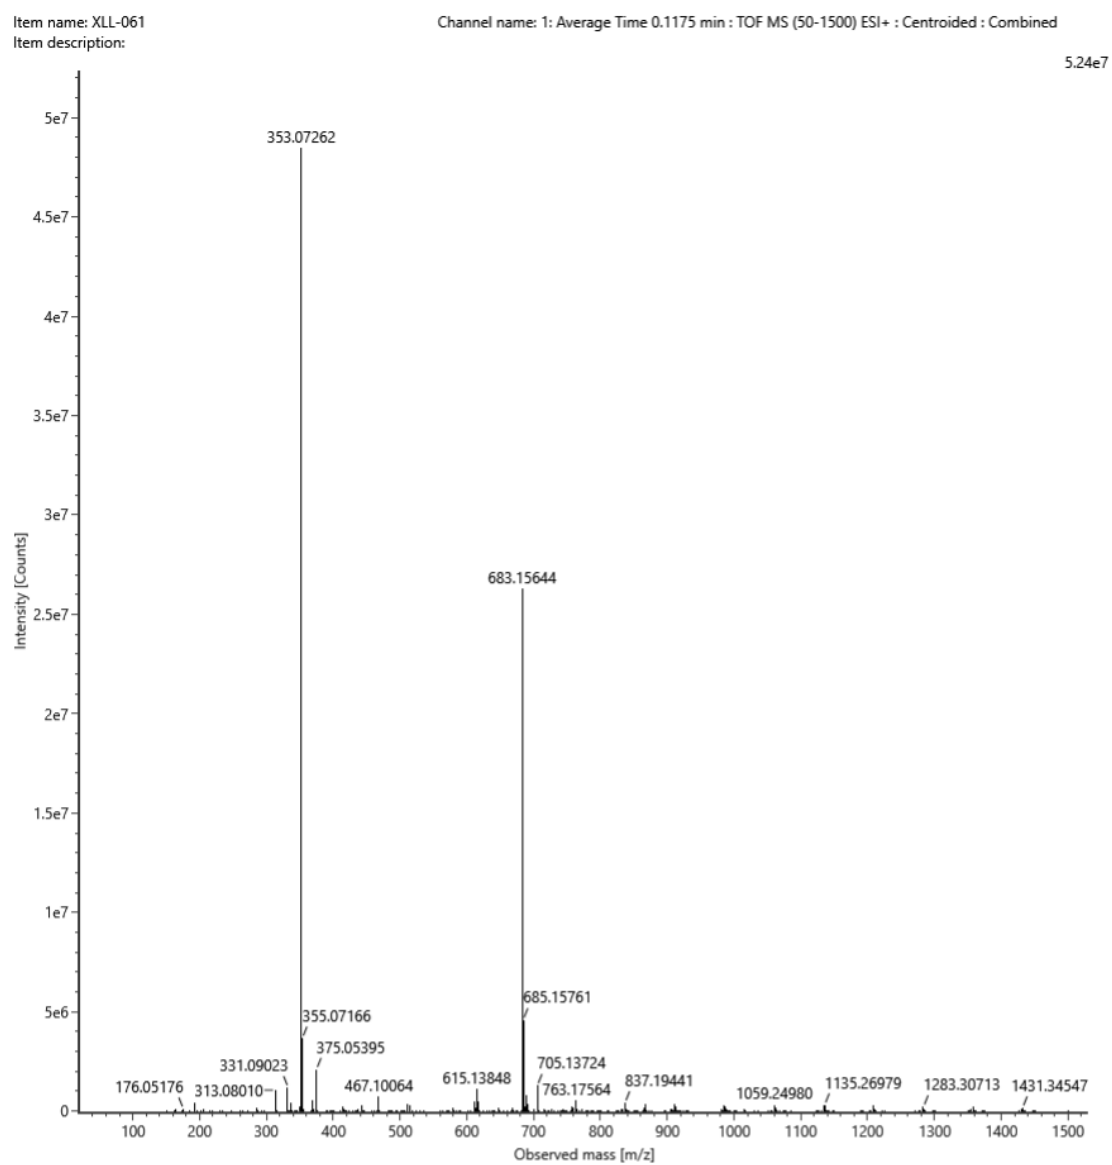

HRMS of compound 4p

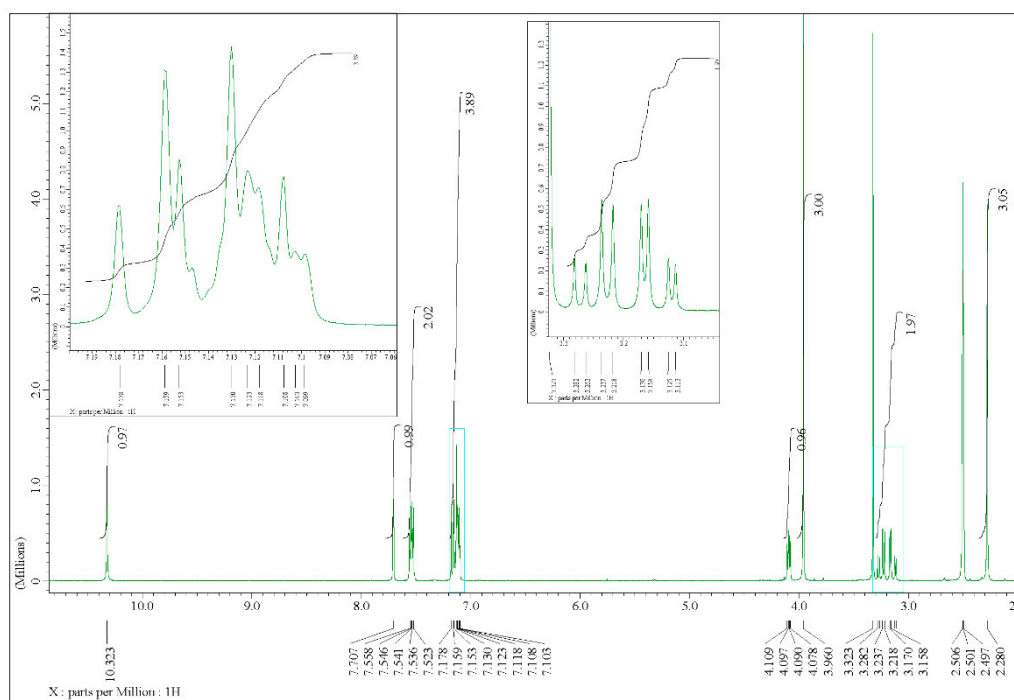 $^1\text{H}$  NMR of compound 4q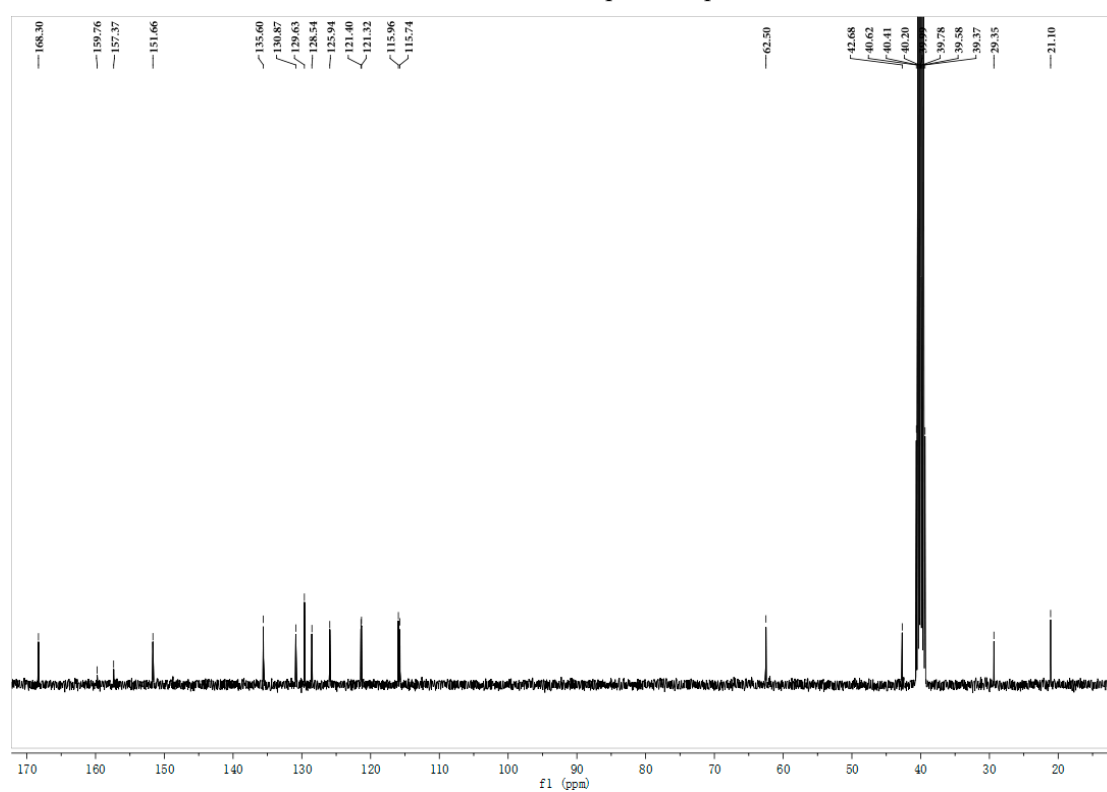 $^{13}\text{C}$  NMR of compound 4q

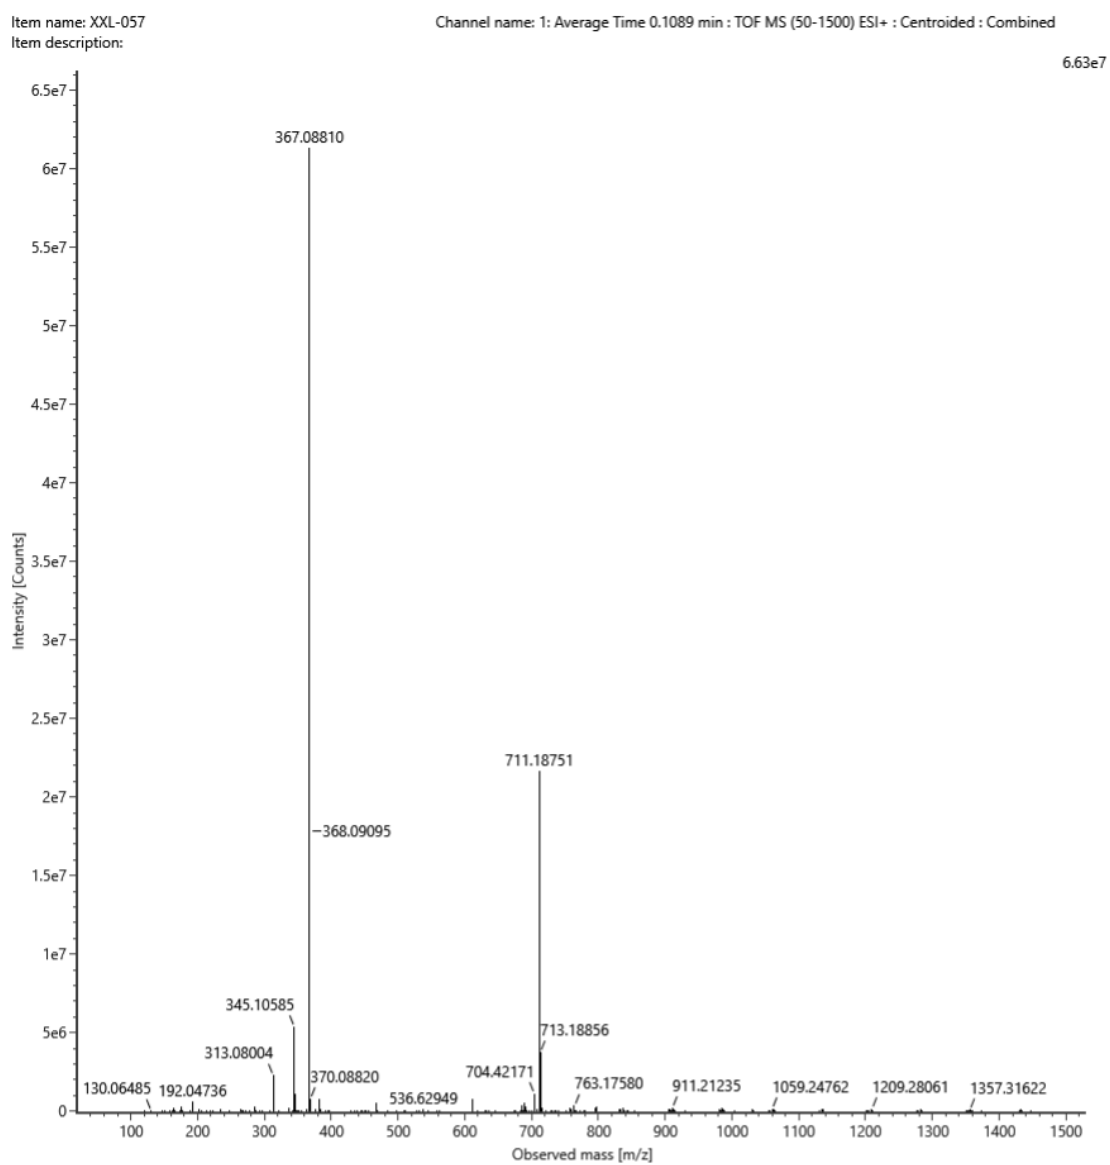

HRMS of compound 4q

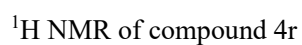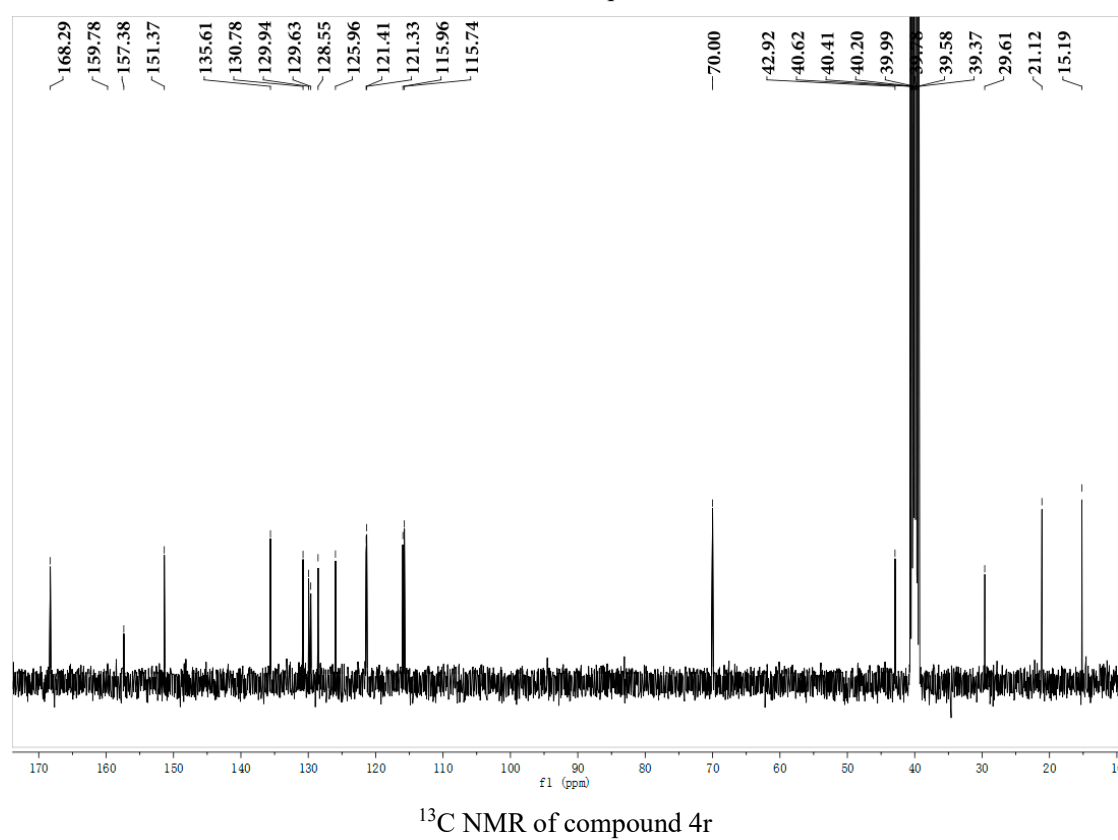

Item name: XXL-060  
Item description:

Channel name: 1: Average Time 0.1046 min : TOF MS (50-1500) ESI+ : Centroided : Combined

7.91e7

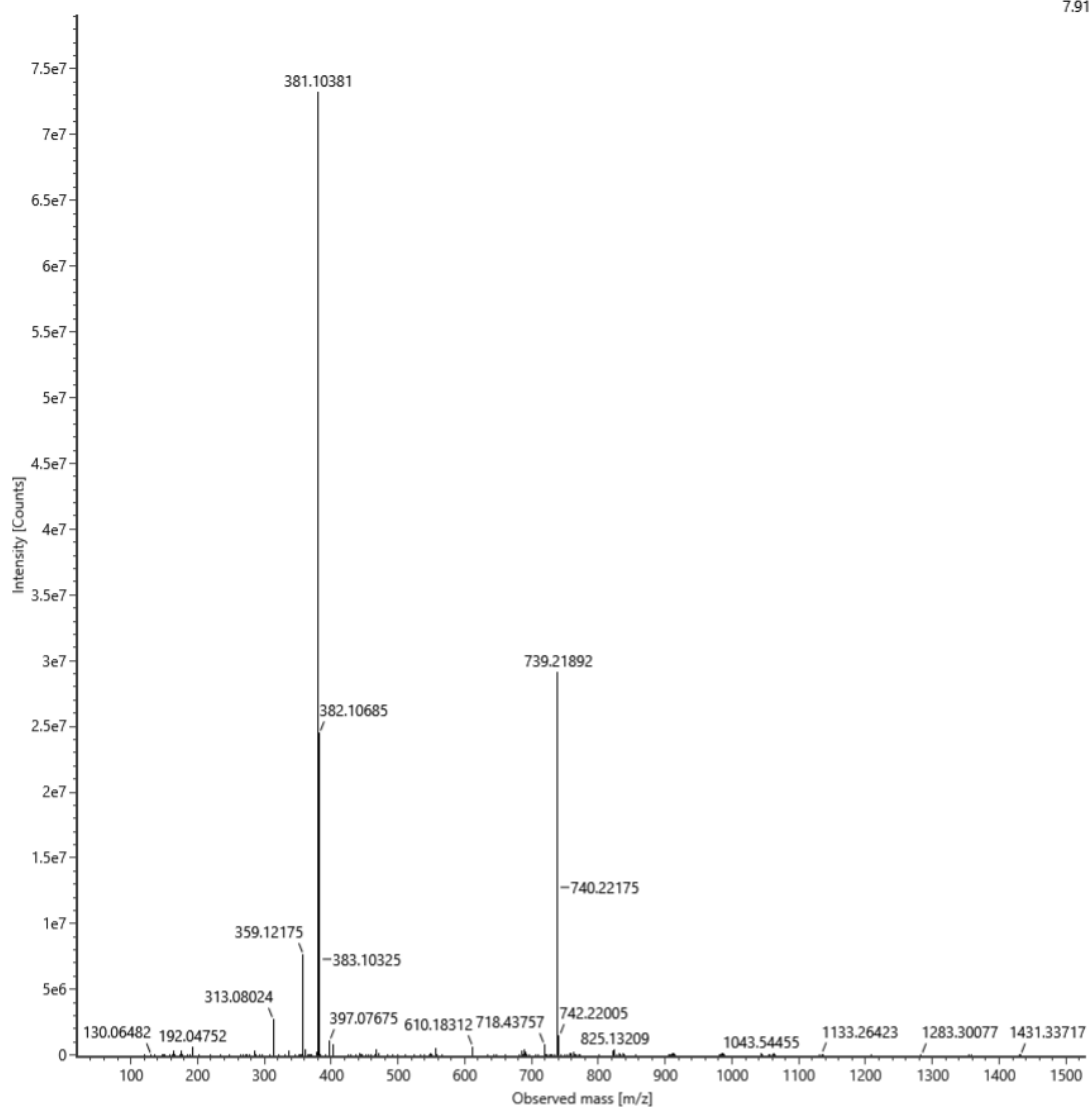

HRMS of compound 4r

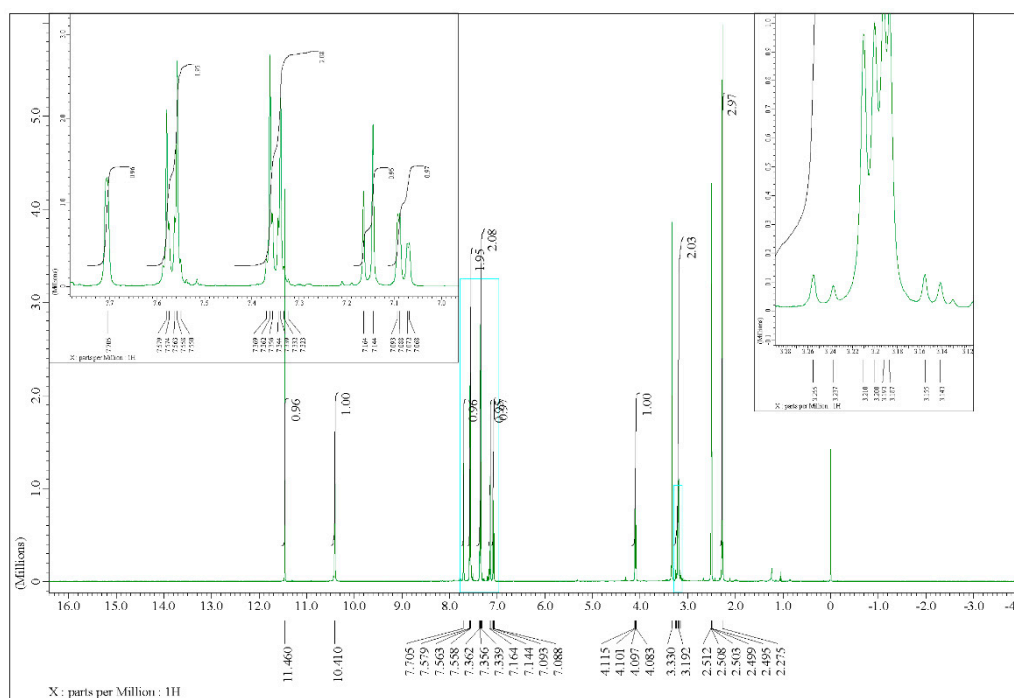<sup>1</sup>H NMR of compound 4s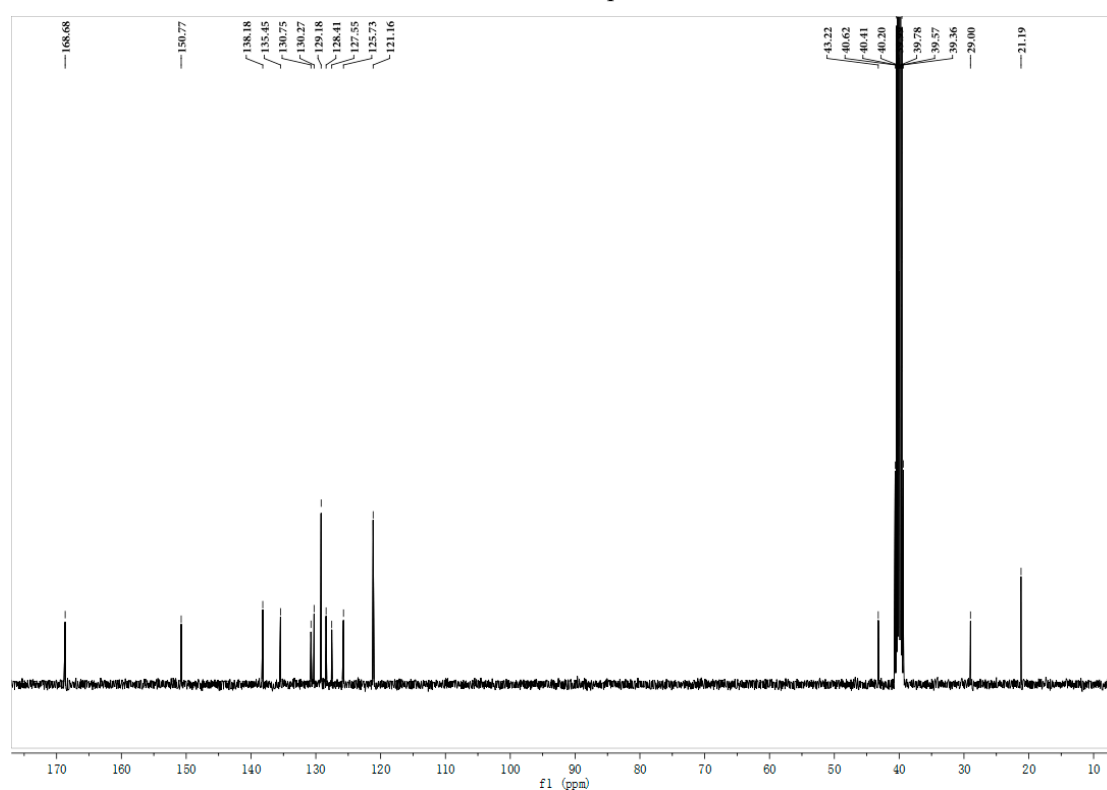<sup>13</sup>C NMR of compound 4s

Item name: XXL-050  
Item description:

Channel name: 1: Average Time 0.1046 min : TOF MS (50-1500) ESI+ : Centroided : Combined

3.46e7

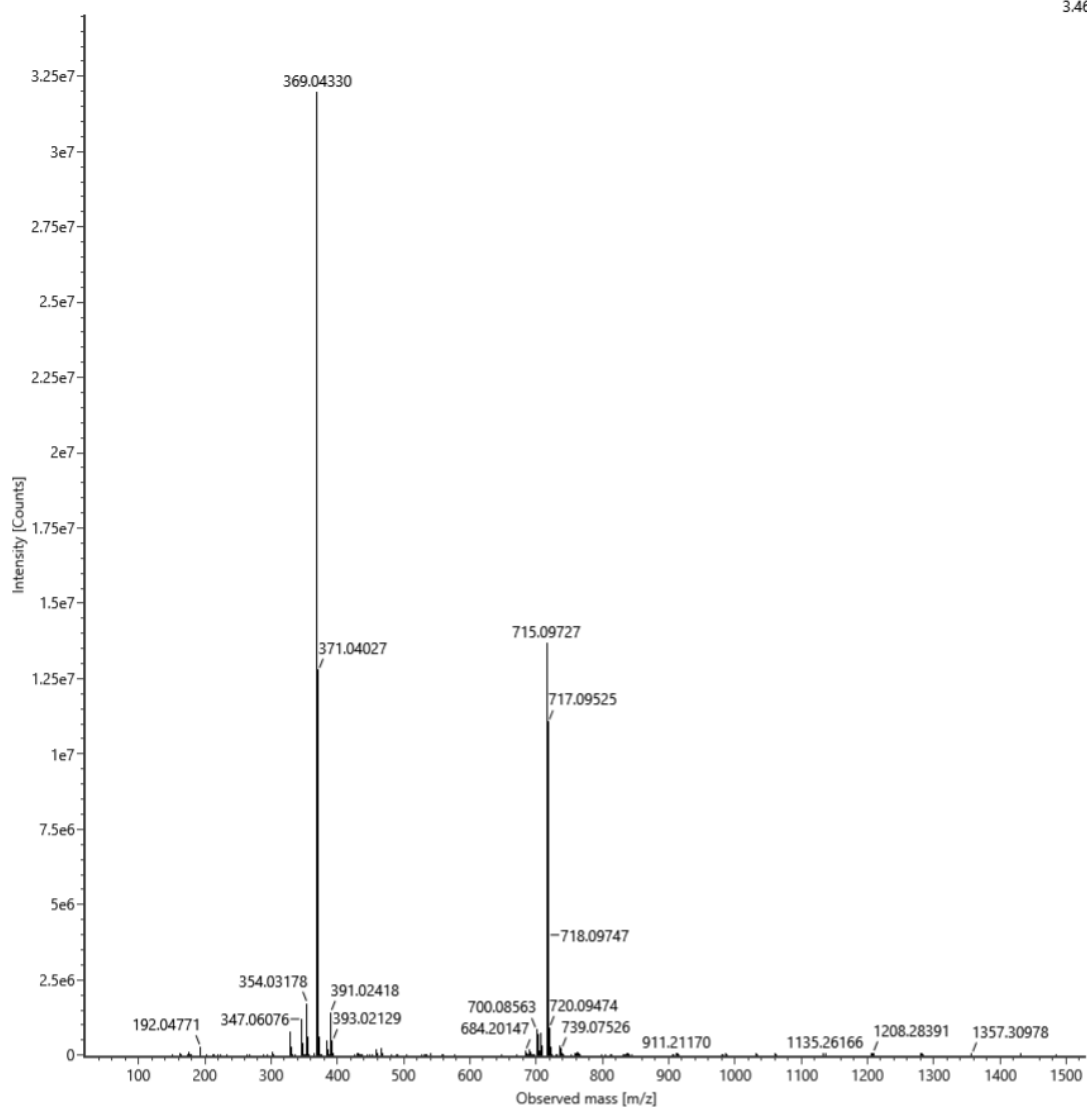

HRMS of compound 4s

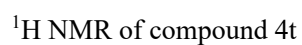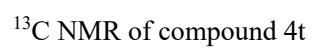



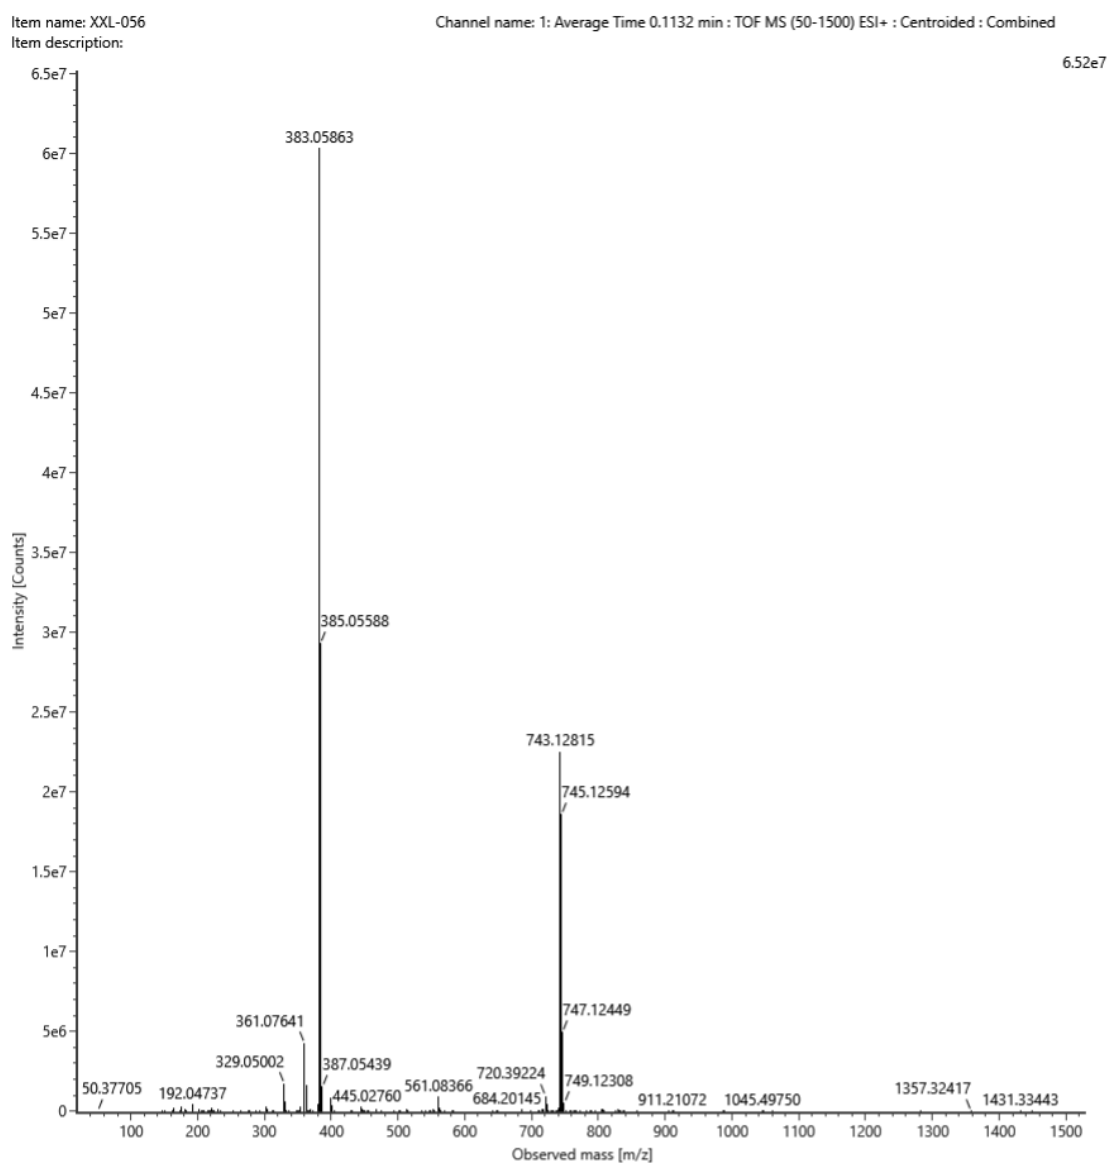

HRMS of compound 4t

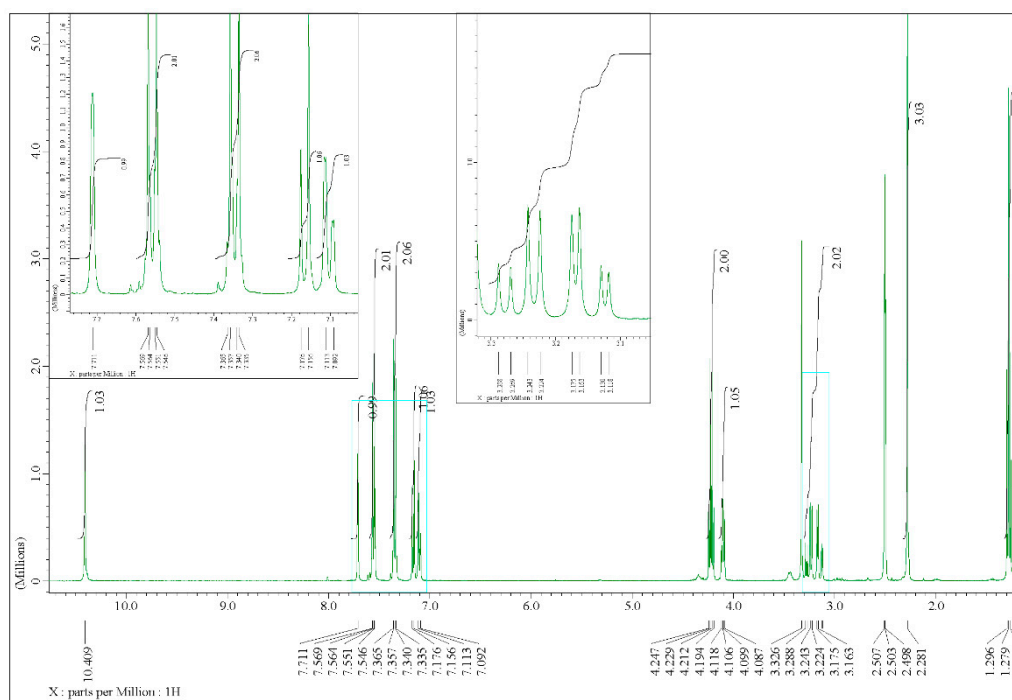<sup>1</sup>H NMR of compound 4u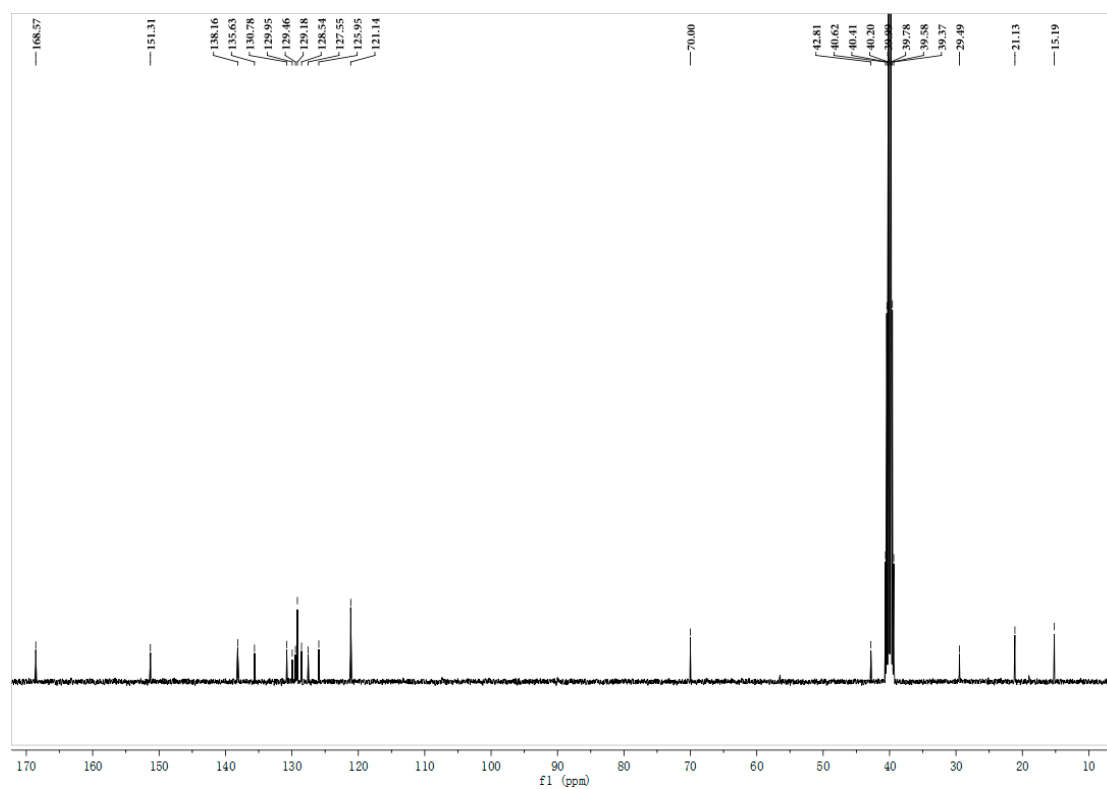<sup>13</sup>C NMR of compound 4u

Item name: XXL-054  
Item description:

Channel name: 1: Average Time 0.1217 min : TOF MS (50-1500) ESI+ : Centroided : Combined

8.67e7

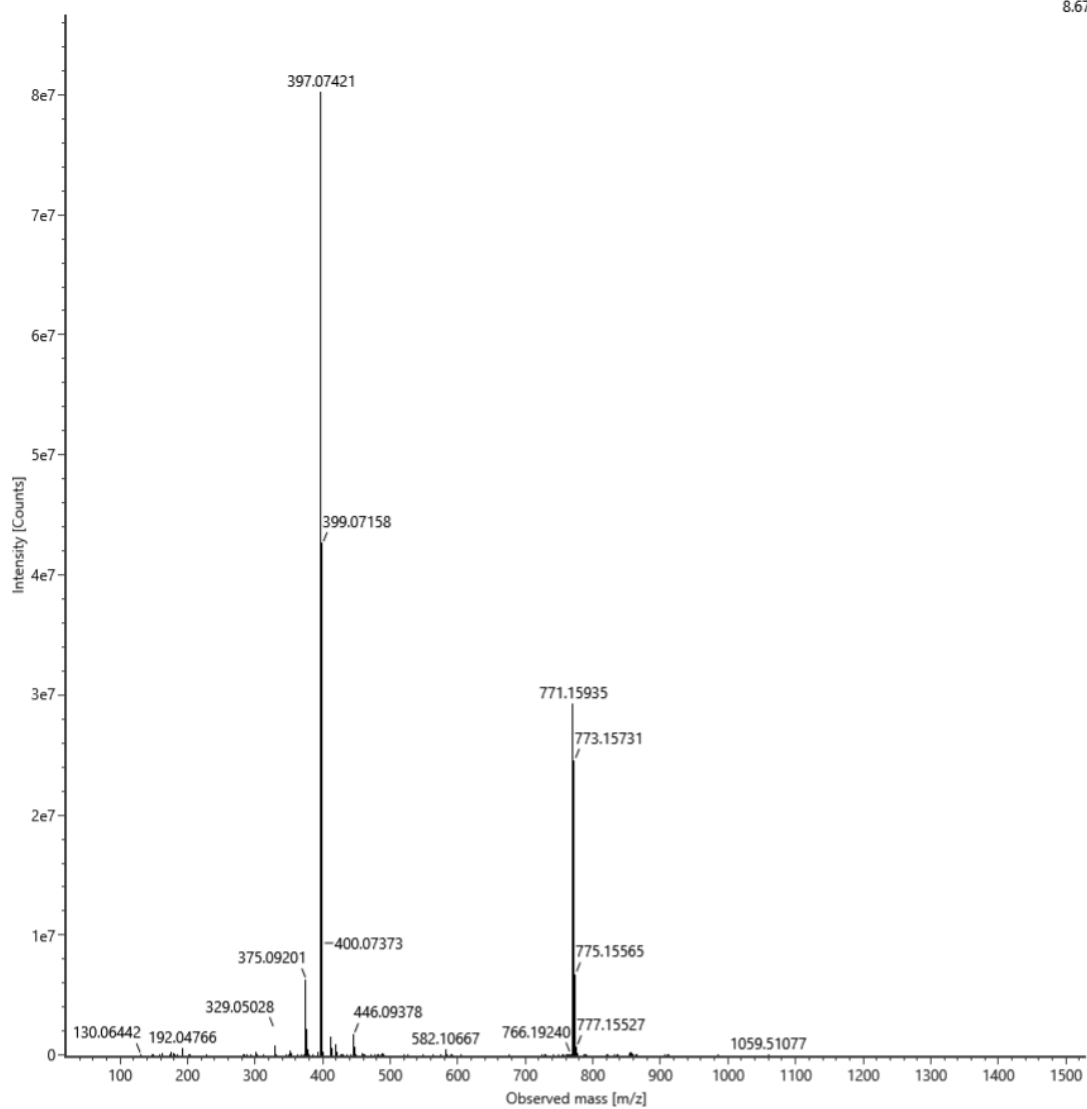

HRMS of compound 4u

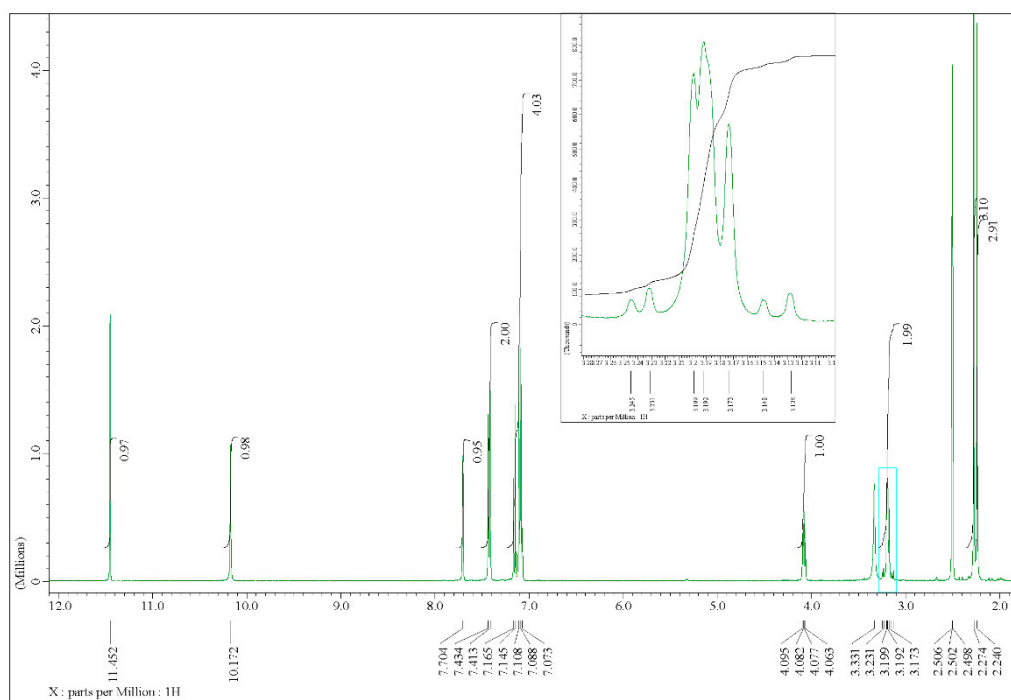 $^1\text{H}$  NMR of compound 4v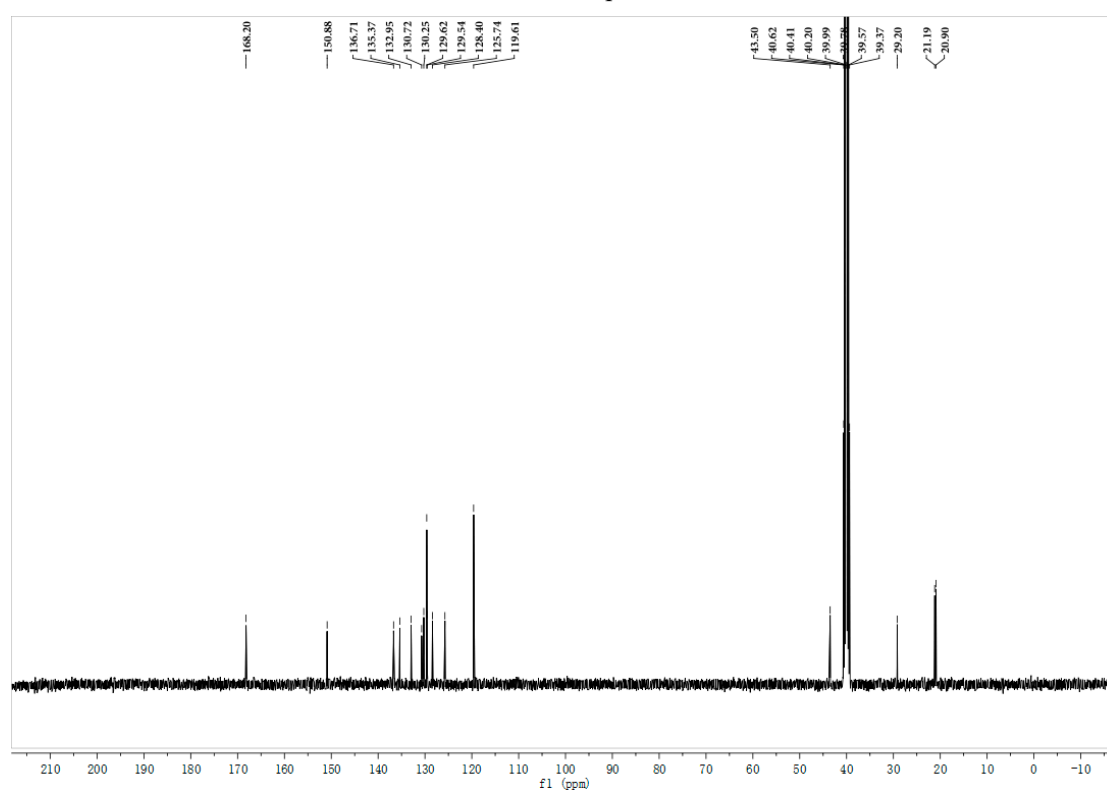 $^{13}\text{C}$  NMR of compound 4v

Item name: XXL-046  
Item description:

Channel name: 1: Average Time 0.1175 min : TOF MS (50-1500) ESI+ : Centroided : Combined

9.56e7

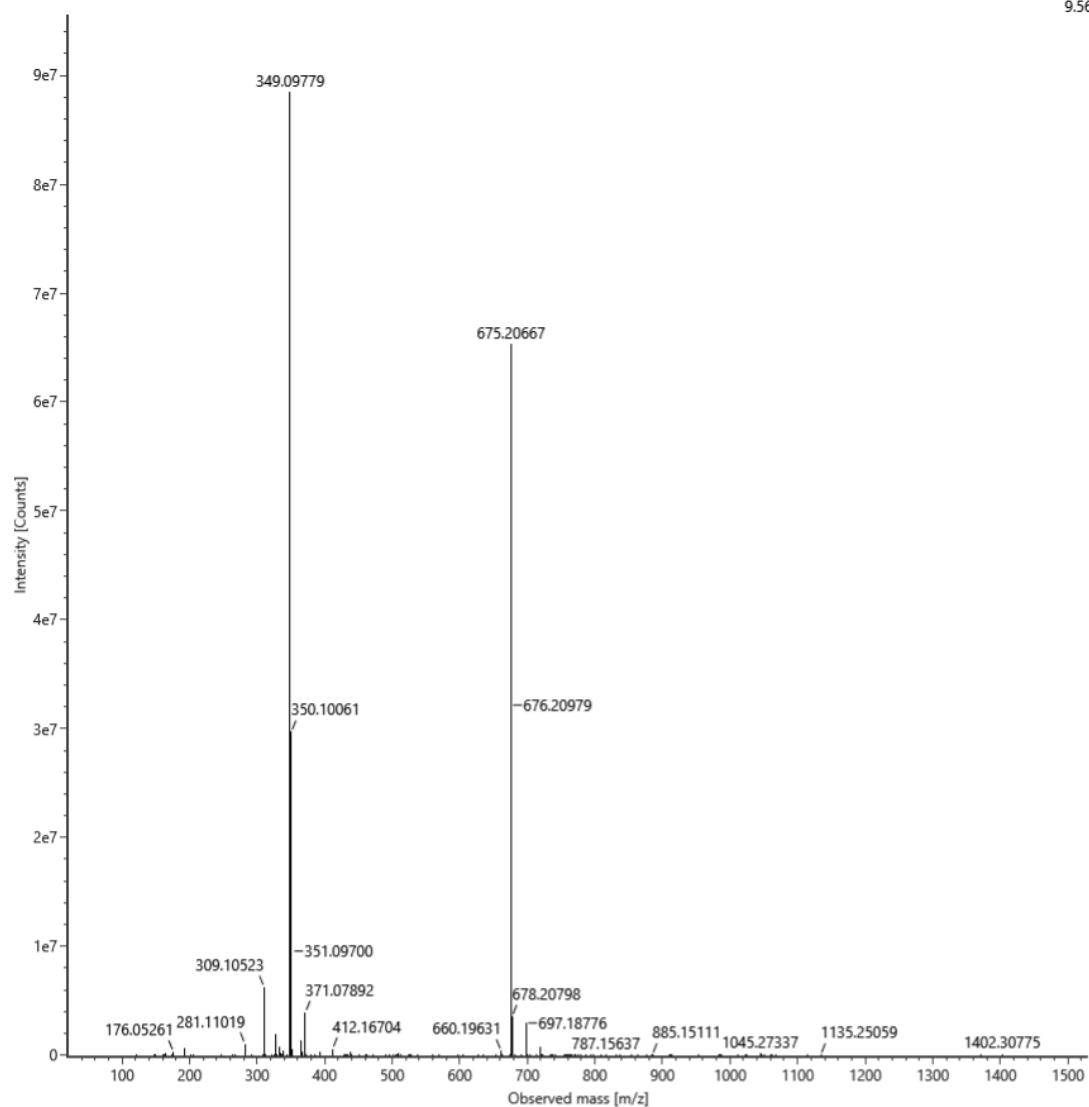

HRMS of compound 4v

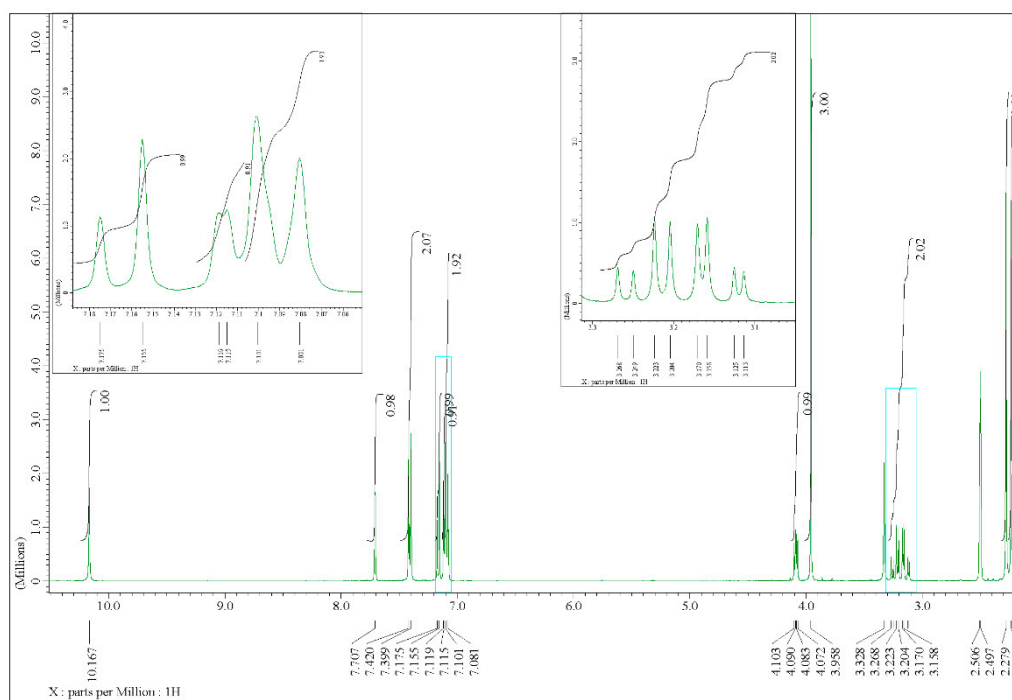<sup>1</sup>H NMR of compound 4w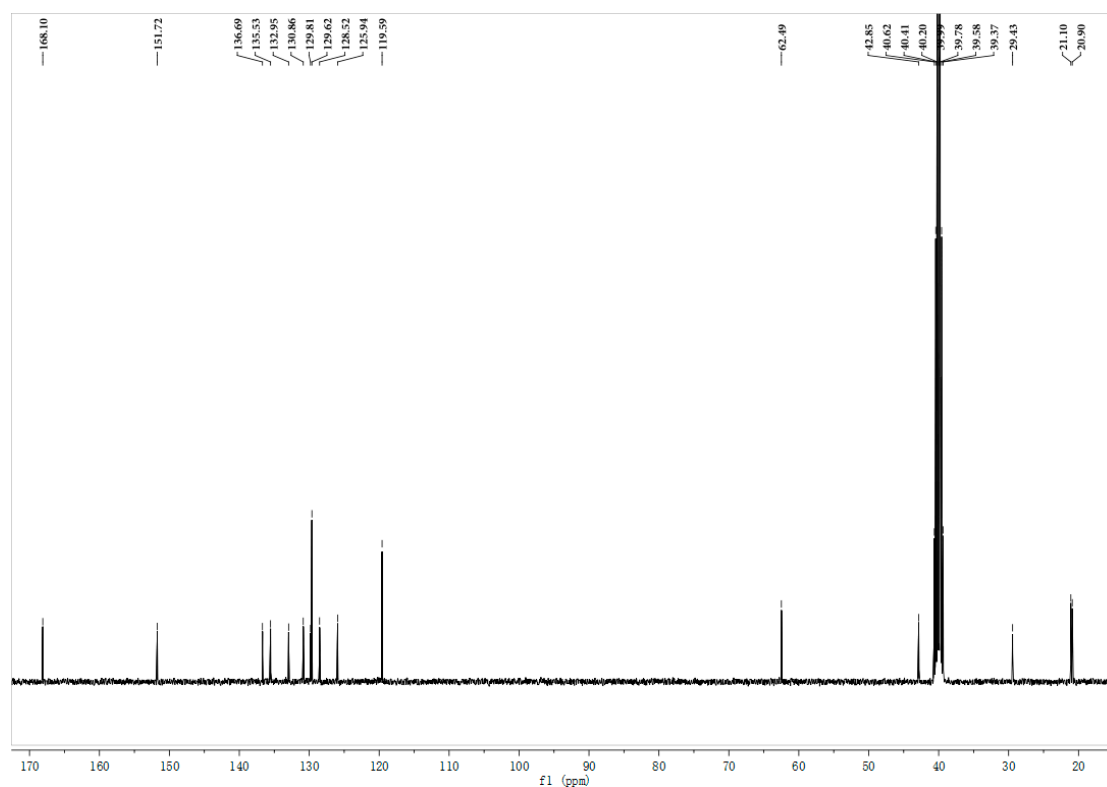<sup>13</sup>C NMR of compound 4w

Item name: XXL-058  
Item description:

Channel name: 1: Average Time 0.1175 min : TOF MS (50-1500) ESI+ : Centroided : Combined

8.19e7

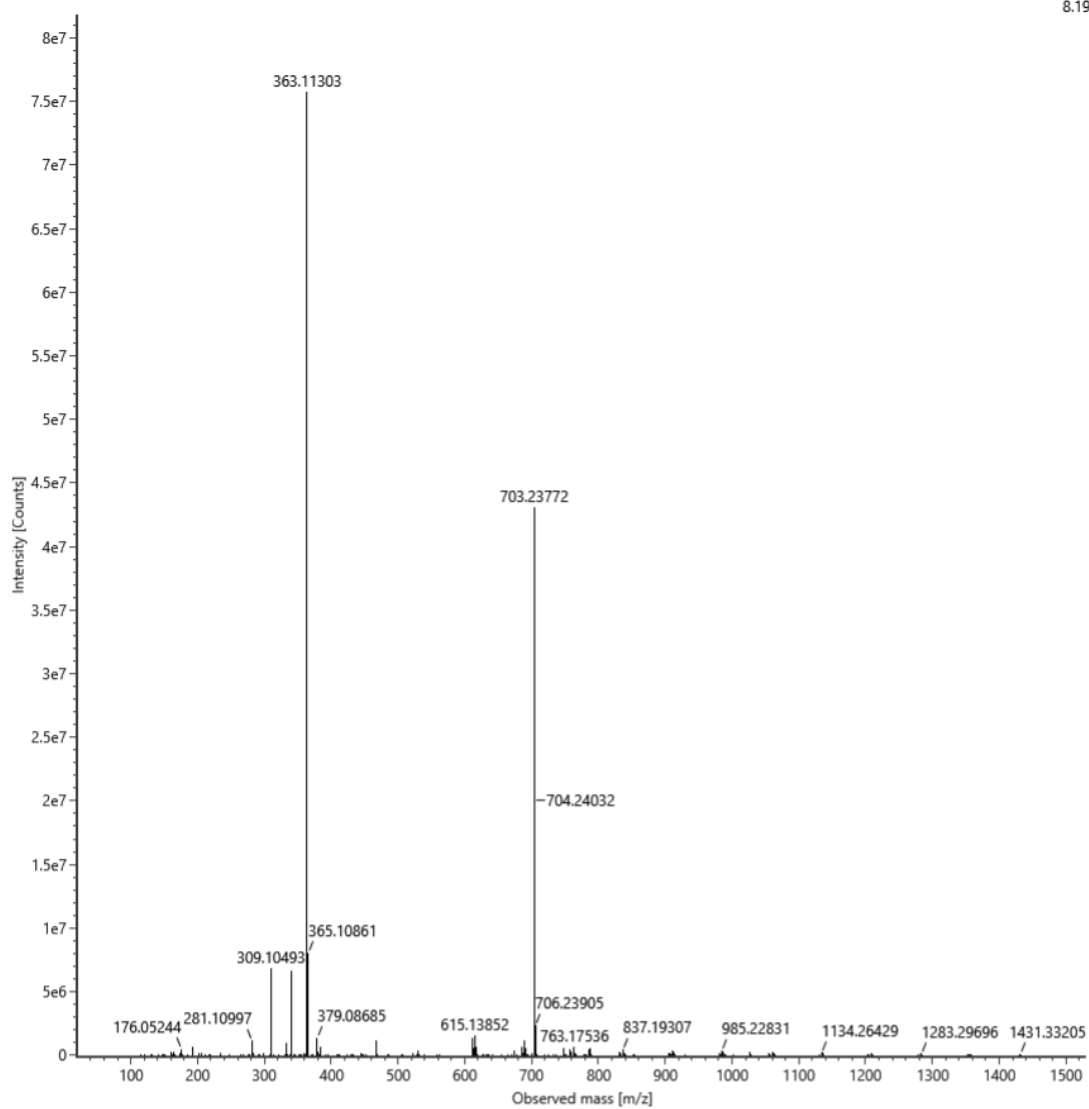

HRMS of compound 4w

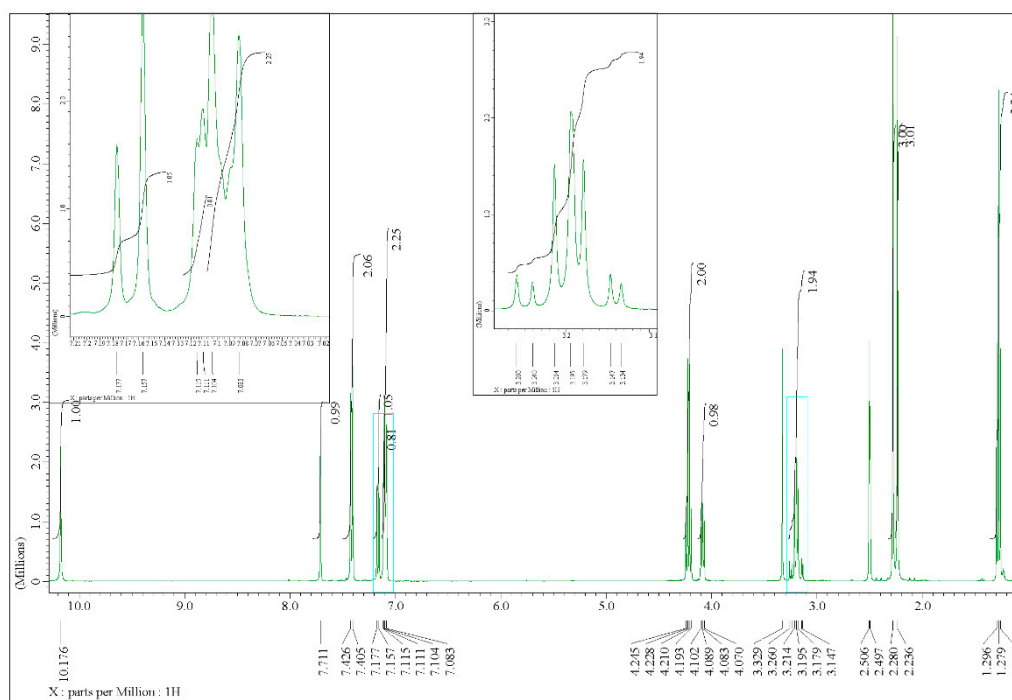<sup>1</sup>H NMR of compound 4x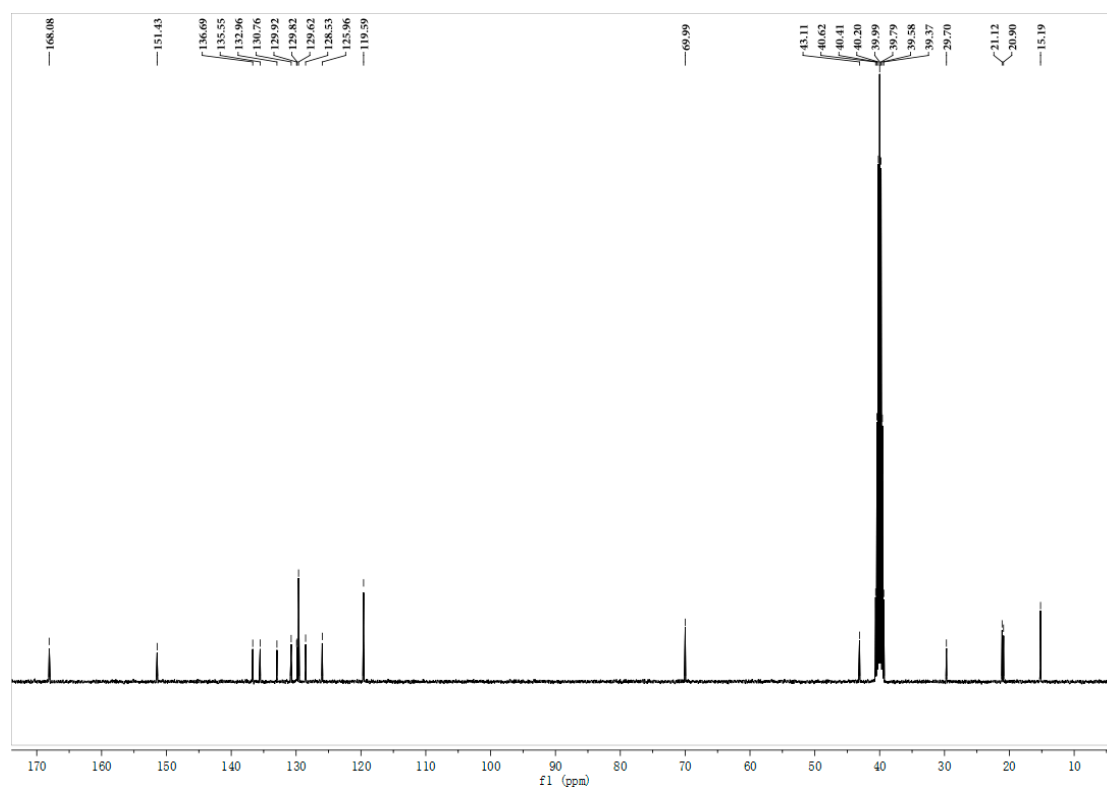<sup>13</sup>C NMR of compound 4x



Item name: XXL-055  
Item description:

Channel name: 1: Average Time 0.1217 min : TOF MS (50-1500) ESI+ : Centroided : Combined

9.68e7

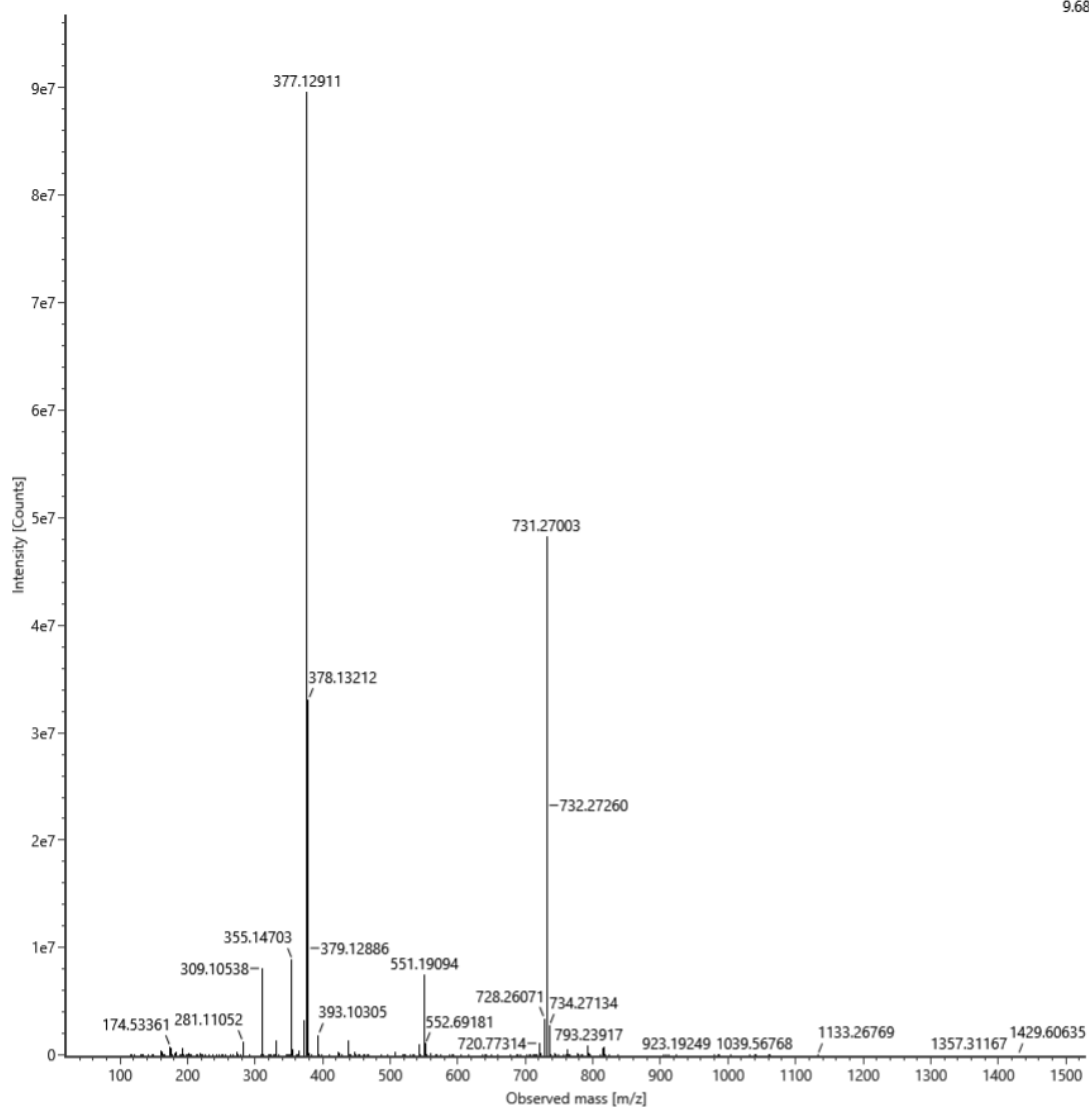

HRMS of compound 4x
